# Supplementary material
Source: MDPI journal article supplement (https://www.mdpi.com/2075-163X/14/3/295)
Supplement: s1 [file s1]

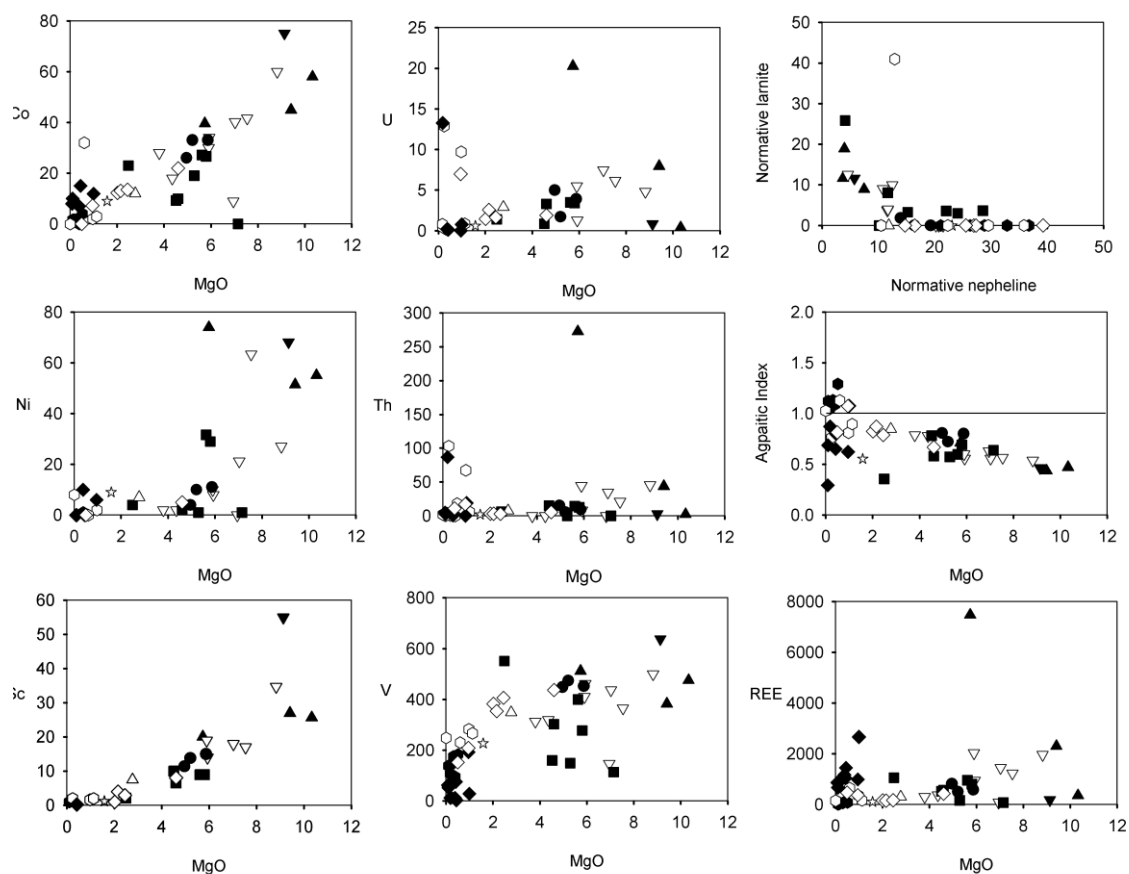

Figure S14a and S14b. Variation diagrams with CaO, MnO, Fe<sub>2</sub>O<sub>3</sub>, Al<sub>2</sub>O<sub>3</sub>, TiO<sub>2</sub>, SiO<sub>2</sub>, P<sub>2</sub>O<sub>5</sub>, K<sub>2</sub>O, Na<sub>2</sub>O, Ba, Sr, Rb, Ta, Hf, Zr, Y, Nb, Co, Ni, Sc, U, Th, V, and the REE plotted against MgO for the studied bulk rocks (oxides in wt. %, trace elements in wt. ppm).
