# Supplementary material
Source: MDPI journal article supplement (https://www.mdpi.com/2075-163X/14/3/295)
Supplement: s1 [file s1]

Archive with 31 entries (31 files):
- Figure S17.jpg
- Figure S18.pdf
- Table S1.XLS
- Table S2.xls
- Table S3.XLS
- Table S4.XLS
- Table S5.xls
- Table S6.xls
- Table S7.xls
- Table S8-S12.xls
- Table S13.XLS
- Text S1.pdf
- Text S2.pdf
- Text S3.pdf
- Figure S1.jpg
- Figure S2.jpg
- Figure S3.jpg
- Figure S4.pdf
- Figure S5.pdf
- Figure S6.pdf
- Figure S7.pdf
- Figure S8.pdf
- Figure S9.pdf
- Figure S10.pdf
- Figure S11.pdf
- Figure S12.pdf
- Figure S13.pdf
- Figure S14a.pdf
- Figure S14b.pdf
- Figure S15.pdf
- Figure S16.pdf
