# Supplementary material
Source: MDPI journal article supplement (https://www.mdpi.com/2075-163X/14/3/295)
Supplement: s1 [file s1 › Figure S6.pdf]

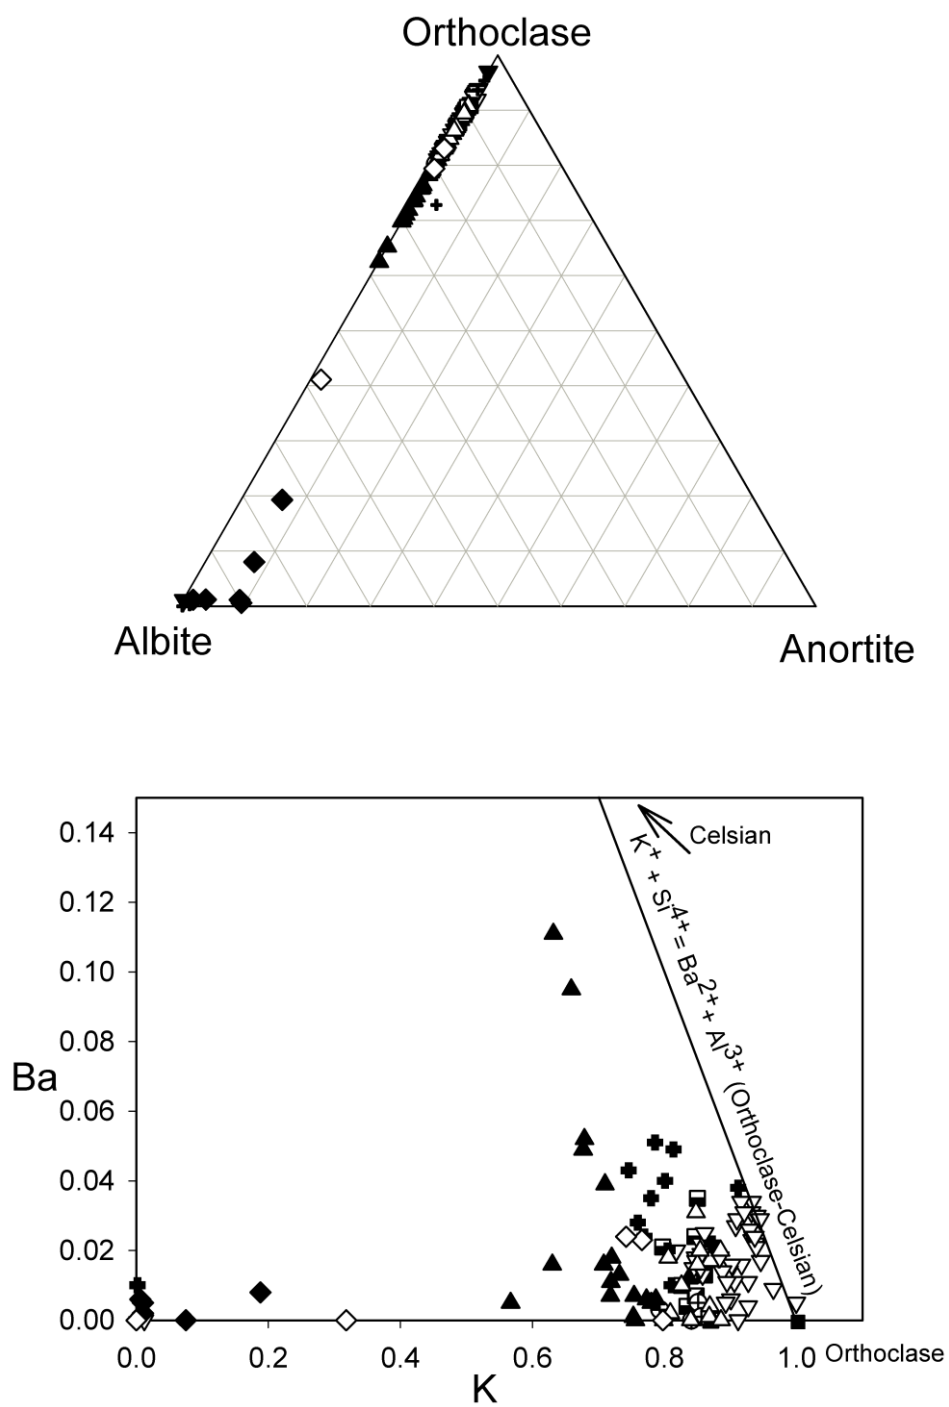

Figure S6. Compositional variation diagrams of feldspars of the ultra-alkaline Esquinzo Complex (data are plotted in cation per formula unit). Symbols as in Figure 6.
