# Supplementary material
Source: MDPI journal article supplement (https://www.mdpi.com/2075-163X/14/3/295)
Supplement: s1 [file s1 › Figure S7.pdf]

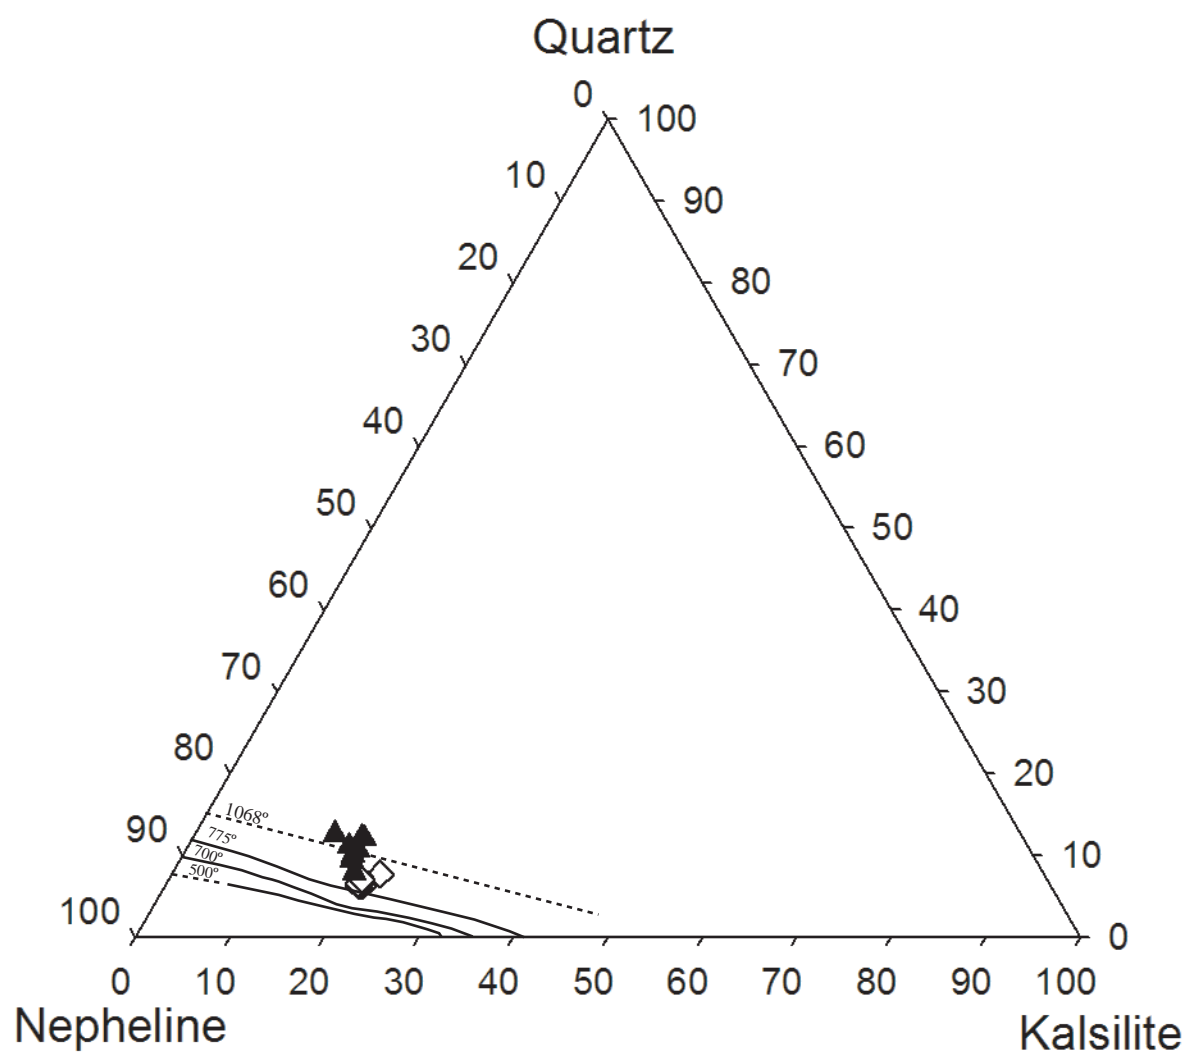

Figure S7. Compositional variation diagram of nephelines from the ultra-alkaline Esquinzo Complex (data are plotted in cation per formula unit). Symbols as in Figure 6.
