# Supplementary material
Source: MDPI journal article supplement (https://www.mdpi.com/2075-163X/14/3/295)
Supplement: s1 [file s1 › Figure S8.pdf]

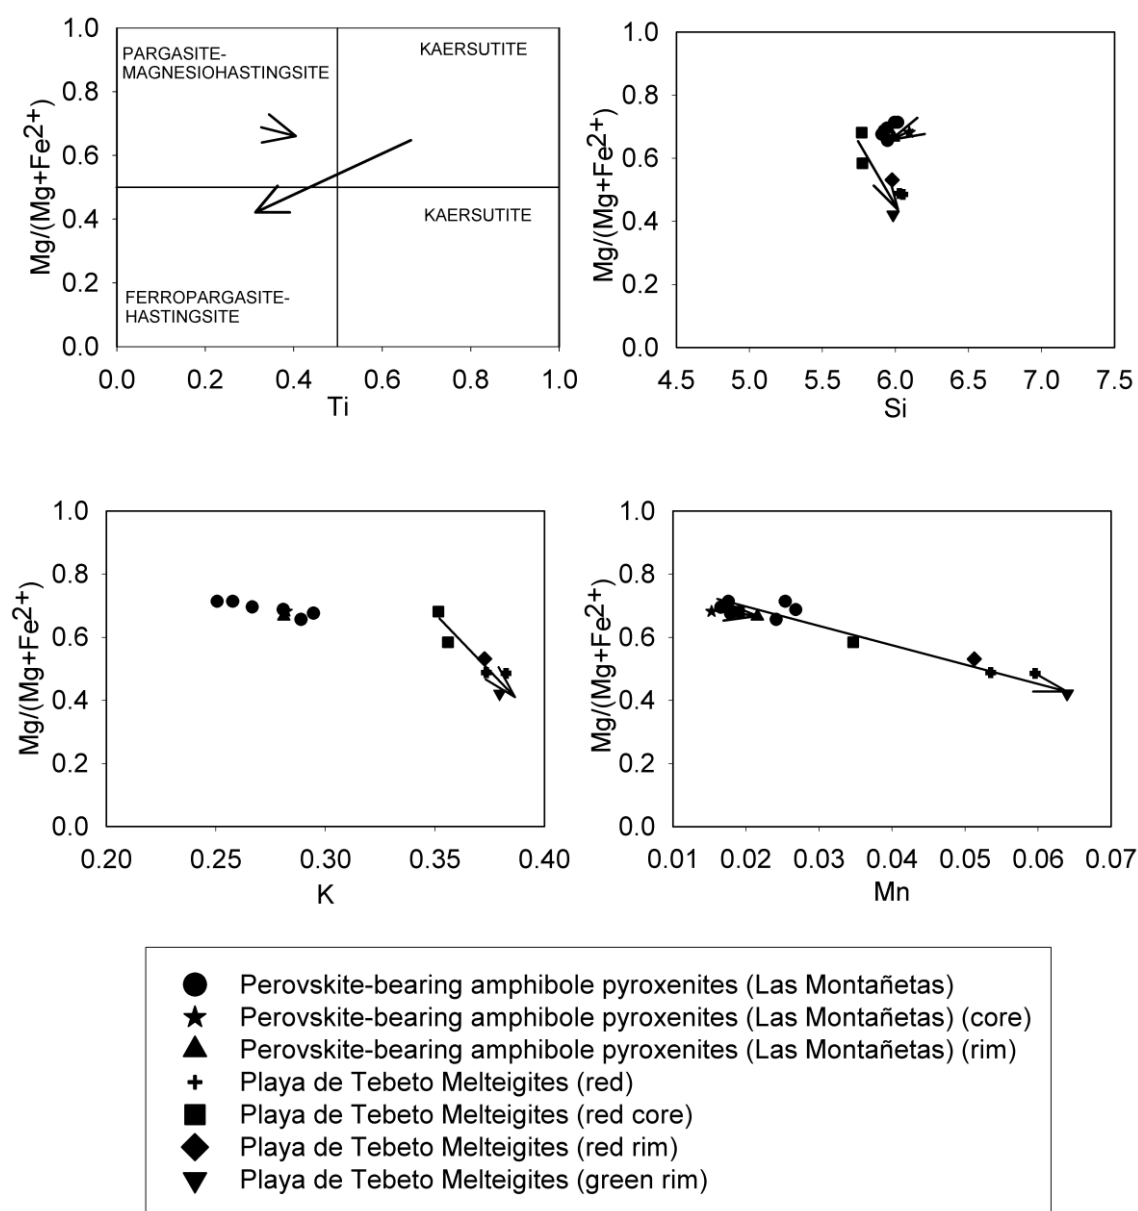

Figure S8. Compositional variation diagrams of amphiboles from the ultra-alkaline Esquinzo Complex (data are plotted in cation per formula unit on the x-axes and as atomic ratios on the y-axes).
