# Supplementary material
Source: MDPI journal article supplement (https://www.mdpi.com/2075-163X/14/3/295)
Supplement: s1 [file s1 › Figure S9.pdf]

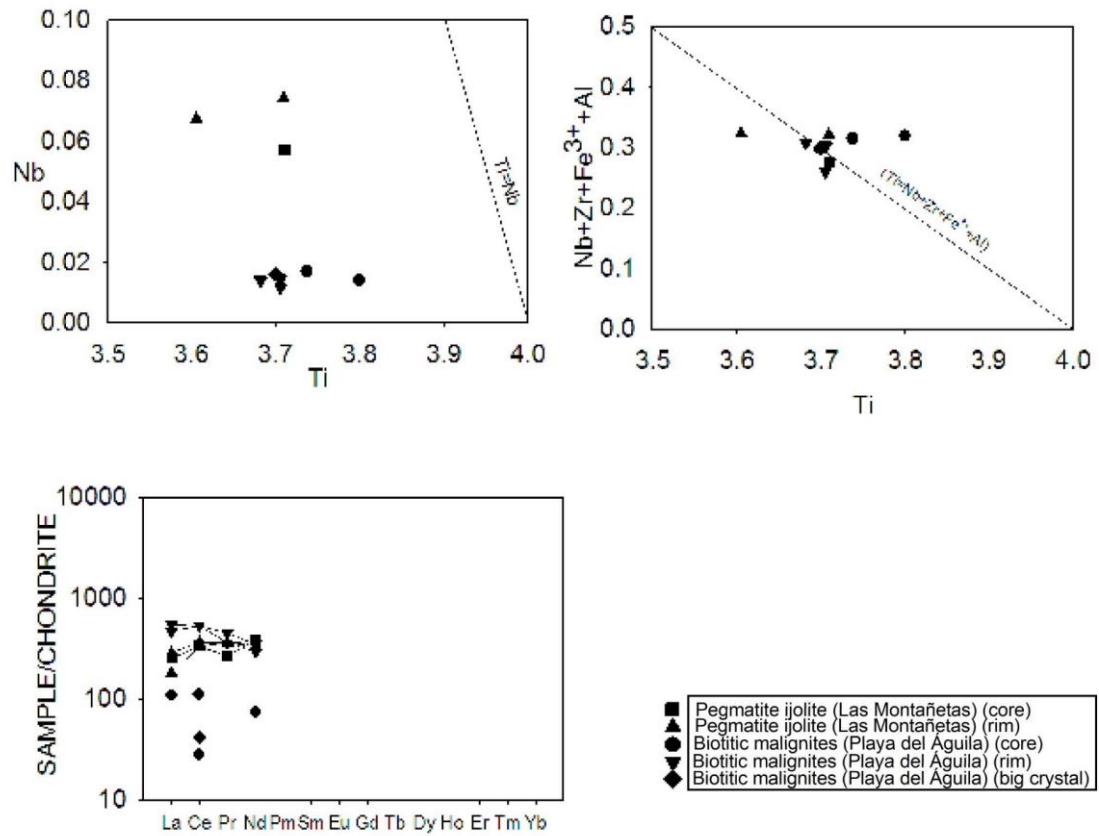

Figure S9. Compositional variation diagrams of titanites from the ultra-alkaline Esquinzo Complex (data in the first two plots are in atomic fractions) and CI-Chondrite normalized REE patterns, (last diagram, normalization values from [72]). Symbols as in Figure 6.
