# Supplementary material
Source: MDPI journal article supplement (https://www.mdpi.com/2075-163X/14/3/295)
Supplement: s1 [file s1 › Figure S11.pdf]

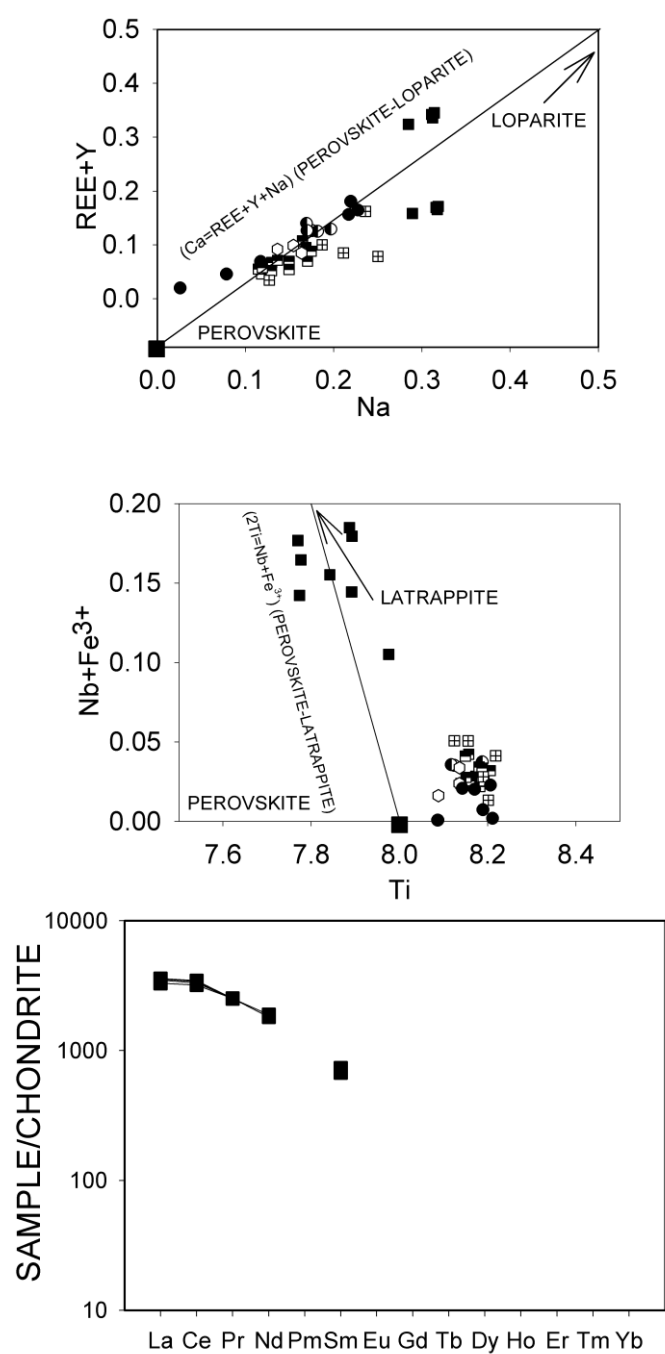

Figure S11. Compositional variation diagrams of perovskites from the ultra-alkaline Esquinzo Complex (data are plotted in cation per formula unit, first two diagrams and CI-Chondrite normalized REE patterns, last diagram, normalization values from [72]). Symbols as in Figure 6.
