# Supplementary material
Source: MDPI journal article supplement (https://www.mdpi.com/2075-163X/14/3/295)
Supplement: s1 [file s1 › Figure S15.pdf]

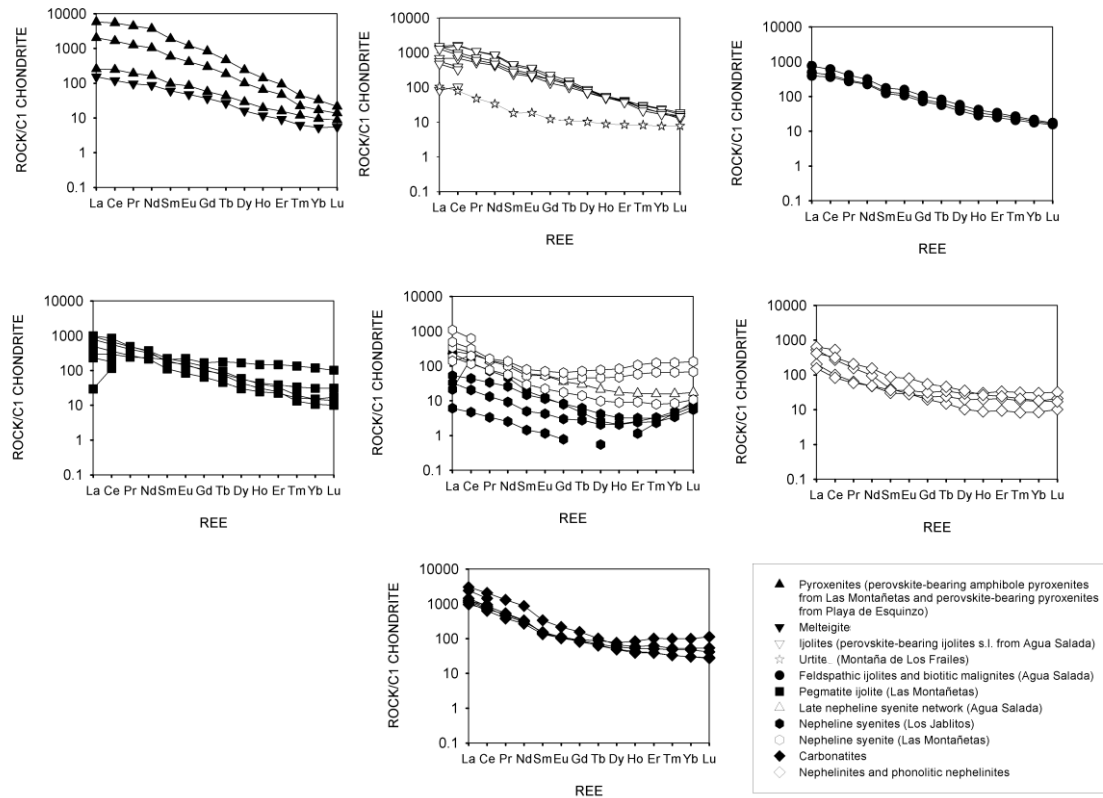

Figure S15. REE distribution for whole rocks from selected samples normalized to the C1 chondrites of [94].
