# Supplementary material
Source: MDPI journal article supplement (https://www.mdpi.com/2075-163X/14/3/295)
Supplement: s1 [file s1 › Figure S16.pdf]

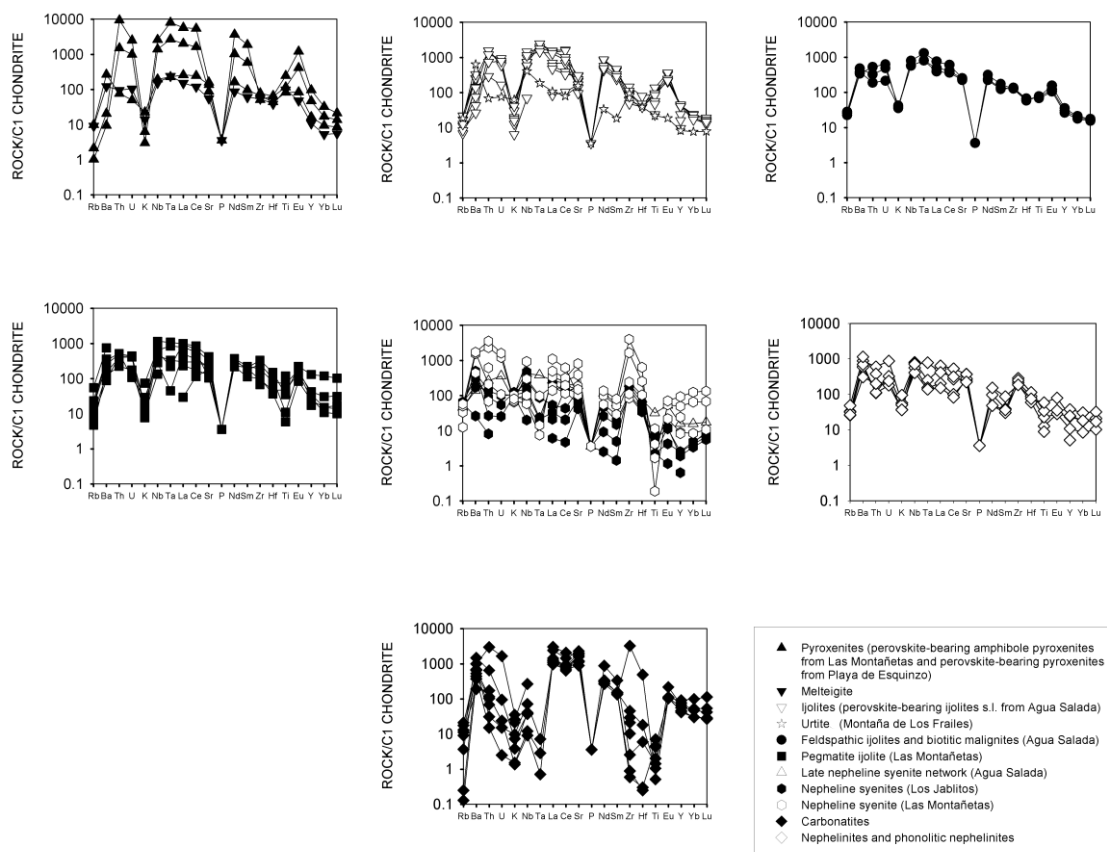

Figure S16. Element concentrations of the studied rocks normalized to the composition of C1 chondrites of [94].
