# Supplementary material
Source: MDPI journal article supplement (https://www.mdpi.com/2075-163X/14/3/295)
Supplement: s1 [file s1 › Table S1.XLS]

## Sheet: Hoja1
Table S1a: Representative analyses (in wt.) and formulae of pyroxenes from Esquinzo ultralkaline rocks											Table S1b: Representative analyses (in wt.) and formulae of pyroxenes from Esquinzo											Table S1c: Representative analyses (in wt.) and formulae of pyroxenes from Esquinzo											Table S1d: Representative analyses (in wt.) and formulae of pyroxenes from Esquinzo											Table S1e: Representative analyses (in wt.) and formulae of pyroxenes from Esquinzo
											ultralkaline rocks.											ultralkaline rocks.											ultralkaline rocks.											ultralkaline rocks.
Sample-Point	7720-7n	7720-8n	7720-9n	7720-10b	7720-13b	7720-1	7720-2	7720-14	7720-15	7720-16	Sample-Point	7720-20	7720-21	7720-22	7720-23	7720-24	7720-29	E70-01-139n	E70-01-141b	E17-01-42	E17-01-46	Sample-Point	E17-01-47	E18-01-178n	E18-01-179n	E18-01-184n	E18-01-185n	E18-01-186n	E18-01-194n	E18-01-195n	E18-01-203b	E18-01-204b	Sample-Point	E18-01-207n	E18-01-208b	E18-01-209b	E18-01-214	E18-01-216n	E18-01-217b	E19-01-151	E19-01-153b	E19-01-156n	E19-01-157b	Sample-Point	E19-01-158n	E19-01-163	E19-01-164	E19-01-169n	E19-01-171b
Rock Type	1	1	1	1	1	1	1	1	1	1	Rock Type	1	1	1	1	1	1	1	1	2	2	Rock Type	2	2	2	2	2	2	2	2	2	2	Rock Type	2	2	2	2	2	2	2	2	2	2	Rock Type	2	2	2	2	2
Plutonic Group	1	1	1	1	1	1	1	1	1	1	Plutonic Group	1	1	1	1	1	1	1	1	1	1	Plutonic Group	1	1	1	1	1	1	1	1	1	1	Plutonic Group	1	1	1	1	1	1	1	1	1	1	Plutonic Group	1	1	1	1	1
Observations											Observations							core	rim			Observations		core	core	core	core	core			rim	rim	Observations	core							rim	core	rim	Observations	core			core	rim
Color											Color											Color											Color											Color
SiO2	49.81	50.2	49.97	49.13	48.51	50.07	49.13	48.2	48.03	49.36	SiO2	49.33	50.53	48.92	49.28	49.39	48.23	47.19	46.92	45.59	46.97	SiO2	48.02	47.69	45.63	45.6	48.48	48.62	47.67	47.67	48.92	48.1	SiO2	48.33	48.07	48.18	49.43	49.18	48.72	48.05	47.32	45.33	45.97	SiO2	46.86	46.67	45.29	46.39	45.3
TiO2	1.64	1.64	1.57	2.25	2.32	1.9	2.11	2.36	2.51	1.95	TiO2	2.1	1.75	2.14	2.15	2.03	2.09	2.94	3.34	3.4	3.47	TiO2	2.83	2.47	3.64	3.85	1.84	2.13	2.64	2.41	1.52	1.95	TiO2	2.33	2.21	2.31	1.29	1.24	1.23	1.57	2.27	3.91	3.08	TiO2	3.04	2.39	3.78	3.13	4.11
Al2O3	2.88	2.83	2.63	4.08	4.31	3.21	3.78	4.12	4.3	3.52	Al2O3	3.72	2.9	3.92	3.95	3.5	3.97	4.9	5.28	5.18	4.01	Al2O3	3.32	3.44	4.95	5.45	3.28	2.85	3.41	3.68	2.89	3.32	Al2O3	2.83	3.15	2.71	2.49	2.31	2.26	2.84	3.34	5.18	4.71	Al2O3	3.78	4.3	5.25	4.58	5.36
FeOT	6.47	6.47	6.19	6.8	6.25	6.74	6.31	6.08	6.92	6.3	FeOT	6.67	5.4	6.39	6.29	5.65	7.43	7.16	6.99	7.67	5.87	FeOT	5.68	8.1	8.27	6.45	8.16	7.19	6.72	7.35	8.56	8.08	FeOT	7.87	7.17	7.78	8.25	8.23	8.45	8.69	7.53	6.16	6.76	FeOT	5.52	8.63	6.16	5.57	6.37
Cr2O3	<	<	<	<	<	<	<	<	<	<	Cr2O3	<	<	<	<	<	<	<	<	<	<	Cr2O3	<	<	<	<	<	<	<	<	<	<	Cr2O3	<	<	<	<	<	<	<	<	<	<	Cr2O3	<	<	<	<	<
MnO	0.18	0.17	0.19	0.09	0.16	0.18	0.1	0.18	0.24	0.17	MnO	0.15	0.15	0.13	0.12	0.09	0.16	0.09	0.16	0.15	0.1	MnO	<	0.28	0.13	0.1	0.3	0.29	0.16	0.16	0.31	0.19	MnO	0.28	0.25	0.28	0.48	0.34	0.34	0.2	0.13	<	0.17	MnO	<	0.27	<	<	0.15
NiO	<	<	<	<	<	<	<	<	<	<	NiO	<	<	<	<	<	<	<	<	<	<	NiO	<	<	<	<	<	<	<	<	0.18	<	NiO	<	<	<	<	<	<	<	<	<	<	NiO	<	<	<	<	<
MgO	13.35	13.45	13.59	12.98	13.17	13.57	13.49	13.39	12.56	13.33	MgO	13.03	14.05	13.29	13.22	13.83	12.79	12.77	13.01	11.64	13.38	MgO	13.99	12.47	11.46	13.53	12.53	12.78	12.91	12.61	11.73	12.09	MgO	12.74	12.99	12.6	12.02	12.23	12.1	11.84	12.39	13.07	12.2	MgO	13.64	11.41	12.9	13.46	12.04
CaO	22.91	23.15	23.12	23.19	23.36	22.96	23.11	23.08	23.4	23.51	CaO	23.86	24.18	23.37	23.09	24.2	23.34	24.19	24.71	24.37	25.17	CaO	25.33	25.08	24.57	24.86	24.41	24.99	24.97	24.81	24.05	24.23	CaO	24.79	24.96	24.93	24.32	24.57	24.34	23.99	24.09	25.22	24.71	CaO	25.1	24.58	24.86	24.82	25.03
Na2O	0.68	0.75	0.62	0.84	0.78	0.82	0.78	0.81	0.8	0.75	Na2O	0.82	0.63	0.84	0.73	0.68	0.87	0.87	0.87	0.9	0.6	Na2O	0.36	0.81	0.92	0.44	0.96	0.79	0.77	0.81	1.1	1.06	Na2O	0.77	0.79	0.67	0.9	0.95	0.99	1.02	0.95	0.44	0.85	Na2O	0.55	0.9	0.49	0.65	0.77
K2O	<	<	<	<	<	<	<	<	<	<	K2O	<	<	<	<	<	<	<	<	<	<	K2O	<	<	<	<	<	0.03	<	<	<	<	K2O	<	<	<	<	<	<	<	<	<	<	K2O	<	<	<	<	<
Total	97.92	98.66	97.88	99.36	98.86	99.45	98.81	98.22	98.76	98.89	Total	99.68	99.59	99	98.83	99.37	98.88	100.11	101.28	98.9	99.57	Total	99.53	100.34	99.57	100.28	99.96	99.67	99.25	99.5	99.26	99.02	Total	99.94	99.59	99.46	99.18	99.05	98.43	98.2	98.02	99.31	98.45	Total	98.49	99.15	98.73	98.6	99.13
Structural formulae on the basis of 6 O											Structural formulae on the basis of 6 O											Structural formulae on the basis of 6 O											Structural formulae on the basis of 6 O											Structural formulae on the basis of 6 O
TSi	1.884	1.883	1.889	1.831	1.815	1.863	1.838	1.813	1.806	1.847	TSi	1.834	1.871	1.827	1.844	1.834	1.81	1.75	1.718	1.72	1.747	TSi	1.785	1.772	1.713	1.688	1.804	1.814	1.783	1.781	1.838	1.807	TSi	1.801	1.792	1.806	1.858	1.848	1.844	1.824	1.794	1.696	1.735	TSi	1.757	1.759	1.703	1.737	1.703
TAl	0.116	0.117	0.111	0.169	0.185	0.137	0.162	0.183	0.19	0.153	TAl	0.163	0.126	0.172	0.156	0.153	0.175	0.214	0.228	0.23	0.176	TAl	0.145	0.151	0.219	0.238	0.144	0.125	0.15	0.162	0.128	0.147	TAl	0.124	0.138	0.12	0.11	0.102	0.101	0.127	0.149	0.228	0.209	TAl	0.167	0.191	0.233	0.202	0.237
TFe3+	0	0	0	0	0	0	0	0.004	0.004	0	TFe3+	0.003	0.003	0.001	0	0.013	0.015	0.036	0.054	0.05	0.077	TFe3+	0.07	0.078	0.068	0	0.053	0.061	0.067	0.057	0.034	0.046	TFe3+	0.075	0.07	0.075	0.032	0.05	0.056	0.049	0.057	0	0.055	TFe3+	0	0.05	0.064	0	0.06
M1Al	0.012	0.008	0.006	0.01	0.005	0.004	0.004	0	0	0.002	M1Al	0	0	0	0.019	0	0	0	0	0	0	M1Al	0	0	0	0	0	0	0	0	0	0	M1Al	0	0	0	0	0	0	0	0	0	0	M1Al	0	0	0	0	0
M1Ti	0.047	0.046	0.045	0.063	0.065	0.053	0.059	0.067	0.071	0.055	M1Ti	0.059	0.049	0.06	0.061	0.057	0.059	0.082	0.092	0.096	0.097	M1Ti	0.079	0.069	0.103	0.107	0.051	0.06	0.074	0.068	0.043	0.055	M1Ti	0.065	0.062	0.065	0.036	0.035	0.035	0.045	0.065	0.11	0.087	M1Ti	0.086	0.068	0.107	0.088	0.116
M1Fe3+	0.06	0.07	0.061	0.091	0.106	0.086	0.095	0.112	0.108	0.095	M1Fe3+	0.108	0.077	0.113	0.069	0.101	0.135	0.148	0.159	0.152	0.098	M1Fe3+	0.084	0.148	0.148	0	0.162	0.125	0.123	0.141	0.155	0.158	M1Fe3+	0.123	0.141	0.112	0.135	0.151	0.159	0.162	0.147	0	0.151	M1Fe3+	0	0.17	0.117	0	0.12
M1Fe2+	0.128	0.123	0.123	0.112	0.087	0.104	0.088	0.071	0.106	0.102	M1Fe2+	0.096	0.087	0.086	0.112	0.062	0.084	0.038	0.002	0.04	0.008	M1Fe2+	0.023	0.026	0.044	0.146	0.039	0.038	0.02	0.031	0.08	0.05	M1Fe2+	0.048	0.013	0.057	0.092	0.059	0.052	0.065	0.035	0.161	0.007	M1Fe2+	0.148	0.052	0.013	0.159	0.02
M1Cr	0	0.001	0	0.003	0	0	0	0	0.002	0	M1Cr	0	0	0.001	0	0	0	0	0	0	0.003	M1Cr	0	0	0	0	0	0	0.001	0.001	0.002	0.002	M1Cr	0.001	0	0	0	0	0	0	0.001	0	0	M1Cr	0.001	0.001	0.001	0.002	0
M1Mg	0.753	0.752	0.766	0.721	0.734	0.753	0.752	0.751	0.704	0.744	M1Mg	0.722	0.776	0.74	0.738	0.766	0.715	0.706	0.71	0.655	0.742	M1Mg	0.775	0.691	0.642	0.747	0.695	0.711	0.72	0.702	0.657	0.677	M1Mg	0.708	0.722	0.704	0.673	0.685	0.683	0.67	0.7	0.729	0.687	M1Mg	0.763	0.641	0.723	0.751	0.675
M1Ni	0	0	0	0	0.002	0	0	0	0	0	M1Ni	0	0.001	0.001	0.002	0	0	0	0.001	0	0.001	M1Ni	0.002	0	0.003	0	0.001	0	0	0	0.005	0	M1Ni	0.001	0.001	0.003	0.003	0.001	0	0	0	0	0.001	M1Ni	0.002	0.001	0.001	0	0
M2Mg	0	0	0	0	0	0	0	0	0	0	M2Mg	0	0	0	0	0	0	0	0	0	0	M2Mg	0	0	0	0	0	0	0	0	0	0	M2Mg	0	0	0	0	0	0	0	0	0	0	M2Mg	0	0	0	0	0
M2Fe2+	0.016	0.01	0.012	0.009	0.002	0.019	0.014	0.005	0	0	M2Fe2+	0	0	0	0.016	0	0	0	0	0	0	M2Fe2+	0	0	0	0.054	0	0	0	0	0	0	M2Fe2+	0	0	0	0	0	0	0	0	0.031	0	M2Fe2+	0.025	0	0	0.015	0
M2Mn	0.006	0.005	0.006	0.003	0.005	0.006	0.003	0.006	0.008	0.005	M2Mn	0.005	0.005	0.004	0.004	0.003	0.005	0.003	0.005	0.005	0.003	M2Mn	0.002	0.009	0.004	0.003	0.009	0.009	0.005	0.005	0.01	0.006	M2Mn	0.009	0.008	0.009	0.015	0.011	0.011	0.006	0.004	0.001	0.005	M2Mn	0.002	0.009	0.001	0.002	0.005
M2Ca	0.928	0.93	0.936	0.926	0.936	0.915	0.926	0.93	0.943	0.943	M2Ca	0.95	0.959	0.935	0.926	0.963	0.938	0.961	0.97	0.985	1.003	M2Ca	1.009	0.998	0.989	0.986	0.973	0.999	1.001	0.993	0.968	0.975	M2Ca	0.99	0.997	1.001	0.979	0.989	0.987	0.976	0.978	1.011	0.999	M2Ca	1.009	0.993	1.002	0.996	1.008
M2Na	0.05	0.055	0.045	0.061	0.057	0.059	0.057	0.059	0.058	0.054	M2Na	0.059	0.045	0.061	0.053	0.049	0.063	0.063	0.062	0.066	0.043	M2Na	0.026	0.058	0.067	0.032	0.069	0.057	0.056	0.059	0.08	0.077	M2Na	0.056	0.057	0.049	0.066	0.069	0.073	0.075	0.07	0.032	0.062	M2Na	0.04	0.066	0.036	0.047	0.056
M2K	0	0	0	0.001	0	0	0	0	0	0	M2K	0.001	0.001	0	0.001	0	0	0	0	0	0	M2K	0.001	0	0.001	0	0	0.001	0	0	0	0	M2K	0	0	0	0	0	0	0.001	0.001	0.001	0	M2K	0	0	0	0.001	0
Cations	4	4	4	3.999	4	4	4	4	4	4	Cations	3.999	3.999	4	3.999	4	4	4	4	4	4	Cations	3.999	4	3.999	4	4	3.999	4	4	4	4	Cations	4	4	4	4	4	4	3.999	3.999	3.999	4	Cations	4	4	4	3.999	4
Jadeite	0.643	0.405	0.317	0.56	0.255	0.201	0.233	0	0	0.112	Jadeite	0	0	0	1.006	0	0	0	0	0	0	Jadeite	0	0	0	0	0	0	0	0	0	0	Jadeite	0	0	0	0	0	0	0	0	0	0	Jadeite	0	0	0	0	0
Aegirine	2.016	2.512	2.097	2.809	2.859	3.021	2.872	3.254	3.247	2.841	Aegirine	3.285	2.472	3.338	1.916	2.662	3.515	3.54	3.544	3.798	2.435	Aegirine	1.467	3.317	3.901	1.608	3.899	3.243	3.108	3.287	4.515	4.34	Aegirine	3.089	3.192	2.689	3.622	3.841	4.074	4.256	3.968	1.673	3.545	Aegirine	2.016	3.782	2.015	2.445	3.191
CFTS	1.2	1.311	1.141	2.302	2.978	1.63	2.34	2.895	2.849	2.323	CFTS	2.639	1.667	2.875	1.84	2.818	3.979	4.845	5.552	4.93	3.214	CFTS	3.098	5.047	4.609	0	5.241	3.682	3.8	4.664	4.257	4.644	CFTS	3.763	4.683	3.516	3.821	4.512	4.8	4.808	4.291	0	5.082	CFTS	0	5.997	4.639	0	3.648
CTTS	2.488	2.475	2.372	3.446	3.593	2.872	3.231	3.678	3.92	2.979	CTTS	3.212	2.609	3.299	3.28	3.083	3.276	4.641	5.278	5.526	5.405	CTTS	4.315	3.892	5.903	5.459	2.899	3.309	4.134	3.794	2.406	3.097	CTTS	3.626	3.464	3.597	2.014	1.945	1.951	2.509	3.628	5.598	4.984	CTTS	4.322	3.868	6.03	4.476	6.607
CATS	0	0	0	0	0	0	0	0	0	0	CATS	0	0	0	0	0	0	0	0	0	0	CATS	0	0	0	0	0	0	0	0	0	0	CATS	0	0	0	0	0	0	0	0	0	0	CATS	0	0	0	0	0
Wollastonite	45.817	45.975	46.232	44.848	44.963	44.94	44.836	44.66	45.283	45.853	Wollastonite	46.13	47.068	45.147	45.056	46.443	44.851	44.9	44.785	45.961	47.223	Wollastonite	47.603	47.349	46.241	44.747	46.647	48.31	47.757	47.175	47.561	47.072	Wollastonite	47.567	47.586	48.177	48.251	48.434	48.229	47.292	46.925	45.836	46.885	Wollastonite	46.506	46.795	45.819	46.078	47.06
Enstatite	40.138	40.226	40.684	39.404	40.426	40.658	40.941	41.357	38.874	40.357	Enstatite	39.497	41.51	40.609	39.972	41.622	39.728	39.947	40.742	37.494	41.303	Enstatite	42.278	38.94	36.831	38.019	39.131	39.35	40.063	39.343	36.798	38.054	Enstatite	39.297	40.358	38.881	37.194	38.016	38.029	37.5	39.248	37.088	39.124	Enstatite	38.432	36.595	40.784	38.146	38.36
Ferrosilite	7.697	7.096	7.157	6.63	4.925	6.678	5.546	4.156	5.827	5.535	Ferrosilite	5.237	4.675	4.731	6.929	3.372	4.652	2.127	0.1	2.29	0.42	Ferrosilite	1.239	1.456	2.516	10.167	2.182	2.106	1.139	1.738	4.462	2.793	Ferrosilite	2.657	0.717	3.14	5.097	3.252	2.917	3.635	1.94	9.806	0.38	Ferrosilite	8.725	2.963	0.713	8.855	1.134
Rock type: 1: Perovskite-bearing amphibole Pyroxenite (Las Montañetas).											Rock type: 1: Perovskite-bearing amphibole Pyroxenite (Las Montañetas); 2: Perovskite-bearing pyroxenites (Playa de Esquinzo).											Rock type: 2: Perovskite-bearing pyroxenites (Playa de Esquinzo).											Rock type: 2: Perovskite-bearing pyroxenites (Playa de Esquinzo).											Rock type: 2: Perovskite-bearing pyroxenites (Playa de Esquinzo).
< indicate below the detection limit.Nd: not determined.											< indicate below the detection limit.Nd: not determined.											< indicate below the detection limit.Nd: not determined.											< indicate below the detection limit.Nd: not determined.											< indicate below the detection limit.Nd: not determined.
[truncated: 192 more columns]
