# Supplementary material
Source: MDPI journal article supplement (https://www.mdpi.com/2075-163X/14/3/295)
Supplement: s1 [file s1 › Table S2.xls]

## Sheet: Hoja1
Table S2a: Representative analyses (in wt.) and formulae of micas from Esquinzo											Table S2b: Representative analyses (in wt.) and formulae of micas from Esquinzo											Table S2c: Representative analyses (in wt.) and formulae of micas from Esquinzo											Table S2d: Representative analyses (in wt.) and formulae of micas from Esquinzo											Table S2e: Representative analyses ((in wt.) and formulae of micas from Esquinzo
ultralkaline rocks.											ultralkaline rocks.											ultralkaline rocks.											ultralkaline rocks.											ultralkaline rocks.
Sample-Point	E70-01-123	E70-01-131	E17-01-37	E17-01-38	E17-01-43	E17-01-44	E18-01-177	E18-01-181	E18-01-182	E18-01-183	Sample-Point	E18-01-192	E18-01-193	E18-01-201	E18-01-205	E18-01-206	E19-01-161	E19-01-162	E19-01-170	E14-01-157	E14-01-163	Sample-Point	E14-01-172	E14-01-174	8419-1A-53	8419-1A-56	8419-2B-61	8419-2A-63	8419-2A-67b	E76-01-1A-74	E76-01-1A-76	E8-01-2	Sample-Point	E8-01-8	E8-01-187	E8-01-192	8434-1A-76	8434-1A-77b	8434-2A-81b	8434-2A-82b	8434-2A-83n	8434-2A-84n	8434-2C-86	Sample-Point	8434-2D-91	8434-2D-92	8434-3A-95n	8434-3A-96n	8434-3A-97b
Rock Type	1	1	2	2	2	2	2	2	2	2	Rock Type	2	2	2	2	2	2	2	2	3	3	Rock Type	3	3	4	4	4	4	4	5	5	7	Rock Type	7	9	9	11	11	11	11	11	11	11	Rock Type	11	11	11	11	11
Plutonic Group	1	1	1	1	1	1	1	1	1	1	Plutonic Group	1	1	1	1	1	1	1	1	1	1	Plutonic Group	1	1	1	1	1	1	1	1	1	1	Plutonic Group	1	1	1	1	1	1	1	1	1	1	Plutonic Group	1	1	1	1	1
Observations											Observations											Observations											Observations				cristal 1	cristal 2	cristal 3	cristal 3	cristal 3	cristal 3	cristal 4	Observations	crsital 5	cristal 5	cristal 6	cristal 6	cristal 6
Color											Color											Color											Color				white	brown	brown	brown	white	white		Color			white	white	brown
SiO2	37.39	38.07	36.59	35.97	36.37	36.47	37.49	37.67	36.06	35.96	SiO2	36.55	35.81	35.91	37.54	36.44	36.15	37.01	37.32	38	36.36	SiO2	37.37	36.55	36.54	36.71	36.72	35.69	35.26	35.31	35.62	38.72	SiO2	35.4	36.83	36	34.78	35.67	37.34	36.14	35.9	35.85	38.21	SiO2	36.32	36.77	36.49	36.6	36.45
TiO2	3.24	2.97	5.06	5.35	4.71	4.94	3.53	3.4	5.12	5.03	TiO2	5.03	5.29	3.91	3.44	3.39	5.27	4.52	4.63	3.61	4.63	TiO2	5.06	3.97	4.02	3.79	4	3.72	4.85	2.48	2.49	2.47	TiO2	4.06	4.73	4.21	4.7	3.64	3.34	3.5	5.04	5.05	2.53	TiO2	2.97	3.31	5.06	5.07	2.74
Al2O3	15.09	14.76	14.34	14.05	13.97	14.46	14.71	14.82	14.27	14.28	Al2O3	14.13	14.45	14.56	14.86	14.83	14.69	14.8	14.17	14.06	14.49	Al2O3	14.7	14.88	13.48	13.69	13.38	14.76	14.84	12.56	12.53	12.69	Al2O3	12.28	11.66	12.04	14.34	9.81	10.65	11.33	14.88	15.07	10.55	Al2O3	10.95	11.02	14.91	14.82	10.79
Cr2O3	<	<	<	<	<	<	<	<	<	<	Cr2O3	<	<	<	<	<	<	<	<	<	<	Cr2O3	<	<	<	<	<	<	<	<	<	<	Cr2O3	<	<	<	<	<	<	<	<	<	<	Cr2O3	<	<	<	<	<
FeOT	11.01	10.81	12.58	13.3	13.22	13.35	11.07	11.51	13.09	13.59	FeOT	11.85	12.17	13.12	10.84	11.65	11.67	11.49	11.45	12.32	11.29	FeOT	13.27	12.32	16.69	16.66	16.26	16.07	17.34	24.32	24.46	12.56	FeOT	22.37	22.2	21.53	13.68	22.19	23.77	23.68	12.21	12.4	18.7	FeOT	24.29	23.29	11.36	10.32	24.71
MnO	0.2	0.12	0.17	0.23	0.27	0.2	0.22	0.27	0.33	0.35	MnO	0.28	0.2	0.27	0.22	0.23	0.21	0.13	0.13	0.21	0.23	MnO	0.17	0.32	0.44	0.41	0.39	0.27	0.33	0.7	0.6	0.36	MnO	0.48	0.58	0.55	0.29	0.73	0.83	0.75	0.19	0.26	0.7	MnO	1.14	1.19	0.16	0.1	0.98
MgO	18.59	18.77	16.66	15.96	16.42	16.19	18.41	18.38	16.03	15.59	MgO	17.17	16.55	16.36	18.34	18.57	17.08	17.23	17.61	16.99	16.47	MgO	16.04	16.51	13.68	13.83	14.44	14.44	12.83	10.13	9.66	18.22	MgO	10.77	11.14	10.8	14.41	11	10.56	10.44	16.6	16.2	14.09	MgO	10.15	10.38	17.19	17.67	10.21
CaO	<	<	<	<	<	<	<	<	<	<	CaO	<	<	0.14	<	<	<	<	<	0.08	0.06	CaO	<	<	<	<	<	<	<	<	<	<	CaO	<	<	<	0.07	0.08	<	0.06	<	0.07	<	CaO	<	0.13	0.07	<	0.07
BaO	0.59	<	<	1.18	<	0.74	0.67	0.55	0.61	0.77	BaO	1.28	0.65	0.86	0.86	0.69	0.53	<	0.53	0.69	1.06	BaO	1.08	1.17	<	<	<	<	<	<	<	<	BaO	1.31	0.44	0.69	<	<	<	<	<	<	<	BaO	<	<	<	<	<
Na2O	0.24	0.25	0.55	0.4	0.37	0.38	0.39	0.38	0.51	0.46	Na2O	0.73	0.54	0.4	0.34	0.25	0.91	0.66	0.78	0.22	0.26	Na2O	0.2	0.2	0.21	0.26	0.21	0.3	0.39	0.24	0.2	0.22	Na2O	0.15	0.26	0.27	0.21	0.27	0.14	0.25	0.55	0.47	0.27	Na2O	0.2	0.28	0.64	0.66	0.21
K2O	9.52	9.7	9.31	8.23	9.3	9.38	9.49	9.55	8.76	8.98	K2O	8.96	8.83	9.14	9.37	9.55	8.4	8.99	8.65	9.46	9.38	K2O	9.08	9.34	10.03	9.98	10.11	9.88	9.54	9.56	9.85	9.8	K2O	9.23	9.35	9.22	9.55	9.14	9.88	9.62	9.65	9.62	9.9	K2O	9.86	9.8	9.41	9.49	9.58
F	<	<	0.45	0.38	0.3	<	0.27	0.47	<	0.2	F	<	<	0.19	0.36	0.29	<	<	<	0.18	<	F	0.28	<	<	<	<	<	<	<	<	0.46	F	0.28	0.21	0.34	<	<	<	<	<	<	<	F	<	<	<	<	<
Cl	<	<	<	<	<	<	<	<	<	<	Cl	<	<	<	<	<	<	<	<	<	<	Cl	<	<	<	<	<	<	<	<	<	<	Cl	<	<	<	<	<	<	<	<	<	<	Cl	<	<	<	<	<
Total	95.87	95.45	95.71	95.05	94.93	96.11	96.25	97	94.78	95.21	Total	95.98	94.49	94.86	96.17	95.89	94.91	94.83	95.27	95.82	94.23	Total	97.25	95.26	95.09	95.33	95.51	95.13	95.38	95.3	95.41	95.5	Total	96.33	97.4	95.65	92.03	92.53	96.51	95.77	95.02	94.99	94.95	Total	95.88	96.17	95.29	94.74	95.74
Structural formulae on the basis of 22 O											Structural formulae on the basis of 22 O											Structural formulae on the basis of 22 O											Structural formulae on the basis of 22 O											Structural formulae on the basis of 22 O
SiIV	5.473	5.561	5.421	5.402	5.441	5.409	5.489	5.489	5.399	5.399	SiIV	5.406	5.364	5.404	5.499	5.388	5.355	5.452	5.489	5.607	5.464	SiIV	5.476	5.451	5.048	5.052	5.042	4.911	4.869	5.04	5.088	5.73	SiIV	5.514	5.617	5.597	4.906	5.203	5.247	5.123	4.859	4.86	5.317	SiIV	5.171	5.193	4.893	4.912	5.193
AlIV	2.53	2.44	2.502	2.485	2.461	2.526	2.51	2.51	2.516	2.525	AlIV	2.461	2.549	2.58	2.5	2.583	2.563	2.55	2.454	2.39	2.54	AlIV	2.52	2.55	2.193	2.219	2.164	2.392	2.413	2.111	2.108	2.208	AlIV	2.253	2.094	2.204	2.382	1.685	1.762	1.892	2.372	2.406	1.729	AlIV	1.836	1.833	2.355	2.342	1.81
Ti	0.357	0.326	0.564	0.604	0.53	0.551	0.389	0.373	0.577	0.568	Ti	0.56	0.596	0.443	0.379	0.377	0.587	0.501	0.512	0.401	0.523	Ti	0.558	0.445	0.418	0.392	0.413	0.385	0.504	0.266	0.268	0.275	Ti	0.476	0.543	0.492	0.499	0.399	0.353	0.373	0.513	0.515	0.265	Ti	0.318	0.352	0.51	0.512	0.294
AlVI	0.07	0.1	0	0	0	0	0.03	0.03	0	0	AlVI	0	0	0	0.06	0	0	0.02	0	0.05	0.02	AlVI	0.02	0.06	0	0	0	0	0	0	0	0	AlVI	0	0	0	0	0	0	0	0	0	0	AlVI	0	0	0	0	0
Fe3+	0.11	0.13	0.12	0.16	0.13	0.11	0.13	0.13	0.14	0.14	Fe3+	0.15	0.12	0.17	0.12	0.13	0.17	0.14	0.19	0.14	0.07	Fe3+	0.07	0.1	0.16	0.17	0.15	0.15	0.13	0.4	0.38	0.23	Fe3+	0.34	0.31	0.34	0.09	0.43	0.36	0.37	0.08	0.06	0.35	Fe3+	0.39	0.36	0.08	0.07	0.43
Fe2+	1.222	1.181	1.427	1.496	1.504	1.538	1.211	1.255	1.48	1.554	Fe2+	1.296	1.389	1.46	1.189	1.294	1.255	1.259	1.202	1.366	1.338	Fe2+	1.545	1.424	1.754	1.73	1.696	1.679	1.853	2.458	2.495	1.298	Fe2+	2.534	2.482	2.426	1.51	2.226	2.39	2.395	1.298	1.339	1.785	Fe2+	2.46	2.35	1.184	1.082	2.465
Cr	0.003	0	0	0.001	0.001	0	0	0	0	0.005	Cr	0	0	0	0.005	0	0	0	0	0.002	0	Cr	0	0.004	0.001	0	0	0.003	0.002	0.007	0	0	Cr	0.004	0	0	0	0.005	0	0.003	0	0	0.003	Cr	0	0	0	0	0
Mn	0.025	0.015	0.021	0.029	0.034	0.025	0.027	0.033	0.042	0.045	Mn	0.035	0.025	0.034	0.027	0.029	0.026	0.016	0.016	0.026	0.029	Mn	0.021	0.04	0.051	0.048	0.045	0.031	0.039	0.085	0.073	0.045	Mn	0.063	0.075	0.072	0.035	0.09	0.099	0.09	0.022	0.03	0.083	Mn	0.137	0.142	0.018	0.011	0.118
Mg	4.056	4.087	3.68	3.573	3.662	3.58	4.019	3.993	3.578	3.489	Mg	3.786	3.696	3.67	4.005	4.094	3.772	3.784	3.861	3.737	3.69	Mg	3.504	3.67	2.818	2.837	2.956	2.962	2.641	2.156	2.057	4.02	Mg	2.501	2.533	2.503	3.03	2.392	2.212	2.206	3.35	3.274	2.923	Mg	2.154	2.185	3.436	3.535	2.168
Ca	0	0.003	0	0	0	0	0.003	0	0	0.003	Ca	0.003	0	0.023	0	0	0.003	0.002	0.002	0.013	0.01	Ca	0.003	0.003	0.003	0	0	0.001	0.001	0.003	0	0	Ca	0.002	0	0	0.011	0.013	0.003	0.009	0	0.01	0.001	Ca	0.001	0.02	0.003	0.003	0.011
Ba	0.034	0	0	0.069	0	0.043	0.038	0.031	0.036	0.045	Ba	0.074	0.038	0.051	0.049	0.04	0.031	0.002	0.031	0.04	0.062	Ba	0.062	0.068	0	0	0	0	0	0	0	0	Ba	0.08	0.026	0.042	0	0	0	0	0	0	0	Ba	0	0	0	0	0
Na	0.068	0.071	0.158	0.116	0.107	0.109	0.111	0.107	0.148	0.134	Na	0.209	0.157	0.117	0.097	0.072	0.261	0.189	0.222	0.063	0.076	Na	0.057	0.058	0.056	0.069	0.056	0.08	0.104	0.066	0.055	0.063	Na	0.045	0.077	0.081	0.057	0.076	0.038	0.069	0.144	0.124	0.073	Na	0.055	0.077	0.166	0.172	0.058
K	1.778	1.808	1.76	1.577	1.775	1.775	1.773	1.775	1.673	1.72	K	1.691	1.687	1.755	1.751	1.802	1.587	1.69	1.623	1.781	1.798	K	1.698	1.777	1.768	1.752	1.771	1.734	1.681	1.741	1.795	1.85	K	1.834	1.819	1.829	1.719	1.701	1.771	1.74	1.666	1.664	1.758	K	1.791	1.766	1.61	1.625	1.741
F	0	0	0.422	0.361	0.284	0	0.25	0.433	0	0.19	F	0	0	0.181	0.334	0.271	0	0	0	0.168	0	F	0.26	0	0	0	0	0	0	0	0	0.431	F	0.276	0.203	0.334	0	0	0	0	0	0	0	F	0	0	0	0	0
Cl	0	0	0	0	0	0	0	0	0	0	Cl	0	0	0	0	0	0	0	0	0	0	Cl	0	0	0	0	0	0	0	0	0	0	Cl	0	0	0	0	0	0	0	0	0	0	Cl	0	0	0	0	0
Rock type: 1: Perovskite-bearing amphibole Pyroxenite (Las Montañetas).											Rock type: 1: Perovskite-bearing amphibole Pyroxenite (Las Montañetas); 2: Perovskite-bearing pyroxenites (Playa de Esquinzo); 3: Playa de Esquinzo Melteigites..											Rock type: 3: Playa de Esquinzo Melteigites; 4: Playa de Tebeto Melteigites; 5: Los Frailes Ijolites-Urtites; 7: Ijolitic breccia (Playa de Esquinzo).											Rock type: 7: Ijolitic breccia (Playa de Esquinzo); 9: Microijolite (Playa de Esquinzo); 11: Biotitic Malignites (Playa del Aguila).											Rock type: 11: Biotitic Malignites (Playa del Aguila).
< indicate below the detection limit.Nd: not determined.											< indicate below the detection limit.Nd: not determined.											< indicate below the detection limit.Nd: not determined.											< indicate below the detection limit.Nd: not determined.											< indicate below the detection limit.Nd: not determined.
[truncated: 95 more columns]
