# Supplementary material
Source: MDPI journal article supplement (https://www.mdpi.com/2075-163X/14/3/295)
Supplement: s1 [file s1 › Table S3.XLS]

## Sheet: Hoja1
Table S3a: Representative analyses (in wt.) and formulae of feldespars from Esquinzo											Table S3b: Representative analyses (in wt.) and formulae of feldespars from Esquinzo											Table S3c: Representative analyses (in wt.) and formulae of feldespars from Esquinzo										Table S3d: Representative analyses (in wt.) and formulae of feldespars from Esquinzo											Table S3f: Representative analyses (in wt.) and formulae of feldespars from Esquinzo
ultralkaline rocks.											ultralkaline rocks.											ultralkaline rocks.										ultralkaline rocks.											ultralkaline rocks.
Sample-Point	E8-01-198	8449-2A-88	8449-2A-89	8449-2A-90	E03-4-1A-55	E03-4-1A-56	E03-4-1A-61	E03-4-1A-62	E03-4-2B-88	E03-4-2B-89	Sample-Point	E03-4-2B-90	E03-4-2B-164	E03-4-2B-165	E03-4-2B-166	E03-4-2B-167	E03-4-1A-172	E03-4-1A-173	E03-4-1A-174	E03-4-1A-175	8438-1A-3	Sample-Point	8438-1A-151	8438-5A-48	8438-5A-49	8438-5A-50	8434-4A-99	8434-4A-100	8434-4A-101	E42-01-151	E42-01-179	Sample-Point	E42-01-182	E2-01-128	E2-01-138	E2-01-141	E29-01-29b	E29-01-99An	E29-01-99Bn	8451-1B-92	8451-1B-94	8451-1B-95	Sample-Point	8451-2B-100	8451-2B-101	8451-2B-98	8451-2B-99	8451-3A-104	8451-3A-105
Rock Type	7	7	7	7	11	11	11	11	11	11	Rock Type	11	11	11	11	11	11	11	11	11	11	Rock Type	11	11	11	11	11	11	11	12	12	Rock Type	12	13	13	13	13	13	13	16	16	16	Rock Type	16	16	16	16	16	16
Plutonic Group	1	1	1	1	1	1	1	1	1	1	Plutonic Group	1	1	1	1	1	1	1	1	1	1	Plutonic Group	1	1	1	1	1	1	1	1	1	Plutonic Group	1	1	1	1	1	1	1	1	1	1	Plutonic Group	1	1	1	1	1	1
Observations											Observations											Observations										Observations											Observations
Location	P, Esquinzo	P,Esquinzo	P,Esquinzo	P,Esquinzo	P,Aguila	P,Aguila	P,Aguila	P,Aguila	P,Aguila	P,Aguila	Location	P,Aguila	P,Aguila	P,Aguila	P,Aguila	P,Aguila	P,Aguila	P,Aguila	P,Aguila	P,Aguila	P,Aguila	Location	P,Aguila	P,Aguila	P,Aguila	P,Aguila	P,Aguila	P,Aguila	P,Aguila	B,Esquinzo	B,Esquinzo	Location	B,Esquinzo	B,Morriña	B,Morriña	B,Morriña	B,Morriña	B,Morriña	B,Morriña	Montañetas	Montañetas	Montañetas	Location	Montañetas	Montañetas	Montañetas	Montañetas	Montañetas	Montañetas
Otros			cristal 1 b	cristal 1 n	cristal 1	cristal 1	cristal 2	cristal 2	cristal 3	cristal 3	Otros	cristal 3					cristal 4	cristal 5	cristal 6	cristal 7	cristal 1	Otros	cristal 1	cristal 2	cristal 2	cristal 2	cristal 1	cristal 1	cristal 1	cristal 1	cristal 2	Otros	cristal 3	cristal 1	cristal 2	cristal 3	cristal 1	cristal 1	cristal 1				Otros
Analysis		F1	F2	F3	F1	F2	F3	F4	Ba1	Ba2	Analysis	Ba3	Ba1	Ba2	Ba3	Ba4	Ba1	Ba2	Ba3	Ba4	F2	Analysis		F1	F2	F3	F1	F2	F3			Analysis					b	n	n	F1	F2	F3	Analysis	F3	F4	F1	F2	F1	F2
SiO2	66.68	64.45	64.16	64.33	63.1	62.93	63.17	62.98	63.02	62.61	SiO2	63	63.97	63.17	63.21	63.57	63.69	63.36	63.2	63.34	64.08	SiO2	64.35	63.64	63.21	64.21	64.39	64.35	64.49	67.13	67.38	SiO2	66.74	66.74	66.49	65.3	62.26	63.78	63.19	64.84	64.35	68.39	SiO2	65.23	65.15	64.78	64.05	62.82	63.33
TiO2	<	<	<	<	<	<	<	<	<	<	TiO2	<	<	<	<	<	<	<	<	<	<	TiO2	<	<	<	<	<	<	<	<	<	TiO2	<	<	<	<	<	<	<	<	<	<	TiO2	<	<	<	<	<	<
Al2O3	18.83	18.45	18.64	18.44	18.84	18.41	18.69	18.81	18.99	18.69	Al2O3	18.6	18.98	18.52	18.75	18.7	18.65	18.61	18.61	18.55	18.55	Al2O3	18.5	18.65	18.21	18.12	18.33	18.13	18.46	18.38	18.55	Al2O3	18.61	18.78	18.42	18.93	17.8	18.44	17.84	18.55	18.43	19.35	Al2O3	18.51	18.41	18.36	18.33	18.5	18.57
FeOT	0.36	0.29	0.33	0.37	0.39	0.38	0.46	0.36	0.46	0.43	FeOT	0.42	0.44	0.38	0.41	0.4	0.52	0.32	0.35	0.45	0.37	FeOT	0.32	0.24	0.31	0.48	0.49	0.46	0.38	0.45	0.34	FeOT	0.3	0.27	0.57	0.35	0.63	0.81	0.76	0.24	0.31	<	FeOT	0.27	0.25	0.26	0.25	0.32	0.31
MnO	<	<	<	<	<	<	<	<	<	<	MnO	<	<	<	<	<	<	<	<	<	<	MnO	<	<	<	<	<	<	<	<	<	MnO	<	<	<	<	<	<	<	<	<	<	MnO	<	<	<	<	<	<
MgO	0.06	<	<	<	<	<	<	<	<	<	MgO	<	<	<	<	<	<	<	<	<	<	MgO	<	<	<	<	<	<	<	0.09	0.04	MgO	0.04	0.07	0.06	<	<	<	0.05	<	<	<	MgO	<	<	<	<	<	<
BaO	<	<	<	<	1.26	0.9	1.69	1.65	1.5	1.83	BaO	1.19	1.58	1.33	1.59	1.15	1.45	1.85	1.32	1.69	0.6	BaO	0.6	<	0.5	<	<	<	<	<	<	BaO	0.72	0.54	<	1.17	<	1.34	1.9	0.93	0.75	<	BaO	1.13	1.01	0.74	0.79	1.19	0.83
CaO	<	<	<	<	<	<	<	<	<	<	CaO	<	<	0.16	<	<	<	<	<	<	<	CaO	<	<	<	<	<	<	<	<	<	CaO	<	<	<	<	<	<	<	<	<	<	CaO	<	<	<	<	<	<
Na2O	1.86	2.3	2.1	2.03	0.81	0.83	0.8	0.82	0.8	0.66	Na2O	0.75	0.83	0.82	0.69	0.78	0.68	0.78	0.72	0.81	1.12	Na2O	1.2	1.21	0.86	1.45	1.48	1.94	1.68	0.95	1.08	Na2O	1.03	1.42	1.33	1.7	1.12	1.07	1.1	1.91	1.92	11.93	Na2O	2.14	1.91	1.79	1.42	2.03	2.1
K2O	13.82	14.27	14.41	14.49	15.66	15.76	15.64	15.75	15.23	15.55	K2O	15.67	15.44	15.65	15.86	15.81	15.67	15.37	15.68	15.46	15.69	K2O	15.35	15.59	16.09	15.37	15.28	14.55	15.18	14.77	14.83	K2O	14.98	14.4	14.44	13.69	14.21	14.23	14.12	14.49	14.49	0.22	K2O	14.02	14.49	14.6	15.07	14.25	14.15
SrO	Nd	<	<	<	0.12	<	<	<	<	0.16	SrO	0.17	<	0.16	<	<	<	<	<	<	0.26	SrO	<	<	<	<	<	<	<	Nd	Nd	SrO	Nd	Nd	Nd	Nd	Nd	Nd	Nd	<	<	<	SrO	<	<	<	<	<	<
Total	101.61	99.77	99.6	99.65	100.06	99.11	100.39	100.35	99.91	99.77	Total	99.63	101.2	100.03	100.49	100.38	100.61	100.22	99.85	100.24	100.41	Total	100.32	99.33	99.18	99.63	99.97	99.33	100.19	101.76	102.22	Total	102.42	102.22	101.31	101.14	96.02	99.67	98.96	100.96	100.25	99.892	Total	101.3	101.22	100.53	99.91	99.11	99.29
Structural formulae on the basis of 8 O											Structural formulae on the basis of 8 O											Structural formulae on the basis of 8 O										Structural formulae on the basis of 8 O											Structural formulae on the basis of 8 O
Si	2.999	2.978	2.968	2.978	2.948	2.961	2.951	2.945	2.946	2.946	Si	2.956	2.955	2.956	2.951	2.959	2.961	2.96	2.96	2.959	2.967	Si	2.977	2.965	2.971	2.985	2.978	2.986	2.975	3.019	3.019	Si	3.007	3.002	3.01	2.981	2.988	2.974	2.983	2.979	2.977	2.993	Si	2.984	2.986	2.985	2.978	2.953	2.96
Ti	0.002	0	0	0	0	0.001	0	0.001	0	0	Ti	0	0	0	0	0	0	0.001	0	0.001	0	Ti	0.001	0	0	0	0.001	0	0.001	0.002	0	Ti	0	0.001	0.001	0	0	0.001	0	0	0	0	Ti	0	0	0	0	0	0
Al	0.997	1.004	1.016	1.005	1.037	1.02	1.028	1.036	1.045	1.036	Al	1.028	1.033	1.02	1.031	1.025	1.021	1.024	1.026	1.021	1.012	Al	1.008	1.023	1.008	0.992	0.998	0.991	1.003	0.973	0.979	Al	0.988	0.995	0.982	1.018	1.006	1.013	0.992	1.004	1.004	0.997	Al	0.997	0.994	0.996	1.004	1.024	1.022
Fe2+	0.014	0.011	0.013	0.014	0.015	0.015	0.018	0.014	0.018	0.017	Fe2+	0.016	0.017	0.015	0.016	0.016	0.02	0.013	0.014	0.018	0.014	Fe2+	0.012	0.009	0.012	0.019	0.019	0.018	0.015	0.017	0.013	Fe2+	0.011	0.01	0.022	0.013	0.025	0.032	0.03	0.009	0.012	0.002	Fe2+	0.01	0.01	0.01	0.01	0.013	0.012
Mn	0.002	0	0	0	0	0	0.002	0.001	0	0	Mn	0	0.001	0	0	0	0	0	0	0	0	Mn	0.001	0.001	0	0	0.001	0	0.002	0	0	Mn	0	0	0	0.001	0.001	0	0	0	0	0	Mn	0	0	0	0	0	0
Mg	0.004	0	0.001	0.001	0.001	0	0	0.001	0	0.001	Mg	0	0	0.001	0.001	0	0	0	0	0	0	Mg	0	0	0	0	0.001	0	0.001	0.006	0.003	Mg	0.003	0.005	0.004	0	0	0.002	0.004	0	0	0.001	Mg	0	0	0	0.001	0.001	0
Ba	0.003	0	0.001	0.001	0.023	0.017	0.031	0.03	0.027	0.034	Ba	0.022	0.029	0.024	0.029	0.021	0.026	0.034	0.024	0.031	0.011	Ba	0.011	0.004	0.009	0	0.001	0.002	0.001	0.001	0.001	Ba	0.013	0.01	0.004	0.021	0	0.024	0.035	0.017	0.014	0	Ba	0.02	0.018	0.013	0.014	0.022	0.015
Ca	0.001	0.001	0	0	0	0	0	0	0	0.001	Ca	0	0	0.008	0	0	0.001	0	0	0	0.001	Ca	0	0	0	0	0	0	0	0.002	0	Ca	0	0	0	0	0.001	0	0	0	0	0.001	Ca	0	0	0	0	0	0
Na	0.162	0.206	0.188	0.182	0.073	0.076	0.072	0.074	0.073	0.06	Na	0.068	0.074	0.074	0.062	0.07	0.061	0.071	0.065	0.073	0.101	Na	0.108	0.109	0.078	0.131	0.133	0.175	0.15	0.083	0.094	Na	0.09	0.124	0.117	0.15	0.104	0.097	0.101	0.17	0.172	1.012	Na	0.19	0.17	0.16	0.128	0.185	0.19
K	0.793	0.841	0.851	0.856	0.933	0.946	0.932	0.94	0.908	0.933	K	0.938	0.91	0.934	0.945	0.939	0.929	0.916	0.937	0.921	0.927	K	0.906	0.927	0.965	0.912	0.901	0.861	0.893	0.847	0.848	K	0.861	0.826	0.834	0.797	0.87	0.846	0.85	0.849	0.855	0.012	K	0.818	0.847	0.858	0.894	0.855	0.844
Sr	Nd	0	0	0	0	0	0	0	0	0	Sr	0	0	0	0	0	0	0	0	0	1e-05	Sr	0	0	0	0	0	0	0	0	0	Sr	Nd	Nd	Nd	Nd	Nd	Nd	Nd	0	0	0	Sr	0	0	0	0	0	0
Cations	4.98	5.041	5.047	5.038	5.053	5.053	5.065	5.072	5.044	5.062	Cations	5.05	5.048	5.056	5.064	5.051	5.045	5.053	5.05	5.055	5.044	Cations	5.035	5.042	5.052	5.039	5.044	5.035	5.05	4.963	4.97	Cations	4.986	4.983	4.978	5.002	4.995	5.013	5.03	5.045	5.048	5.018	Cations	5.039	5.043	5.035	5.043	5.075	5.058
Albite	16.9456	19.6565	18.0943	17.5337	7.25646	7.4364	7.17131	7.29783	7.44139	6.03622	Albite	6.75944	7.52033	7.28346	6.1569	6.93756	6.1554	7.19352	6.48703	7.34406	9.81535	Albite	10.6509	10.5212	7.47843	12.5599	12.8627	16.8919	14.3816	8.90558	9.97877	Albite	9.46372	13.0526	12.3028	15.8395	10.6667	10.2863	10.6204	16.683	16.7478	98.7317	Albite	18.8492	16.7158	15.7171	12.5245	17.7885	18.3752
Anortite	0.104603	0.0954198	0	0	0	0	0	0	0	0.100604	Anortite	0	0	0.787402	0	0	0.100908	0	0	0	0.0971817	Anortite	0	0	0	0	0	0	0	0.214592	0	Anortite	0	0	0	0	0.102564	0	0	0	0	0.097561	Anortite	0	0	0	0	0	0
Orthose	82.9498	80.2481	81.9057	82.4663	92.7435	92.5636	92.8287	92.7022	92.5586	93.8632	Orthose	93.2406	92.4797	91.9291	93.8431	93.0624	93.7437	92.8065	93.513	92.6559	90.0875	Orthose	89.3491	89.4788	92.5216	87.4401	87.1373	83.1081	85.6184	90.8798	90.0212	Orthose	90.5363	86.9474	87.6972	84.1605	89.2308	89.7137	89.3796	83.317	83.2522	1.17073	Orthose	81.1508	83.2842	84.2829	87.4755	82.2115	81.6248
Rock type: 7: Ijolitic breccia (Playa de Esquinzo); 11: Biotitic Malignites (Playa del Aguila).											Rock type: 11: Biotitic Malignites (Playa del Aguila).											Rock type: 11: Biotitic Malignites (Playa del Aguila); 12: Feldespatic ijolites (Playa de Esquinzo).										Rock type: 12: Feldespatic ijolites (Playa de Esquinzo); 13: Feldespatic ijolites (Montaña de la Morriña); 16: Nepheline syenite (Las Montañetas).											Rock type: 16: Nepheline syenite (Las Montañetas).
< indicate below the detection limit.Nd: not determined.											< indicate below the detection limit.Nd: not determined.											< indicate below the detection limit.Nd: not determined.										< indicate below the detection limit.Nd: not determined.											< indicate below the detection limit.Nd: not determined.
[truncated: 76 more columns]
