# Supplementary material
Source: MDPI journal article supplement (https://www.mdpi.com/2075-163X/14/3/295)
Supplement: s1 [file s1 › Table S4.XLS]

## Sheet: Hoja1
Table S4a: Representative analyses (in wt.) and formulae of nephelines from Esquinzo ultralkaline rocks											Table S4b: Representative analyses (in wt.) and formulae of nephelines from Esquinzo ultralkaline rocks
											ultralkaline rocks.
Sample-Point	E73b-01-51	E73b-01-55	E73b-01-62	E73b-01-66	E73b-01-73	OL-24-19	OL-24-21	E13-01-109	E13-01-118	E13-01-83	Sample-Point	E13-01-84	E13-01-92	E13-01-93
Rock Type	19	19	19	19	19	19	19	23	23	23	Rock Type	23	23	23
Plutonic Group	2	2	2	2	2	2	2	3	3	3	Plutonic Group	3	3	3
Observations											Observations
SiO2	46.03	47.12	45.83	44.96	44.46	44.02	39.73	42.86	43.44	43.3	SiO2	43.79	43.94	43.81
TiO2	<	<	<	<	<	<	0.14	<	0.07	<	TiO2	<	<	<
Al2O3	33.57	34.41	33.21	32.22	32.93	32.43	28.88	33.73	33.95	32.9	Al2O3	33.5	33.83	33.84
FeOT	0.64	0.72	0.73	0.73	0.65	1.2	2.1	1.16	1.23	1.69	FeOT	1.42	1.07	1.21
Cr2O3	<	<	<	<	<	<	<	<	<	<	Cr2O3	<	<	<
MnO	<	<	<	<	<	0.08	<	<	<	<	MnO	<	<	<
MgO	0.07	0.04	<	<	<	<	<	0.06	0.07	0.04	MgO	<	0.05	0.06
CaO	<	<	<	<	<	1.14	1.07	0.11	0.18	0.15	CaO	0.15	0.12	0.8
Na2O	14.77	15.13	15.19	15.35	15.49	14.68	13.2	15.15	15.42	15.3	Na2O	14.72	15.32	15.3
K2O	5.87	5.9	5.93	5.89	6.24	5.29	4.11	6.61	6.59	6.49	K2O	7.04	6.45	6.57
Total	100.95	103.32	100.89	99.15	99.77	98.84	89.23	99.68	100.95	99.87	Total	100.62	100.78	101.59
Structural formulae on the basis of 32 O											Structural formulae on the basis of 32 O
Si	8.657	8.651	8.649	8.656	9.015	8.515	8.526	8.288	8.299	8.378	Si	8.392	8.381	8.322
Ti	0	0.004	0	0.004	0	0	0.023	0	0.01	0	Ti	0	0	0.001
Al	7.435	7.44	7.381	7.305	7.864	7.388	7.299	7.682	7.638	7.497	Al	7.561	7.599	7.57
Fe2+	0.101	0.111	0.115	0.118	0.11	0.194	0.377	0.188	0.197	0.273	Fe2+	0.228	0.171	0.192
Cr	0	0	0.001	0	0	0	0	0	0	0	Cr	0	0.002	0
Mn	0.002	0.003	0.003	0	0	0.013	0.003	0.003	0	0	Mn	0.003	0	0
Mg	0.02	0.011	0.003	0	0.003	0.003	0.003	0.017	0.02	0.012	Mg	0.003	0.014	0.017
Ca	0.004	0.004	0.002	0.004	0	0.236	0.246	0.023	0.037	0.031	Ca	0.031	0.025	0.163
Na	5.386	5.386	5.559	5.73	2.453	5.506	5.493	5.681	5.712	5.74	Na	5.47	5.666	5.636
K	1.408	1.382	1.428	1.447	1.614	1.306	1.125	1.631	1.606	1.602	K	1.721	1.569	1.592
Cations	23.013	23	23.141	23.264	21.069	23.174	23.099	23.515	23.519	23.533	Cations	23.412	23.427	23.493
Q	12.0535	12.2125	10.6362	9.34208	7.84024	11.1157	12.6012	6.26257	6.28029	6.59006	Q	7.70732	7.33619	7.03913
Nepheline	69.7158	69.8621	71.1003	72.3829	72.85	71.8485	72.5379	72.8295	73.1499	73.0276	Nepheline	70.2012	72.5624	72.4815
Kalsilite	18.2307	17.9254	18.2635	18.275	19.3098	17.0358	14.861	20.9079	20.5698	20.3824	Kalsilite	22.0915	20.1014	20.4793
Rock type: 19: Nepheline syenite (Los Jablitos); 23: Phonolitic nephelinites.											Rock type: 19: Nepheline syenite (Los Jablitos); 23: Phonolitic nephelinites.	Rock type: 23: Phonolitic nephelinites.
< indicate below the detection limit.Nd: not determined.											< indicate below the detection limit.Nd: not determined.	< indicate below the detection limit.Nd: not determined.
