# Supplementary material
Source: MDPI journal article supplement (https://www.mdpi.com/2075-163X/14/3/295)
Supplement: s1 [file s1 › Table S5.xls]

## Sheet: Hoja1
Table S5a: Representative analyses (in wt.) and formulae of garnets from Esquinzo ultralkaline rocks											Table S5b: Representative analyses (in wt.) and formulae of garnets from Esquinzo ultralkaline rocks											Table S5c: Representative analyses (in wt.) and formulae of garnets from Esquinzo ultralkaline rocks
Sample-Point	E76-01-2A-10	E76-01-2A-11	E76-01-2A-12	E76-01-2A-7	E76-01-2A-8	E76-01-2A-9	E76-01-2B-13	E76-01-2B-14	E03-4-3B-24	E03-4-3B-25	Sample-Point	E03-4-3B-26	7721-1A-34	7721-1A-35	7721-1A-36	7721-1B-32	7721-1B-33	7721-2B-37	7721-2B-38	7721-3A-39	7721-3A-40	Sample-Point	E03-24-1A-10	E03-24-1A-11	E03-24-1A-12	E03-24-1A-13	E-03-26-1-1	E-03-26-1-2	E-03-26-1-3	E-03-26-2-4	E-03-26-2-5	E-03-26-2-6
Rock Type	5	5	5	5	5	5	5	5	11	11	Rock Type	11	15	15	15	15	15	15	15	15	15	Rock Type	15	15	15	15	17	17	17	17	17	17
Plutonic Group	1	1	1	1	1	1	1	1	1	1	Plutonic Group	1	1	1	1	1	1	1	1	1	1	Plutonic Group	1	1	1	1	1	1	1	1	1	1
Observations											Observations				metamorphic							Observations					metamorphic	metamorphic	metamorphic	metamorphic	metamorphic	metamorphic
Color	Brown	Brown	Brown	Brown	Brown	Brown	Brown	Brown	Brown	Brown	Color	Brown	Brown	Brown	White	Brown	Brown	Brown	Brown	Brown	Brown	Color	Ligh brown	Brown	Brown	Brown	White	White	White	White	White	White
SiO2	33.77	34.12	34.2	33.37	34.12	34.62	34	32.84	33.01	33.11	SiO2	32.84	31.2	31.8	37.59	31.63	31.31	32.6	31.64	31.71	28.97	SiO2	31	31.39	30.9	31.36	36.03	34.22	35.18	34.95	36.78	34.55
TiO2	4.94	4.47	5.37	6.5	5.2	4.61	5.11	5.62	7.83	7.58	TiO2	7.79	8.28	8.42	0.01	8.41	8.62	8.09	8.51	7.3	8.96	TiO2	9.67	9.24	10.19	9.17	0.53	1.09	1.47	1.58	1.08	1.42
Al2O3	1.09	0.98	1.36	1.11	1.08	1.22	1.04	1.26	0.61	0.65	Al2O3	0.65	1.04	1.05	15.9	1.1	1.1	2.13	1.09	0.94	1.48	Al2O3	1.47	1.67	1.57	1.74	1.38	2.54	1.19	0.94	1.11	1.06
Fe2O3	25.12	25.33	24.33	24.19	25.22	24.73	24.96	25.05	24.63	24.87	Fe2O3	24.64	24.37	23.44	10.23	24.19	24.48	23.17	24.33	24.73	23.71	Fe2O3	23.98	23.99	23.38	23.63	29.61	26.9	26.65	27.44	25.96	27.06
MnO	0.66	0.55	0.45	0.51	0.63	0.46	0.66	0.46	0.45	0.45	MnO	0.43	0.71	0.7	0.06	0.73	0.73	0.68	0.71	0.78	0.6	MnO	0.62	0.62	0.61	0.58	0.06	0.06	0.07	0.06	0.06	0.06
MgO	0.22	0.22	0.29	0.25	0.2	0.28	0.22	0.26	0.37	0.36	MgO	0.39	0.65	0.67	0.03	0.6	0.61	1.2	0.61	0.59	0.58	MgO	0.59	0.57	0.57	0.67	0.21	0.23	0.28	0.31	0.31	0.27
CaO	32.42	32.93	33.09	32.84	32.39	33.26	32.3	33.09	32.33	32.44	CaO	32.71	30.87	31.03	36.46	30.76	30.99	29.36	30.8	30.81	31.96	CaO	31.19	31.26	31.07	31.56	32.18	33.84	34.11	33.96	34.58	34.69
Na2O	0.29	0.23	0.22	0.26	0.26	0.23	0.3	0.22	0.36	0.36	Na2O	0.3	0.34	0.29	<	0.32	0.31	0.35	0.34	0.3	0.19	Na2O	0.25	0.25	0.25	0.23	0.02	0.01	0	0.09	0.1	0
K2O	<	<	<	0.01	0.02	0.01	<	<	0.01	<	K2O	<	<	<	<	<	<	0.02	<	<	<	K2O	<	<	<	<	<	<	<	0.02	0.02	<
Y2O3	0.11	0.03	0.02	0.01	0.02	0.02	0.13	0.02	0.02	0.04	Y2O3	0.05	0.34	0.32	<	0.29	0.3	0.29	0.33	0.34	0.1	Y2O3	0.05	0.04	0.09	0.03	0.02	0.02	0.01	0.02	0	0.01
La2O3	<	<	<	<	<	<	<	<	<	<	La2O3	<	<	<	<	<	<	<	<	<	<	La2O3	0.01	<	0.01	0.02	<	<	0.01	0.01	0.01	<
Ce2O3	0.01	0.01	0.02	0.02	0.01	0.02	0.02	0.02	0.01	0.02	Ce2O3	0.01	0.03	0.02	<	0.02	0.02	0.03	0.02	0.02	0.05	Ce2O3	0.07	0.06	0.11	0.08	0.02	0.03	0.04	0.02	0.02	0.02
Sm2O3	0.02	0.02	0.01	0.02	0.01	0.01	0.02	0.2	0.03	0.02	Sm2O3	0.02	0.04	0.04	0.01	0.04	0.04	0.04	0.03	0.03	0.02	Sm2O3	0.04	0.05	0.02	0.03	0.04	0.03	0.03	0.04	0.03	0.04
Nd2O3	<	<	<	<	<	<	<	<	<	<	Nd2O3	0.01	0.04	0.04	0.01	0.04	0.04	0.04	0.03	0.02	0.03	Nd2O3	0.07	0.05	0.11	0.06	<	0.01	<	<	<	<
Gd2O3	<	<	<	<	<	<	0.01	<	<	0.01	Gd2O3	<	0.04	0.05	<	0.05	0.04	0.05	0.05	0.05	0.03	Gd2O3	0.01	0.01	0.02	0	<	0.01	0	0	0	0
Dy2O3	<	<	<	<	<	<	<	<	<	<	Dy2O3	<	0.04	0.04	<	0.02	0.04	0.03	0.03	0.04	0.01	Dy2O3	0.01	0	0.01	<	<	<	<	<	<	<
Ho2O3	<	<	<	<	<	<	<	<	<	<	Ho2O3	<	<	<	<	<	<	<	<	<	<	Ho2O3	<	<	<	<	<	<	<	<	<	<
Er2O3	0.11	0.1	0.1	0.1	0.1	0.1	0.1	0.09	0.1	0.1	Er2O3	0.1	0.13	0.12	0.04	0.13	0.12	0.12	0.13	0.13	0.11	Er2O3	0.09	0.09	0.09	0.09	0.09	0.09	0.1	0.11	0.11	0.11
Yb2O3	0.01	<	<	<	<	<	<	<	<	<	Yb2O3	<	0.02	0.02	0.06	0.02	0.02	0.03	0.01	0.03	0.01	Yb2O3	<	<	<	<	<	<	<	<	<	<
SrO	<	<	<	<	<	<	<	<	<	<	SrO	<	<	<	<	<	<	<	<	<	<	SrO	<	<	<	<	<	<	<	<	<	<
V2O3	0.6	0.36	0.21	0.26	0.35	0.16	0.59	0.22	0.33	0.34	V2O3	0.31	0.24	0.24	0.01	0.23	0.23	0.21	0.22	0.27	0.18	V2O3	0.19	0.17	0.17	0.16	0.21	0.21	0.19	0.13	0.13	0.13
ZrO2	0.78	0.48	0.49	0.59	0.58	0.59	0.83	0.4	0.44	0.29	ZrO2	0.46	1.92	1.8	0.03	1.74	1.61	1.69	1.86	1.85	0.97	ZrO2	1.21	1.02	1.43	0.93	0.11	0.09	0.34	0.51	0.39	0.44
Nb2O3	<	0.02	0.06	0.07	<	0.02	<	0.09	0.03	0	Nb2O3	0.04	<	<	0.01	<	<	<	<	<	0.02	Nb2O3	0.03	0.01	0.07	0.03	<	0.01	0.01	<	<	<
Total	100.15	99.85	100.22	100.11	100.19	100.34	100.29	99.84	100.56	100.64	Total	100.75	100.3	100.09	100.45	100.32	100.61	100.13	100.74	99.94	97.98	Total	100.55	100.49	100.67	100.37	100.51	99.39	99.68	100.19	100.69	99.86
Si	2.84	2.87	2.86	2.8	2.86	2.89	2.85	2.78	2.76	2.76	Si	2.74	2.64	2.68	2.93	2.67	2.64	2.72	2.66	2.69	2.52	Si	2.6	2.63	2.59	2.63	3	2.89	2.96	2.94	3.05	2.92
Ti	0.312	0.283	0.337	0.41	0.327	0.289	0.322	0.357	0.492	0.476	Ti	0.49	0.527	0.534	0.001	0.533	0.546	0.508	0.538	0.466	0.586	Ti	0.611	0.582	0.643	0.578	0.033	0.069	0.093	0.1	0.067	0.09
Al	0.108	0.097	0.134	0.11	0.106	0.12	0.103	0.125	0.06	0.064	Al	0.064	0.104	0.104	1.458	0.109	0.109	0.209	0.108	0.094	0.152	Al	0.145	0.165	0.155	0.172	0.135	0.253	0.118	0.093	0.108	0.105
Fe3+	1.586	1.602	1.527	1.525	1.587	1.551	1.572	1.592	1.547	1.561	Fe3+	1.547	1.55	1.487	0.599	1.533	1.55	1.453	1.536	1.577	1.549	Fe3+	1.513	1.511	1.473	1.489	1.854	1.708	1.687	1.734	1.617	1.719
Mn	0.047	0.039	0.032	0.036	0.045	0.033	0.047	0.033	0.032	0.032	Mn	0.03	0.051	0.05	0.004	0.052	0.052	0.048	0.051	0.056	0.044	Mn	0.044	0.044	0.043	0.041	0.004	0.004	0.005	0.004	0.004	0.004
Mg	0.028	0.028	0.036	0.031	0.025	0.035	0.027	0.033	0.046	0.045	Mg	0.049	0.082	0.084	0.003	0.075	0.077	0.149	0.076	0.075	0.075	Mg	0.074	0.071	0.071	0.084	0.026	0.029	0.035	0.039	0.038	0.034
Ca	2.917	2.968	2.961	2.951	2.905	2.973	2.899	2.997	2.895	2.902	Ca	2.928	2.798	2.805	3.041	2.778	2.796	2.624	2.772	2.8	2.977	Ca	2.805	2.806	2.791	2.835	2.871	3.062	3.077	3.059	3.07	3.14
Na	0.047	0.038	0.036	0.042	0.042	0.037	0.049	0.036	0.058	0.058	Na	0.049	0.056	0.047	0	0.052	0.051	0.057	0.055	0.049	0.032	Na	0.041	0.041	0.041	0.037	0.003	0.002	0	0.015	0.016	0
K	0	0	0	0	0	0	0	0	0	0	K	0	0	0	0	0	0	0	0	0	0	K	0	0	0	0	0	0	0	0	0	0
Y	0.005	0.001	0.001	0	0.001	0.001	0.006	0.001	0.001	0.002	Y	0.002	0.015	0.014	0	0.013	0.013	0.013	0.015	0.015	0.005	Y	0.002	0.002	0.004	0.001	0.001	0.001	0	0.001	0	0
La	0	0	0	0	0	0	0	0	0	0	La	0	0	0	0	0	0	0	0	0	0	La	0	0	0	0.001	0	0	0	0	0	0
Ce	0	0	0.001	0.001	0	0.001	0.001	0.001	0	0.001	Ce	0	0.001	0.001	0	0.001	0.001	0.001	0.001	0.001	0.002	Ce	0.002	0.002	0.003	0.002	0.001	0.001	0.001	0.001	0.001	0.001
Sm	0.001	0.001	0	0.001	0	0	0.001	0.006	0.001	0.001	Sm	0.001	0.001	0.001	0	0.001	0.001	0.001	0.001	0.001	0.001	Sm	0.001	0.001	0.001	0.001	0.001	0.001	0.001	0.001	0.001	0.001
Nd	0	0	0	0	0	0	0	0	0	0	Nd	0	0.001	0.001	0	0.001	0.001	0.001	0.001	0.001	0.001	Nd	0.002	0.001	0.003	0.002	0	0	0	0	0	0
Gd	0	0	0	0	0	0	0	0	0	0	Gd	0	0.001	0.001	0	0.001	0.001	0.001	0.001	0.001	0.001	Gd	0	0	0.001	0	0	0	0	0	0	0
Dy	0	0	0	0	0	0	0	0	0	0	Dy	0	0.001	0.001	0	0.001	0.001	0.001	0.001	0.001	0	Dy	0	0	0	0	0	0	0	0	0	0
Ho	0	0	0	0	0	0	0	0	0	0	Ho	0	0	0	0	0	0	0	0	0	0	Ho	0	0	0	0	0	0	0	0	0	0
Er	0	0	0	0	0	0	0	0	0	0	Er	0	0	0	0	0	0	0	0	0	0	Er	0	0	0	0	0	0	0	0	0	0
Yb	0	0	0	0	0	0	0	0	0	0	Yb	0	0	0	0	0	0	0	0	0	0	Yb	0	0	0	0	0	0	0	0	0	0
Sr	0	0	0	0	0	0	0	0	0	0	Sr	0	0	0	0	0	0	0	0	0	0	Sr	0	0	0	0	0	0	0	0	0	0
V	0.04	0.02	0.01	0.02	0.02	0.01	0.04	0.01	0.02	0.02	V	0.02	0.02	0.02	0	0.02	0.02	0.01	0.01	0.02	0.01	V	0.01	0.01	0.01	0.01	0.01	0.01	0.01	0.01	0.01	0.01
Zr	0.03	0.02	0.02	0.02	0.02	0.02	0.03	0.02	0.02	0.01	Zr	0.02	0.08	0.07	0	0.07	0.07	0.07	0.08	0.08	0.04	Zr	0.05	0.04	0.06	0.04	0	0	0.01	0.02	0.02	0.02
Nb	0	0	0	0	0	0	0	0	0	0	Nb	0	0	0	0	0	0	0	0	0	0	Nb	0	0	0	0	0	0	0	0	0	0
Rock type: 5: Los Frailes Ijolites-Urtites; 11: Biotitic Malignites (Playa del Aguila).											Rock type: 11: Biotitic Malignites (Playa del Aguila); 15: Pegmatite ijolite (Las Montañetas)..											Rock type: 15: Pegmatite ijolite (Las Montañetas); 17: Carbonatites and Silico-carbonatites (Las Montañetas).
< indicate below the detection limit.Nd: not determined.											< indicate below the detection limit.Nd: not determined.											< indicate below the detection limit.Nd: not determined.
