# Supplementary material
Source: MDPI journal article supplement (https://www.mdpi.com/2075-163X/14/3/295)
Supplement: s1 [file s1 › Table S6.xls]

## Sheet: Hoja1
Table S6a: Representative analyses (in wt.) and formulae of amphiboles from Esquinzo ultralkaline rocks											Table S6b: Representative analyses (in wt.) and formulae of amphiboles from Esquinzo ultralkaline rocks
Sample-Point	E70-01-124	E70-01-126	E70-01-122	E70-01-130	E70-01-136	E70-01-138	7720-32	7720-33	8419-2A-62	8419-2A-66	Sample-Point	8419-2A-64	8419-2A-65	8419-3A-69	8419-1A-54	8419-1A-55
Rock Type	1	1	1	1	1	1	1	1	4	4	Rock Type	4	4	4	4	4
Plutonic GroupLocation	1	1	1	1	1	1	1	1	1	1	Plutonic GroupLocation	1	1	1	1	1
Observations			core	rim					core	core	Observations	rim	rim
Color	dark green	dark green	dark green	dark green	dark green	dark green	dark green	dark green	red	red	Color	red	green	red	red	red
Type	1	1	1	1	1	1	1	1	2	2	Tipo de anfibol según análisis químico	1	3	2	3	3
SiO2	39.29	39.52	40.5	39.95	39.64	39.14	40.35	40.12	38.52	38.07	SiO2	39.49	38.82	38.58	39.55	39.12
TiO2	4.04	4.08	2.86	3.67	3.7	4.22	4.01	4.08	5.76	5.34	TiO2	4.1	2.72	4.68	3.33	3.33
Al2O3	11.78	11.92	11.75	12.16	11.89	12.09	11.91	11.86	13.06	13.33	Al2O3	12.41	12.17	12.76	11.6	11.88
FeOT	11.21	10.77	11.3	11.83	12.52	11.39	10.32	10.09	10.72	13.64	FeOT	15.85	19.84	16.15	17.78	17.35
Cr2O3	<	<	<	<	<	<	<	<	<	<	Cr2O3	<	<	<	<	<
MnO	0.21	0.13	0.12	0.17	0.19	0.14	0.14	0.2	0.15	0.27	MnO	0.4	0.49	0.34	0.46	0.41
MgO	13.85	13.79	13.62	13.22	13.41	13.33	14.42	14.11	12.88	10.75	MgO	10.08	8.11	9.78	9.41	9.27
CaO	12.37	12.52	12.51	12.49	12.35	12.39	12.03	11.73	11.99	11.63	CaO	11.37	10.8	11.47	10.87	11
Na2O	2.78	2.76	2.6	2.58	2.74	2.7	2.67	2.73	2.47	2.67	Na2O	2.62	2.84	2.54	2.74	2.79
K2O	1.46	1.39	1.47	1.47	1.51	1.53	1.36	1.31	1.84	1.84	K2O	1.93	1.93	1.81	1.96	1.9
F	<	<	<	<	<	<	<	<	<	<	F	<	<	<	<	<
Total	96.99	96.82	96.71	97.54	97.95	96.93	97.21	96.23	97.34	97.51	Total	98.17	97.72	98.11	97.7	97.05
Structural formulae on the basis of 23 O											Structural formulae on the basis of 23 O
Si	5.92324	5.94193	6.09551	5.98655	5.9457	5.90745	5.99376	6.01634	5.7694	5.77346	Si	5.97751	5.98419	5.86834	6.05139	6.02902
Ti	0.458051	0.461345	0.323725	0.413601	0.417375	0.479013	0.447977	0.460137	0.648817	0.609045	Ti	0.466737	0.315336	0.53537	0.383185	0.385964
Al	2.09347	2.11267	2.08467	2.14802	2.1023	2.15105	2.08551	2.09653	2.30585	2.38302	Al	2.21436	2.21149	2.28796	2.09224	2.15828
Fe2+	1.41338	1.35426	1.42236	1.48259	1.57054	1.43773	1.28207	1.26543	1.34281	1.72999	Fe2+	2.00649	2.5578	2.05447	2.27518	2.23626
Cr	0	0	0	0	0	0	0	0	0	0	Cr	0	0	0	0	0
Mn	0.0268168	0.0165564	0.0152984	0.0215784	0.0241398	0.0178986	0.0176155	0.0254046	0.0190303	0.0346839	Mn	0.0512866	0.0639819	0.0438069	0.059618	0.0535233
Mg	3.11178	3.08999	3.05502	2.95238	2.99764	2.99841	3.19229	3.15341	2.87503	2.42965	Mg	2.27392	1.86317	2.21704	2.14575	2.12916
Ca	1.99821	2.01701	2.01747	2.00547	1.98486	2.00376	1.91477	1.88479	1.92423	1.88985	Ca	1.84411	1.78389	1.86944	1.7821	1.8165
Na	0.812622	0.804612	0.758743	0.749629	0.796868	0.79015	0.769013	0.793781	0.717312	0.785111	Na	0.768955	0.848857	0.749123	0.812878	0.833717
K	0.280809	0.266629	0.282263	0.281034	0.288953	0.294613	0.257737	0.250625	0.351596	0.356002	K	0.37271	0.379567	0.351247	0.382601	0.373579
F	0	0	0	0	0	0	0	0	0	0	F	0	0	0	0	0
Rock type: 1: Perovskite-bearing amphibole Pyroxenite (Las Montañetas); 4: Playa de Tebeto Melteigites.											Rock type: 4: Playa de Tebeto Melteigites.
< indicate below the detection limit.Nd: not determined. Type: 1: Magnesio-hastingsite; 2: Kaersutite; 3: Hastingsite.											< indicate below the detection limit.Nd: not determined. Type: 1: Magnesio-hastingsite; 2: Kaersutite; 3: Hastingsite.
