# Supplementary material
Source: MDPI journal article supplement (https://www.mdpi.com/2075-163X/14/3/295)
Supplement: s1 [file s1 › Table S7.xls]

## Sheet: Hoja1
Table S7: Representative analyses (in wt.) and formulae of titanites from Esquinzo
ultralkaline rocks.
Sample-Point	E03-4-2A-18b	E03-4-2A-19n	E03-4-2A-20b	E03-4-2B-21n	E03-4-2B-22b	E03-4-3B-23	7721-1B-29n	7721-1B-30b	7721-1B-31b
Rock Type	11	11	11	11	11	11	15	15	15
Plutonic Group	1	1	1	1	1	1	1	1	1
Observations	UNK	UNK	UNK	UNK	UNK	UNK	UNK	UNK	UNK
Otros	rim	core	rim				core	rim	rim
SiO2	30 ,05	30 ,32	30 ,2	30 ,33	30 ,09	30 ,51	30 ,24	30 ,04	30 ,54
TiO2	36 ,78	37 ,67	37 ,2	38 ,31	37 ,07	37 ,52	37 ,3	37 ,04	36 ,6
Al2O3	1 ,04	1 ,05	0 ,89	1 ,1	1 ,02	1	0 ,45	0 ,44	0 ,53
FeOT	2 ,03	1 ,55	1 ,81	1 ,52	1 ,94	1 ,43	1 ,4	1 ,42	1 ,9
MnO	0 ,03	0 ,04	0 ,04	0 ,03	0 ,03	0 ,04	0 ,03	0 ,03	0 ,04
MgO	0 ,04	0 ,05	0 ,04	0 ,06	0 ,04	0 ,05	0 ,02	0 ,03	0 ,04
CaO	28 ,23	28 ,68	28 ,36	28 ,26	28 ,55	28 ,34	27 ,41	27 ,42	27 ,51
Na2O	0 ,05	0 ,05	0 ,07	0 ,04	0 ,05	0 ,04	0 ,03	0 ,01	0 ,01
K2O	<	<	<	<	<	0 ,01	0 ,01	<	0 ,01
V2O3	0 ,22	0 ,21	0 ,22	0 ,2	0 ,22	0 ,19	0 ,19	0 ,2	0 ,2
Y2O3	0 ,04	0 ,04	0 ,03	0 ,03	0 ,03	0 ,02	0 ,07	0 ,08	0 ,06
La2O3	0 ,13	0 ,03	0 ,15	<	0 ,13	<	0 ,07	0 ,08	0 ,05
Ce2O3	0 ,38	0 ,08	0 ,38	0 ,02	0 ,38	0 ,03	0 ,24	0 ,26	0 ,24
Pr2O3	0 ,04	<	0 ,04	<	0 ,05	<	0 ,03	0 ,04	0 ,04
Sm2O3	0 ,03	<	0 ,01	<	0 ,02	0	0 ,04	0 ,03	0 ,04
Nd2O3	0 ,18	0 ,04	0 ,16	<	0 ,19	0	0 ,21	0 ,18	0 ,2
SrO	0 ,12	0 ,1	0 ,14	0 ,05	0 ,12	0 ,07	0 ,05	0 ,05	0 ,05
ZrO2	0 ,39	0 ,47	0 ,32	0 ,39	0 ,4	0 ,45	1 ,59	2 ,05	1 ,89
Nb2O5	0 ,18	0 ,18	0 ,29	0 ,09	0 ,2	0 ,12	0 ,31	0 ,23	0 ,25
Total	99.96	100.56	100.35	100.23	100.53	99.81	99.68	99.63	100.19
Structural formulae on the basis of 20 O
Si	3.97	3.97	3.97	3.96	3.96	4.01	4.01	3.99	4.03
Ti	3.656	3.706	3.683	3.762	3.667	3.708	3.716	3.701	3.632
Al	0.162	0.162	0.138	0.169	0.158	0.155	0.07	0.069	0.082
Fe3+	0.202	0.152	0.179	0.149	0.192	0.141	0.139	0.142	0.188
Mn	0.003	0.004	0.004	0.003	0.003	0.004	0.003	0.003	0.004
Mg	0.008	0.01	0.008	0.012	0.008	0.01	0.004	0.006	0.008
Ca	3.998	4.019	3.999	3.953	4.022	3.989	3.89	3.902	3.889
Na	0.013	0.013	0.018	0.01	0.013	0.01	0.008	0.003	0.003
K	0	0	0	0	0	0	0	0	0
V	0.02	0.02	0.02	0.02	0.02	0.02	0.02	0.02	0.02
Y	0.003	0.003	0.002	0.002	0.002	0.001	0.005	0.006	0.004
La	0.006	0.001	0.007	0	0.006	0	0.003	0.004	0.002
Ce	0.018	0.004	0.018	0.001	0.018	0.001	0.012	0.013	0.012
Pr	0.002	0	0.002	0	0.002	0	0.001	0.002	0.002
Sm	0.001	0	0	0	0.001	0	0.002	0.001	0.002
Nd	0.008	0.002	0.008	0	0.009	0	0.01	0.009	0.009
Sr	0.009	0.008	0.011	0.004	0.009	0.005	0.004	0.004	0.004
Zr	0.03	0.03	0.02	0.02	0.03	0.03	0.1	0.13	0.12
Nb	0.01	0.01	0.02	0.01	0.01	0.01	0.02	0.01	0.01
Rock type: 11: Biotitic Malignites (Playa del Aguila); 15: Pegmatite ijolite (Las Montañetas).
< indicate below the detection limit.Nd: not determined.
