# Supplementary material
Source: MDPI journal article supplement (https://www.mdpi.com/2075-163X/14/3/295)
Supplement: s1 [file s1 › Table S8-S12.xls]

## Sheet: Supplementary Material Table 8
Supplementary Material Table 8a: Representative analyses (in wt.) and formulae of calcites from Esquinzo ultralkaline rocks											Supplementary Material Table 8b: Representative analyses (in wt.) and formulae of calcites from Esquinzo ultralkaline rocks											Supplementary Material Table 8c: Representative analyses (in wt.) and formulae of calcites from Esquinzo ultralkaline rocks											Supplementary Material Table 8d: Representative analyses (in wt.) and formulae of calcites from Esquinzo ultralkaline rocks											Supplementary Material Table 8e: Representative analyses (in wt.) and formulae of calcites from Esquinzo ultralkaline rocks
Sample-Point	E76-01-1A-70	E76-01-1A-71	E76-01-1A-72	E76-01-2A-87	E76-01-2B-82	E42-01-171	8434-2D-88	8434-2D-89	8438-1B-10	8438-1B-11	Sample-Point	8438-2A-23	8438-3A-33	8438-4B-43	8438-4B-44	E2-01-133	7721-1A-115	7721-1B-119	7721-2A-131	7721-3A-140	7721-3A-141	Sample-Point	7723-143	7723-146	7723-154	E67-01-1A-95	E67-01-1A-96	E67-01-4A-113	8451-1A-84	8451-1A-85	8451-1A-86	8451-1A-87	Sample-Point	8451-1B-90	8451-1B-93	E60-01-1A-1	E60-01-2A-9	E60-01-3A-20	E60-01-3A-21	E03-26-1B-36	E03-26-1B-39	E03-26-1B-40	E03-26-3A-50	Sample-Point	E56-01-64	E56-01-65	E56-01-70	E56-01-71	E56-01-78
Rock Type	5	5	5	5	5	6	11	11	11	11	Rock Type	11	11	11	11	13	15	15	15	15	15	Rock Type	15	15	15	15	15	15	16	16	16	16	Rock Type	16	16	16	16	16	16	17	17	17	17	Rock Type	17	17	17	17	17
Plutonic Group	1	1	1	1	1	1	1	1	1	1	Plutonic Group	1	1	1	1	1	1	1	1	1	1	Plutonic Group	1	1	1	1	1	1	1	1	1	1	Plutonic Group	1	1	1	1	1	1	1	1	1	1	Plutonic Group	1	1	1	1	1
Observations	cal 1	cal 2	cal 3			2002	cal 1	cal 2	cal 1	cal 2	Observations			cal 1	cal 2	2002						Observations	2002	2002	2002	cal 1	cal 2		cal 1	cal 2	cal 3	cal 4	Observations					cal 1	cal 2		cal 1	cal 2		Observations	2002	2002	2002	2002	2002
Color	Esquinzo	Esquinzo	Esquinzo	Esquinzo	Esquinzo	Esquinzo	Esquinzo	Esquinzo	P ,Aguil	P ,Aguil	Color	P ,Aguil	P ,Aguil	P ,Aguil	P ,Aguil	Esquinzo	Montañ	Montañ	Montañ	Montañ	Montañ	Color	Esquinzo	Esquinzo	Esquinzo	Montañ	Montañ	Montañ	Esquinzo	Esquinzo	Esquinzo	Esquinzo	Color	Esquinzo	Esquinzo	Esquinzo	Esquinzo	Esquinzo	Esquinzo	Esquinzo	Esquinzo	Esquinzo	Esquinzo	Color	Esquinzo	Esquinzo	Esquinzo	Esquinzo	Esquinzo
Mineral	calcite	calcite	calcite	calcite	calcite	calcite	calcite	calcite	calcite	calcite	Mineral	calcite	calcite	calcite	calcite	calcite	calcite	calcite	calcite	calcite	calcite	Mineral	calcite	calcite	calcite	calcite	calcite	calcite	calcite	calcite	calcite	calcite	Mineral	calcite	Mg-calcite	calcite	calcite	calcite	calcite	calcite	calcite	calcite	calcite	Mineral	calcite	calcite	calcite	calcite	calcite
SiO2	<	<	<	<	<	<	<	<	<	<	SiO2	<	<	<	<	<	<	<	<	<	<	SiO2	<	<	<	<	<	<	<	<	<	<	SiO2	<	0.06	<	<	<	<	0.79	1.86	0.5	<	SiO2	<	<	<	<	<
TiO2	<	<	<	<	<	<	<	<	<	<	TiO2	<	<	<	<	<	<	<	<	<	<	TiO2	<	<	<	<	<	<	<	<	<	<	TiO2	<	<	<	<	<	<	<	<	<	<	TiO2	<	<	<	<	<
Al2O3	<	<	<	<	<	<	<	<	<	<	Al2O3	<	<	<	<	<	<	<	<	<	<	Al2O3	<	<	<	<	<	<	<	<	<	<	Al2O3	<	<	<	<	<	<	0.18	0.09	<	<	Al2O3	<	<	<	<	<
Cr2O3	<	<	<	<	<	<	<	<	<	<	Cr2O3	<	<	<	<	<	<	<	<	<	<	Cr2O3	<	<	<	<	<	<	<	<	<	<	Cr2O3	<	<	<	<	<	<	<	<	<	<	Cr2O3	<	<	<	<	<
FeO	0.1	<	<	0.1	0.1	0.14	0.14	<	0.13	0.1	FeO	<	<	0.11	0.15	0.206	<	<	<	<	<	FeO	<	<	<	<	<	<	<	<	<	<	FeO	<	1.97	<	<	0.11	<	1.25	0.18	0.15	0.18	FeO	0.3	<	0.133	0.17	0.178
MnO	0.11	0.15	0.09	0.17	0.24	0.14	0.18	0.27	0.2	0.17	MnO	0.15	0.17	0.19	0.14	0.426	<	0.15	0.08	<	<	MnO	<	<	0.2	0.16	0.12	0.16	0.13	0.26	0.22	0.22	MnO	0.18	1.33	0.12	0.1	0.12	0.11	0.75	<	<	<	MnO	0.11	<	0.128	0.42	0.376
MgO	0.07	<	0.09	0.07	<	<	0.11	0.09	<	0.1	MgO	<	<	0.07	0.08	<	0.08	<	0.11	<	<	MgO	<	<	0.09	0.1	0.09	0.09	0.09	0.1	0.11	0.07	MgO	0.08	18.59	0.08	<	0.07	<	0.42	<	0.14	<	MgO	0.09	<	<	0.068	<
CaO	60.62	58.25	59.68	57.68	58.72	38.19	62.02	62.82	59.57	59.08	CaO	56.58	59.77	60.75	57.14	58.375	61.27	59.14	60.63	59.27	54.43	CaO	54.37	54.73	56.74	55.6	54.57	60.67	60.12	58.95	59.66	60.43	CaO	59.45	38.12	58.88	57.74	62.01	60.35	55.14	53.22	53.27	58.28	CaO	56.55	56.64	52.77	56.774	57.043
Na2O	<	<	<	<	<	<	<	<	<	<	Na2O	<	<	<	<	0.043	<	<	<	<	<	Na2O	<	<	0.04	<	<	<	<	<	<	<	Na2O	<	<	<	<	<	<	<	<	<	<	Na2O	<	<	<	<	<
K2O	<	<	<	<	<	0.09	<	<	<	<	K2O	<	<	<	<	<	<	<	<	<	<	K2O	<	<	<	<	<	<	<	<	<	<	K2O	<	0.04	<	<	<	<	<	<	<	<	K2O	<	<	<	<	<
NiO	<	<	<	<	<	<	<	<	<	<	NiO	<	<	<	<	<	<	<	<	<	<	NiO	<	<	<	<	<	<	<	<	<	<	NiO	<	<	<	<	<	<	<	<	<	<	NiO	<	<	<	<	<
SrO	4.55	8.95	4.36	4.12	5.45	5.52	0.43	1.25	1.35	1.31	SrO	3.6	2.47	3.13	2.91	1.842	1.78	0.31	1.71	1.79	0.42	SrO	1.96	1.88	1.78	1.82	1.96	1.97	2.45	1.99	2.18	2.41	SrO	2.09	0.36	2.62	2.55	2.54	2.41	0.31	0.6	1.88	0.4	SrO	0.94	1.26	1.531	0.95	0.911
BaO	<	<	<	<	<	<	<	<	<	<	BaO	<	<	<	<	<	<	<	<	<	<	BaO	<	<	<	<	<	<	<	<	<	<	BaO	<	<	<	<	<	<	<	<	<	<	BaO	<	<	<	<	<
Ce2O3	<	<	<	<	<	<	<	<	<	<	Ce2O3	<	<	<	<	<	<	<	<	<	<	Ce2O3	<	<	<	<	<	<	<	<	<	<	Ce2O3	<	<	<	<	<	<	<	<	<	<	Ce2O3	<	<	<	<	<
Total	65.45	67.35	64.22	62.14	64.51	44.08	62.88	64.45	61.25	60.76	Total	60.33	62.41	64.25	60.42	60.9	63.03	59.59	62.6	61.13	54.89	Total	56.33	56.61	58.85	57.68	56.74	62.89	62.79	61.3	62.17	63.13	Total	61.8	60.97	61.7	60.39	64.85	62.87	58.86	55.95	55.94	58.87	Total	57.99	57.9	54.56	58.39	58.62
Structural formulae on the basis of 6 O											Structural formulae on the basis of 6 O											Structural formulae on the basis of 6 O											Structural formulae on the basis of 6 O											Structural formulae on the basis of 6 O
Si	0.00264611	0	0	0	0	0.00269251	0.00267184	0.000874474	0	0.000929885	Si	0.00189966	0.00181793	0	0	0	0.00179086	0.00469323	0.000904161	0.000925945	0.00204113	Si	0	0	0.00288102	0.00196526	0	0.000899345	0.00271622	0.00185045	0.000913611	0	Si	0	0.00501729	0	0.00188443	0	0.000903142	0.0745432	0.181194	0.0502983	0.00285505	Si	0	0	0	0	0.00394848
Ti	0	0	0	0	0	0	0.0006698	0.000657661	0	0	Ti	0	0.0020508	0	0	0	0	0.000705923	0	0.000696371	0	Ti	0	0	0.000722239	0	0.000752037	0	0	0	0	0	Ti	0	0	0	0	0	0	0.00141927	0.00146527	0	0.00143146	Ti	0	0	0	0	0
Al	0.00103975	0	0.00211545	0	0.00212253	0	0	0.00309252	0.00217469	0	Al	0.00111967	0.00107149	0	0	0	0.00105554	0	0	0	0	Al	0	0	0.00339618	0.00347501	0.00117877	0.00117877	0.00213461	0.00218133	0.00107698	0.00318936	Al	0.00216689	0.00197148	0.00108931	0.00222139	0	0.0031939	0.0200215	0.0103352	0.00112186	0.00112186	Al	0.0034266	0	0	0.0031893	0.00279274
Cr	0	0	0	0	0	0.00212836	0.000704008	0	0.00145828	0.000735051	Cr	0	0	0.000704343	0.00224251	0	0	0	0	0.00292774	0.00322692	Cr	0	0	0	0	0	0.00213273	0.000715702	0.00146273	0	0	Cr	0	0	0	0	0	0	0.00149176	0.0015401	0	0.00150457	Cr	0.00153185	0	0	0.00259693	0
Fe2+	0.0073767	0.00369051	0.00369051	0.0077554	0.00752933	0.0157627	0.0104278	0	0.0100286	0.00777687	Fe2+	0	0	0.00819717	0.011863	0.0150184	0.00149775	0.00314005	0.00226852	0.00309757	0.00309757	Fe2+	0	0	0	0.0016436	0	0	0	0.00154758	0	0	Fe2+	0	0.137772	0.00386415	0.000788001	0.00807546	0.00453193	0.098643	0.0146649	0.0126197	0.0143265	Fe2+	0.0243105	0	0.0115418	0.0137378	0.0143365
Mn	0.00821845	0.0112136	0.00684042	0.0133533	0.0183022	0.0159649	0.0135792	0.0199996	0.0156266	0.0133903	Mn	0.0120683	0.013089	0.0143404	0.0112141	0.0314559	0.00455087	0.0119263	0.00612699	0.00156865	0	Mn	0	0	0.0162692	0.0133175	0.0101643	0.0121887	0.00997008	0.0203766	0.0170253	0.0168063	Mn	0.0140135	0.0942065	0.00939293	0.00798109	0.0089226	0.00841511	0.059945	0.00330068	0.00170422	0	Mn	0.0090282	0	0.0112504	0.0343758	0.0306722
Mg	0.00920166	0	0.0120352	0.00967405	0	0	0.0146004	0.0117293	0	0.0138583	Mg	0	0	0.00929556	0.0112745	0	0.0106759	0	0.0148225	0	0.00456292	Mg	0	0	0.012881	0.0146444	0.0134125	0.0120629	0.0121442	0.0137889	0.0149774	0.00940845	Mg	0.0109581	2.31675	0.0110174	0	0.00915754	0	0.0590625	0	0.0209891	0	Mg	0.0129964	0	0	0.00979228	0.00215288
Ca	5.72923	5.50848	5.73789	5.73123	5.66449	5.50898	5.91856	5.88625	5.88769	5.88659	Ca	5.75841	5.82135	5.80011	5.78976	5.45259	5.87861	5.94809	5.87392	5.8805	5.95213	Ca	5.88518	5.89049	5.8386	5.8541	5.84699	5.84648	5.83254	5.84421	5.84035	5.83963	Ca	5.85475	3.41558	5.83003	5.82938	5.83251	5.8402	5.57496	5.55522	5.74196	5.94301	Ca	5.87117	5.92862	5.86714	5.8781	5.88631
Na	0.00171022	0.00342246	0.00347957	0.00347957	0.00347957	0.00347957	0.00347957	0.00347957	0	0.001803	Na	0.00184167	0	0.00172768	0.00183355	0.00726804	0.0034724	0.00181999	0.00350625	0.00179536	0.00197882	Na	0	0	0.00744821	0.00381055	0.00193888	0.00174378	0	0	0	0.00524598	Na	0.00356418	0.00486414	0	0.00365382	0.00340405	0.00175115	0.00365913	0	0	0	Na	0	0	0.00301789	0.00074941	0.00018673
K	0	0.00112596	0.00114475	0	0	0.0154579	0.00113624	0	0	0.00118634	K	0	0	0	0	0	0	0	0	0	0	K	0	0	0	0	0.00127575	0	0.00115512	0	0.00116558	0	K	0.00117258	0.00426736	0	0	0	0	0.00120382	0.00124283	0	0.00121416	K	0	0	0.00172096	0	0
Ni	0	0.00354924	0	0.00372925	0	0	0.00358165	0	0.000741902	0	Ni	0	0.00146218	0	0.000760588	0	0	0.000754962	0.0029089	0.000744747	0	Ni	0	0	0	0	0	0.0014467	0.00145646	0	0.00367413	0	Ni	0.000739241	0.000672576	0.00148649	0	0.000706029	0	0.00379467	0	0	0	Ni	0	0	0	0.00170978	0
Sr	0.232732	0.458061	0.226869	0.221556	0.284535	0.430948	0.0222084	0.0633892	0.072213	0.0706414	Sr	0.198293	0.130197	0.161733	0.15958	0.0931173	0.0924296	0.0168742	0.0896604	0.0961162	0.024857	Sr	0.114821	0.109509	0.0991297	0.10371	0.113658	0.102743	0.128638	0.106772	0.115499	0.126042	Sr	0.111395	0.0174574	0.140401	0.139332	0.129298	0.126221	0.0169629	0.0338955	0.109673	0.0220756	Sr	0.0528183	0.0713782	0.0921253	0.0532323	0.0508772
Ba	0.00484191	0.00484191	0.00484191	0.00484191	0.00484191	0.00484191	0	0.0041122	0	0.000728796	Ba	0	0	0	0	0	0	0	0.00425181	0.00253998	0.00199966	Ba	0	0	0	0	0	0	0.00496729	0.00145029	0.0017901	0.00070683	Ba	0.0025212	0	0.00217274	0.00217274	0.00217274	0.00217274	0.00217274	0.00217274	0	0.000372941	Ba	0	0	0	0	0
Ce	0	0	0	0	0	0	0	0	0	0.00170215	Ce	0.00243411	0.00166385	0.00130483	0.00207718	0	0.000983447	0.000343636	0.00165506	0	0.000373626	Ce	0	0	0	0	0.00256259	0.00197549	0	0	0	0	Ce	0	0	0	0	0	0	0	0	0	0	Ce	0	0	0	0	0
Rock type: 5: Los Frailes Ijolites-Urtites; 6: Perovskite-bearing ijolites s. l. (Barranco del Agua Salada); 11: Biotitic Malignites (Playa del Aguila).											Rock type: 11: Biotitic Malignites (Playa del Aguila); 13: Feldespatic ijolites (Montaña de la Morriña); 15: Pegmatite ijolite (Las Montañetas).											Rock type: 15: Pegmatite ijolite (Las Montañetas); 16: Nepheline syenite (Las Montañetas)..											Rock type: 16: Nepheline syenite (Las Montañetas); 17: calcitebonatites and Silico-calcitebonatites (Las Montañetas).											Rock type: 17: calcitebonatites and Silico-calcitebonatites (Las Montañetas); 20: Late nepheline syenite network (Barranco del Agua Salada).
< indicate below the detection limit.Nd: not determined.											< indicate below the detection limit.Nd: not determined.											< indicate below the detection limit.Nd: not determined.											< indicate below the detection limit.Nd: not determined.											< indicate below the detection limit.Nd: not determined.
[truncated: 4 more columns]

## Sheet: Supplementary Material Table 9
Supplementary Material Table 9a: Representative analyses (in wt) and formulae of apatites from Esquinzo ultralkaline rocks											Supplementary Material Table 9a: Representative analyses (in wt) and formulae of apatites from Esquinzo ultralkaline rocks											Supplementary Material Table 9a: Representative analyses (in wt) and formulae of apatites from Esquinzo ultralkaline rocks											Supplementary Material Table 9a: Representative analyses (in wt) and formulae of apatites from Esquinzo ultralkaline rocks											Supplementary Material Table 9a: Representative analyses (in wt) and formulae of apatites from Esquinzo ultralkaline rocks
Sample-Point	E17-01-40	E17-01-48	E8-01-193	E8-01-209	E8-01-212	E14-01-165	E14-01-170	E14-01-179	E-31-01-46	E-31-01-47	Sample-Point	E-31-01-64	E-31-01-65	E-31-01-71	E-31-01-72	E-31-01-89	E-31-01-91	E-31-01-97	E42-01-148	E-42-01-157	E-42-01-163	Sample-Point	E-42-01-181	E-42-01-185	8438-1A-2	8438-1B-17	8438-2A-27	7723-145	7723-152	7723-153	E67-01-1C-100	E-57-01-108	Sample-Point	E-57-01-132	E-57-01-142	E56-01-80	E56-01-81	E-29-01-12	E-29-01-32	E36-01-15	E36-01-23	E36-01-31	E36-01-39	Sample-Point	E36-01-42	E36-01-49	E36-01-6	E36-01-7	E13-01-104
Rock Type	2	2	2	2	2	3	3	3	6	6	Rock Type	6	6	6	6	6	6	6	8	8	8	Rock Type	8	8	11	11	11	15	15	15	15	15	Rock Type	15	15	17	17	18	18	22	22	22	22	Rock Type	22	22	22	22	23
Plutonic Group	1	1	1	1	1	1	1	1	1	1	Plutonic Group	1	1	1	1	1	1	1	1	1	1	Plutonic Group	1	1	1	1	1	1	1	1	1	1	Plutonic Group	1	1	1	1	2	2	2	3	3	3	Plutonic Group	3	3	3	3	3
Observations	Pl Esquinzo	Pl Esquinzo	Pl Esquinzo	Pl Esquinzo	Pl Esquinzo	Pl Esquinzo	Pl Esquinzo	Pl Esquinzo	Agua Salada	Agua Salada	Observations	Agua Salada	Agua Salada	Agua Salada	Agua Salada	Agua Salada	Agua Salada	Agua Salada	Bco Esquinzo	Bco Esquinzo	Bco Esquinzo	Observations	Bco Esquinzo	Bco Esquinzo	Pl Aguila	Pl Aguila	Pl Aguila	Montañetas	Montañetas	Montañetas	Montañetas	Montañetas	Observations	Montañetas	Montañetas	Montañetas	Montañetas	Agua Salada	Agua Salada	Agua Salada	Agua Salada	Agua Salada	Agua Salada	Observations	Agua Salada	Agua Salada	Agua Salada	Agua Salada	Pl Esquinzo
Color											Color											Color											Color											Color
SiO2	<	<	<	<	<	<	<	<	<	<	SiO2	<	<	<	<	<	<	<	<	<	<	SiO2	<	<	0.07	0.38	0.12	<	<	<	0.48	<	SiO2	<	<	<	<	<	<	<	<	<	<	SiO2	<	<	<	<	<
FeOT	<	<	<	<	<	<	<	<	<	<	FeOT	<	<	<	<	<	<	<	<	<	<	FeOT	<	<	<	0.1	<	<	<	<	<	<	FeOT	<	<	<	<	<	<	<	<	<	<	FeOT	<	<	<	<	<
MnO	<	<	<	<	<	<	<	<	<	<	MnO	<	<	<	<	<	<	<	<	<	<	MnO	<	<	<	<	<	<	<	<	<	<	MnO	<	<	<	<	<	<	<	<	<	<	MnO	<	<	<	<	<
MgO	<	<	<	<	<	<	<	<	<	<	MgO	<	<	<	<	<	<	<	<	<	<	MgO	<	<	<	0.04	0.04	<	<	<	<	<	MgO	<	<	<	<	<	<	<	<	<	<	MgO	<	<	<	<	<
SrO	1.36	1.17	3.75	1.49	0.98	1	1.19	0.96	0.44	0.8	SrO	0.84	0.75	0.84	0.68	0.63	0.53	0.47	0.78	2.86	2.26	SrO	3.06	1.13	1.63	2.16	1.64	1.36	0.93	1.32	0.9	1.32	SrO	0.55	0.38	1.03	0.93	5.84	5.76	0.28	0.39	0.67	0.37	SrO	0.34	0.36	0.5	0.61	3.92
CaO	55.48	55.63	53.88	55.68	55.91	54.09	54.71	54.32	53.29	53.12	CaO	52.98	53.19	52.69	53.52	54.41	54.29	54.6	54.65	53.8	53.98	CaO	52.53	54.19	54.2	53.13	54.1	53.97	54.32	53.7	54.32	53.23	CaO	55.09	54.32	55.54	55.87	48.54	48.07	53.13	55.14	53.84	52.41	CaO	52.66	52.99	52.59	52.55	53.08
Na2O	<	<	<	<	<	<	<	<	<	<	Na2O	<	<	<	<	<	<	<	<	<	<	Na2O	<	<	<	0.06	<	<	<	<	<	<	Na2O	<	<	<	<	<	<	<	<	<	<	Na2O	<	<	<	<	<
K2O	<	<	<	<	<	<	<	<	<	<	K2O	<	<	<	<	<	<	<	<	<	<	K2O	<	<	<	<	<	<	<	<	<	<	K2O	<	<	<	<	<	<	<	<	<	<	K2O	<	<	<	<	<
P2O5	42.35	42.69	42.87	42.31	42.22	42.4	42.7	41.81	42.76	42.56	P2O5	42.29	43.1	42.57	42.42	40.82	42.4	43.08	42.2	42.98	42.6	P2O5	41.67	42.53	42.8	41.97	42.74	42.49	41.87	42.78	42.19	43.34	P2O5	42.77	42.44	42.64	42.6	42.71	42.64	40.3	40.87	42.18	40.57	P2O5	41	40.82	41.21	41.28	40.46
F	1.86	2.01	1.92	2.78	2.11	2.31	1.87	1.81	1.48	1.35	F	1.95	1.49	2.22	1.26	1.28	1.3	1.56	2.77	1.99	1.95	F	1.99	2.01	3.19	3	3.17	1.99	2.53	2.43	3.13	1.57	F	1.22	1.52	2.65	3.23	1.78	2.25	1.57	1.89	1.16	1.82	F	1.58	1.76	1.57	1.21	2.71
Cl	<	<	<	<	<	<	<	<	<	<	Cl	<	<	<	<	<	<	<	<	<	<	Cl	<	<	<	<	<	<	<	<	<	<	Cl	<	<	<	<	<	<	<	<	<	<	Cl	<	<	<	<	<
Total	101.05	101.5	102.42	102.26	101.22	99.8	100.47	98.9	97.97	97.83	Total	98.06	98.53	98.32	97.88	97.14	98.52	99.71	100.4	101.63	100.79	Total	99.25	99.86	101.98	100.88	101.92	99.81	99.65	100.23	101.14	99.46	Total	99.63	98.66	101.86	102.63	98.87	98.72	95.28	98.29	97.85	95.17	Total	95.58	95.93	95.87	95.65	100.17
O_F_Cl	0.78	0.85	0.81	1.17	0.89	0.97	0.79	0.76	0.62	0.57	O_F_Cl	0.82	0.63	0.93	0.53	0.54	0.55	0.66	1.17	0.84	0.82	O_F_Cl	0.84	0.85	1.34	1.26	1.33	0.84	1.07	1.02	1.32	0.66	O_F_Cl	0.51	0.64	1.12	1.36	0.75	0.95	0.66	0.8	0.49	0.77	O_F_Cl	0.67	0.74	0.66	0.51	1.14
Total	100.27	100.65	101.61	101.09	100.33	98.83	99.68	98.14	97.35	97.26	Total	97.24	97.9	97.39	97.35	96.6	97.97	99.05	99.23	100.79	99.97	Total	98.41	99.01	100.64	99.62	100.59	98.97	98.58	99.21	99.82	98.8	Total	99.12	98.02	100.74	101.27	98.12	97.77	94.62	97.49	97.36	94.4	Total	94.91	95.19	95.21	95.14	99.03
Structural formulae on the basis of 12 O											Structural formulae on the basis of 12 O											Structural formulae on the basis of 12 O											Structural formulae on the basis of 12 O											Structural formulae on the basis of 12 O
Si	0	0	0	0	0	0	0	0	0	0	Si	0	0	0	0	0	0	0	0	0	0	Si	0	0	0.006	0.031	0.01	0	0	0	0.039	0	Si	0	0	0	0	0	0	0	0	0	0	Si	0	0	0	0	0
Fe2+	0	0	0	0	0	0	0	0	0	0	Fe2+	0	0	0	0	0	0	0	0	0	0	Fe2+	0	0	0.002	0.007	0	0	0	0	0.004	0	Fe2+	0	0	0	0	0	0	0	0	0	0	Fe2+	0	0	0	0	0
Mn	0	0	0	0	0	0	0	0	0	0	Mn	0	0	0	0	0	0	0	0	0	0	Mn	0	0	0.001	0.003	0.001	0	0	0	0.001	0	Mn	0	0	0	0	0	0	0	0	0	0	Mn	0	0	0	0	0
Mg	0	0	0	0	0	0	0	0	0	0	Mg	0	0	0	0	0	0	0	0	0	0	Mg	0	0	0.002	0.005	0.005	0	0	0	0.004	0	Mg	0	0	0	0	0	0	0	0	0	0	Mg	0	0	0	0	0
Sr	0.063	0.054	0.173	0.069	0.046	0.047	0.055	0.045	0.021	0.038	Sr	0.04	0.035	0.04	0.032	0.03	0.025	0.022	0.037	0.132	0.105	Sr	0.146	0.053	0.076	0.102	0.076	0.064	0.044	0.062	0.042	0.061	Sr	0.026	0.018	0.048	0.043	0.279	0.276	0.014	0.019	0.032	0.018	Sr	0.016	0.017	0.024	0.029	0.188
Ca	4.76	4.748	4.599	4.77	4.798	4.69	4.699	4.743	4.634	4.632	Ca	4.641	4.601	4.607	4.664	4.823	4.709	4.681	4.737	4.603	4.648	Ca	4.618	4.684	4.651	4.615	4.644	4.671	4.739	4.638	4.684	4.577	Ca	4.726	4.711	4.749	4.771	4.281	4.26	4.798	4.862	4.698	4.737	Ca	4.722	4.752	4.7	4.691	4.714
Na	0	0	0	0	0	0	0	0	0	0	Na	0	0	0	0	0	0	0	0	0	0	Na	0	0	0.003	0.009	0.003	0	0	0	0.002	0	Na	0	0	0	0	0	0	0	0	0	0	Na	0	0	0	0	0
K	0	0	0	0	0	0	0	0	0	0	K	0	0	0	0	0	0	0	0	0	0	K	0	0	0.001	0	0	0	0	0	0	0	K	0	0	0	0	0	0	0	0	0	0	K	0	0	0	0	0
P	2.871	2.879	2.891	2.864	2.863	2.905	2.898	2.885	2.938	2.932	P	2.928	2.946	2.941	2.921	2.859	2.906	2.919	2.891	2.906	2.899	P	2.895	2.905	2.902	2.881	2.899	2.906	2.887	2.92	2.875	2.945	P	2.899	2.908	2.881	2.874	2.976	2.986	2.876	2.848	2.908	2.898	P	2.905	2.892	2.91	2.912	2.839
Cations	7.694	7.681	7.663	7.703	7.707	7.642	7.652	7.673	7.593	7.602	Cations	7.609	7.582	7.588	7.617	7.712	7.64	7.622	7.665	7.641	7.652	Cations	7.659	7.642	7.644	7.653	7.638	7.641	7.67	7.62	7.651	7.583	Cations	7.651	7.637	7.678	7.688	7.536	7.522	7.688	7.729	7.638	7.653	Cations	7.643	7.661	7.634	7.632	7.741
F	0.942	1.013	0.967	1.406	1.069	1.182	0.948	0.933	0.76	0.695	F	1.008	0.761	1.146	0.648	0.67	0.666	0.79	1.417	1.005	0.991	F	1.033	1.026	1.616	1.538	1.606	1.017	1.303	1.239	1.593	0.797	F	0.618	0.778	1.338	1.628	0.927	1.177	0.837	0.984	0.597	0.971	F	0.836	0.932	0.828	0.638	1.421
Cl	0	0	0	0	0	0	0	0	0	0	Cl	0	0	0	0	0	0	0	0	0	0	Cl	0	0	0	0	0	0	0	0	0	0	Cl	0	0	0	0	0	0	0	0	0	0	Cl	0	0	0	0	0
Rock type: 2: Perovskite-bearing pyroxenites (Playa de Esquinzo); 3: Playa de Esquinzo Melteigites; 6: Perovskite-bearing ijolites s. l. (Barranco del Agua Salada).											Rock type: 6: Perovskite-bearing ijolites s. l. (Barranco del Agua Salada); 8: Xenolite in ijolite (Barranco de Esquinzo) .											Rock type: 8: Xenolite in ijolite (Barranco de Esquinzo); 11: Biotitic Malignites (Playa del Aguila); 15: Pegmatite ijolite (Las Montañetas).											Rock type: 15: Pegmatite ijolite (Las Montañetas); 17: Carbonatites and Silico-carbonatites (Las Montañetas); 18: Feldesphatic ijolites (Barranco del Agua Salada); 22: Nephelinites (Barranco del Agua Salada).											Rock type: 22: Nephelinites (Barranco del Agua Salada); 23: Phonolitic nephelinites.
< indicate below the detection limit.Nd: not determined.											< indicate below the detection limit.Nd: not determined.											< indicate below the detection limit.Nd: not determined.											< indicate below the detection limit.Nd: not determined.											< indicate below the detection limit.Nd: not determined.
[truncated: 2 more columns]

## Sheet: Supplementary Mater. Table 10a
Supplementary Material Table 10a: Representative analyses (in wt.) and formulae of ilmenites from Esquinzo ultralkaline rocks
Sample-Point	7720-30	7720-31	OL-32-10	E33-01-130
Rock Type	1	1	17	20
Plutonic Group	1	1	1	2
Observations
Mineral
SiO2	<	<	1.73	1.34
TiO2	53.47	53.35	63.1	63.33
Al2O3	<	0.13	0.37	0.32
FeOT	40.87	40.78	19.44	29.31
Cr2O3	<	<	<	<
MnO	1.83	1.62	1.56	7.39
MgO	5.1	4.57	0.13	0.14
CaO	<	0.34	0.42	0.32
Na2O	0.04	<	0.04	0.18
K2O	<	<	<	<
Total	101.31	100.79	86.79	102.33
Structural formulae on the basis of 6 O
Si	0.000477664	0	0.088474	0.0618396
Ti	1.92083	1.93394	2.42691	2.198
Al	0.00281538	0.00738655	0.0223057	0.0174083
Fe2+	1.47475	1.51635	0.83146	1.13124
Fe3+	0.157905	0.12753	0	0
Cr	0.000377581	0	0.00121277	0
Mn	0.0740431	0.0661424	0.067578	0.28888
Mg	0.363056	0.328286	0.00990819	0.00962879
Ca	0.00204728	0.0175601	0.0230151	0.0158236
Na	0.00370466	0.00280377	0.0039664	0.0161065
K	0	0	0	0.00117753
Fe3+A	0.157937	0.127556	-1.8136	-0.833881
Fe2+A	1.47473	1.51634	2.77072	2.04373
Fe3+	0.157937	0.127556	0	0
Fe2+	1.47473	1.51634	2.77072	2.04373
Rock type: 1: Perovskite-bearing amphibole Pyroxenite (Las Montañetas); 17: Carbonatites and Silico-carbonatites (Las Montañetas); 22: Nephelinites (Barranco del Agua Salada).
< indicate below the detection limit.Nd: not determined.

## Sheet: Supplementary Mater. Table 10b
Supplementary Material Table 10b: Representative analyses (in wt.) and formulae of magnetites from Esquinzo ultralkaline rocks											Supplementary Material Table 10c: Representative analyses (in wt.) and formulae of magnetites from Esquinzo ultralkaline rocks											Supplementary Material Table 10d: Representative analyses (in wt.) and formulae of magnetites from Esquinzo ultralkaline rocks											Supplementary Material Table 10e: Representative analyses (in wt.) and formulae of magnetites from Esquinzo ultralkaline rocks											Supplementary Material Table 10f: Representative analyses (in wt.) and formulae of magnetites from Esquinzo ultralkaline rocks
Sample-Point	7720-17	7720-18	7720-19	7720-5	7720-6	E70-01-125	E70-01-129	E70-01-137	E70-01-140	E17-01-41	Sample-Point	E17-01-49	E18-01-180	E18-01-189	E18-01-190	E18-01-191	E18-01-198	E18-01-200	E18-01-210	E18-01-211	E19-01-152	Sample-Point	E19-01-159	E19-01-165	E19-01-167	E19-01-172	E19-01-175	E14-01-166	E14-01-177	8419-2B-59	E31-01-41	E31-01-42	Sample-Point	E31-01-57	E31-01-61*	E31-01-74	E31-01-75	E31-01-76	E31-01-81	E31-01-82	E31-01-86	E31-01-93	E31-01-98	Sample-Point	8449-1A-77	E8-01-194	E8-01-201	E8-01-3	E8-01-9
Rock Type	1	1	1	1	1	1	1	1	1	2	Rock Type	2	2	2	2	2	2	2	2	2	2	Rock Type	2	2	2	2	2	3	3	3	6	6	Rock Type	6	6	6	6	6	6	6	6	6	6	Rock Type	7	7	7	7	7
Plutonic Group	1	1	1	1	1	1	1	1	1	1	Plutonic Group	1	1	1	1	1	1	1	1	1	1	Plutonic Group	1	1	1	1	1	1	1	1	1	1	Plutonic Group	1	1	1	1	1	1	1	1	1	1	Plutonic Group	1	1	1	1	1
Observations	Montañetas	Montañetas	Montañetas	Montañetas	Montañetas	Montañetas	Montañetas	Montañetas	Montañetas	Pl Esquinzo	Observations	Pl Esquinzo	Pl Esquinzo	Pl Esquinzo	Pl Esquinzo	Pl Esquinzo	Pl Esquinzo	Pl Esquinzo	Pl Esquinzo	Pl Esquinzo	Pl Esquinzo	Observations	Pl Esquinzo	Pl Esquinzo	Pl Esquinzo	Pl Esquinzo	Pl Esquinzo	Pl Esquinzo	Pl Esquinzo	Pl Tebeto	Agua Salada	Agua Salada	Observations	Agua Salada	Agua Salada	Agua Salada	Agua Salada	Agua Salada	Agua Salada	Agua Salada	Agua Salada	Agua Salada	Agua Salada	Observations	Pl Esquinzo	Pl Esquinzo	Pl Esquinzo	Pl Esquinzo	Pl Esquinzo
Mineral											Mineral											Mineral											Mineral											Mineral
SiO2	<	0 ,36	<	<	1 ,89	0 ,14	<	0 ,2	<	0 ,06	SiO2	<	1 ,02	<	2 ,1	0 ,08	0 ,06	0 ,1	0 ,06	0 ,07	0 ,57	SiO2	1 ,33	<	0 ,11	<	0 ,07	<	<	0 ,1	<	0 ,08	SiO2	<	<	<	1 ,46	0 ,11	0 ,87	0 ,06	<	0 ,07	0 ,1	SiO2	0 ,1	0 ,07	<	0 ,06	0 ,09
TiO2	3 ,42	11 ,99	12 ,35	12 ,09	12 ,26	0 ,07	11 ,05	8 ,72	9 ,87	12 ,63	TiO2	8 ,41	11 ,7	6 ,83	24 ,7	5 ,36	9 ,17	6 ,6	6 ,62	5 ,94	13 ,21	TiO2	12 ,58	8 ,72	11 ,95	9 ,41	9 ,49	8 ,09	<	<	13	15 ,63	TiO2	13 ,02	7 ,94	14 ,1	10 ,49	10 ,49	8 ,93	21 ,76	11 ,99	7 ,9	5 ,71	TiO2	1 ,78	1 ,79	5 ,17	8 ,96	11 ,68
Al2O3	1 ,5	0 ,94	0 ,79	0 ,96	0 ,56	0 ,3	0 ,84	0 ,86	0 ,88	1 ,42	Al2O3	1 ,7	1 ,49	2 ,14	1 ,23	1 ,65	2 ,17	1 ,63	1 ,78	1 ,52	0 ,89	Al2O3	1 ,52	1 ,71	1 ,75	1 ,87	1 ,94	1 ,46	1 ,65	<	1 ,91	1 ,72	Al2O3	1 ,94	2 ,07	1 ,95	1 ,65	1 ,65	1 ,63	1 ,5	3 ,13	0 ,88	0 ,78	Al2O3	0 ,18	0 ,25	0 ,27	0 ,77	0 ,47
FeO	29 ,52	37 ,83	38 ,93	38 ,15	42 ,47	30 ,29	37 ,44	36 ,31	37 ,34	38 ,86	FeO	35 ,6	41 ,13	34 ,21	52 ,45	33 ,34	34 ,95	33 ,9	33 ,65	32 ,59	41 ,63	FeO	41 ,86	34 ,92	36 ,92	36 ,01	35 ,29	34 ,4	34 ,86	21 ,73	35 ,36	40 ,9	FeO	40 ,44	37 ,28	41 ,52	40 ,32	38 ,17	30 ,54	37 ,98	40 ,56	35 ,1	35 ,7	FeO	31 ,91	31 ,75	34 ,95	36 ,38	38 ,14
Fe2O3	61 ,77	43 ,67	44 ,7	45 ,32	36 ,71	65 ,95	47 ,04	50 ,67	50 ,1	43 ,05	Fe2O3	51 ,81	39 ,26	53 ,51	9 ,97	56 ,82	49 ,85	55 ,29	53 ,27	52 ,93	36 ,87	Fe2O3	34 ,94	48 ,6	40 ,59	49 ,14	46 ,57	49 ,88	48 ,37	47 ,83	42 ,97	38 ,4	Fe2O3	41 ,16	51 ,78	38 ,8	44 ,58	46 ,97	38 ,39	26 ,63	39 ,93	53 ,4	58 ,06	Fe2O3	64 ,28	64 ,22	56 ,61	50 ,47	44 ,2
Cr2O3	<	<	<	<	<	<	<	<	<	<	Cr2O3	<	<	<	<	<	<	<	<	<	0 ,16	Cr2O3	<	<	<	<	<	<	<	<	<	<	Cr2O3	<	<	<	<	<	<	<	<	<	<	Cr2O3	<	<	<	<	0 ,12
MnO	0 ,81	0 ,91	0 ,91	0 ,8	0 ,47	<	0 ,87	0 ,88	0 ,79	1 ,18	MnO	1 ,06	0 ,23	0 ,9	1 ,03	0 ,71	1 ,42	1 ,11	1 ,24	0 ,98	0 ,29	MnO	0 ,16	1 ,04	1 ,07	0 ,98	0 ,98	1 ,28	1 ,39	0	1 ,15	1 ,27	MnO	1 ,25	1 ,02	1 ,56	0 ,98	0 ,98	0 ,75	2 ,19	0 ,56	0 ,49	0 ,34	MnO	0 ,48	0 ,56	1 ,04	1 ,15	2 ,37
MgO	2 ,64	2 ,11	1 ,75	2 ,21	0 ,2	<	1 ,88	0 ,94	1 ,62	1 ,77	MgO	1 ,7	0 ,46	1 ,58	1 ,03	1 ,38	2 ,38	1 ,73	1 ,29	1 ,19	0 ,23	MgO	0 ,32	1 ,58	1 ,79	1 ,95	1 ,82	1 ,37	1 ,99	<	4 ,27	3 ,06	MgO	0 ,9	0 ,36	0 ,65	1 ,27	1 ,27	2 ,85	6 ,8	0 ,35	1 ,9	0 ,61	MgO	<	<	<	1 ,11	0 ,51
CaO	<	0 ,17	<	<	0 ,14	<	<	0 ,07	<	<	CaO	<	<	<	0 ,26	<	<	<	0 ,08	<	0 ,06	CaO	<	<	<	<	<	<	<	<	<	<	CaO	<	0 ,1	<	<	<	0 ,14	<	0 ,08	<	<	CaO	<	0 ,13	<	<	<
Na2O	<	0 ,17	<	<	0 ,05	<	0 ,04	<	<	0 ,05	Na2O	<	<	0 ,04	0 ,05	<	<	<	<	<	<	Na2O	<	<	<	<	<	0 ,04	<	0 ,16	<	0 ,05	Na2O	<	<	0 ,09	<	<	0 ,13	<	0 ,35	<	<	Na2O	<	<	<	<	0 ,05
K2O	<	<	<	<	0 ,07	<	<	<	<	<	K2O	<	0 ,04	<	0 ,14	<	<	<	0 ,03	<	<	K2O	0 ,08	<	<	<	<	<	<	<	0 ,03	<	K2O	0 ,04	<	<	<	<	0 ,03	<	<	<	0.03	K2O	<	0 ,04	<	<	<
Total	99 ,61	98 ,15	99 ,43	99 ,73	94 ,82	96 ,75	99 ,16	98 ,63	100 ,60	99 ,11	Total	100 ,28	95 ,33	99 ,21	92.96	99 ,34	100 ,00	100 ,36	98 ,02	95 ,22	93 ,91	Total	92 ,79	96 ,60	94 ,18	99 ,36	96 ,16	96 ,52	88 ,25	69 ,81	98 ,69	101 ,11	Total	98 ,75	100 ,54	98 ,67	100 ,75	99 ,64	84 ,26	96 ,92	96.95	99 ,74	101 ,33	Total	98 ,73	98 ,81	98 ,04	98 ,90	97 ,63
Structural formulae on the basis of 4 O											Structural formulae on the basis of 4 O											Structural formulae on the basis of 4 O											Structural formulae on the basis of 4 O											Structural formulae on the basis of 4 O
Si	0.001	0.014	0.001	0.002	0.075	0.006	0.001	0.008	0.002	0.002	Si	0.001	0.04	0.002	0.082	0.003	0.002	0.004	0.002	0.003	0.023	Si	0.054	0.001	0.004	0.002	0.003	0.002	0.001	0.005	0.002	0.003	Si	0.001	0.001	0.002	0.054	0.004	0.038	0.002	0.002	0.003	0.004	Si	0.004	0.003	0.001	0.002	0.003
Ti	0.096	0.341	0.349	0.34	0.364	0.002	0.313	0.251	0.277	0.357	Ti	0.236	0.345	0.193	0.729	0.152	0.255	0.185	0.191	0.176	0.398	Ti	0.381	0.253	0.354	0.265	0.276	0.236	0	0	0.36	0.427	Ti	0.37	0.224	0.401	0.291	0.296	0.291	0.599	0.345	0.223	0.161	Ti	0.052	0.052	0.151	0.257	0.34
Al	0.066	0.042	0.035	0.042	0.026	0.014	0.037	0.039	0.039	0.063	Al	0.075	0.069	0.095	0.057	0.073	0.095	0.072	0.08	0.071	0.042	Al	0.072	0.078	0.081	0.082	0.088	0.067	0.081	0.001	0.083	0.073	Al	0.086	0.091	0.087	0.072	0.073	0.083	0.065	0.141	0.039	0.034	Al	0.008	0.011	0.012	0.035	0.021
Fe2+	0.924	1.196	1.224	1.193	1.404	1.006	1.18	1.161	1.163	1.22	Fe2+	1.109	1.349	1.076	1.721	1.054	1.083	1.057	1.077	1.075	1.396	Fe2+	1.408	1.128	1.215	1.127	1.141	1.116	1.221	0.999	1.09	1.241	Fe2+	1.278	1.168	1.313	1.245	1.198	1.107	1.162	1.297	1.102	1.117	Fe2+	1.037	1.031	1.138	1.159	1.235
Fe3+	1.739	1.241	1.263	1.273	1.091	1.969	1.333	1.456	1.403	1.215	Fe3+	1.451	1.157	1.513	0.294	1.614	1.388	1.549	1.532	1.569	1.111	Fe3+	1.057	1.411	1.201	1.383	1.353	1.454	1.523	1.976	1.19	1.047	Fe3+	1.169	1.459	1.103	1.237	1.325	1.251	0.733	1.148	1.507	1.633	Fe3+	1.878	1.875	1.657	1.446	1.287
Cr	0.002	0	0.002	0.001	0	0.002	0	0	0	0.003	Cr	0	0.002	0	0.001	0	0.003	0	0.003	0.002	0.005	Cr	0	0.001	0	0.001	0.001	0	0.003	0	0	0.003	Cr	0	0	0.002	0	0	0	0	0	0.001	0.001	Cr	0.001	0.002	0	0.001	0.004
Mn	0.026	0.029	0.029	0.025	0.016	0.002	0.028	0.028	0.025	0.038	Mn	0.033	0.008	0.029	0.034	0.023	0.045	0.035	0.04	0.033	0.01	Mn	0.005	0.034	0.036	0.031	0.032	0.042	0.049	0	0.036	0.039	Mn	0.04	0.032	0.05	0.031	0.031	0.028	0.068	0.018	0.016	0.011	Mn	0.016	0.018	0.034	0.037	0.078
Mg	0.147	0.119	0.098	0.123	0.012	0	0.106	0.054	0.09	0.099	Mg	0.094	0.027	0.089	0.06	0.078	0.131	0.096	0.074	0.07	0.014	Mg	0.019	0.091	0.105	0.109	0.105	0.079	0.124	0.001	0.235	0.165	Mg	0.051	0.02	0.037	0.07	0.071	0.184	0.371	0.02	0.106	0.034	Mg	0.002	0	0.001	0.063	0.029
Ca	0.001	0.007	0	0.001	0.006	0.001	0	0.003	0	0.002	Ca	0.001	0.002	0.001	0.011	0.001	0	0	0.003	0.002	0.003	Ca	0	0.001	0.002	0	0.001	0	0	0.001	0.001	0	Ca	0.002	0.004	0.002	0	0	0.007	0	0.003	0.002	0.002	Ca	0.002	0.005	0.001	0	0.002
Na	0	0.012	0	0	0.004	0	0.003	0	0.001	0.004	Na	0	0.002	0.003	0.004	0	0.001	0.001	0	0.002	0.002	Na	0	0.002	0.001	0	0	0.003	0	0.017	0.001	0.004	Na	0.001	0.001	0.007	0.001	0.001	0.011	0	0.026	0.002	0.002	Na	0.001	0.001	0.002	0	0.004
K	0	0	0	0	0.004	0.001	0	0	0	0	K	0	0.002	0.001	0.007	0.001	0	0	0.001	0	0.001	K	0.004	0	0.001	0	0	0.001	0	0.001	0.001	0	K	0.002	0	0	0	0	0.002	0.001	0	0	0.001	K	0	0.002	0	0	0
Cations	3.002	3.001	3.001	3	3.002	3.003	3.001	3	3	3.003	Cations	3	3.003	3.002	3	2.999	3.003	2.999	3.003	3.003	3.005	Cations	3	3	3	3	3	3	3.002	3.001	2.999	3.002	Cations	3	3	3.004	3.001	2.999	3.002	3.001	3	3.001	3	Cations	3.001	3	2.997	3	3.003
Rock type: 1: Perovskite-bearing amphibole Pyroxenite (Las Montañetas).											Rock type: 2: Perovskite-bearing pyroxenites (Playa de Esquinzo).											Rock type: 2: Perovskite-bearing pyroxenites (Playa de Esquinzo); 3: Playa de Esquinzo Melteigites; 6: Perovskite-bearing ijolites s. l. (Barranco del Agua Salada).											Rock type: 6: Perovskite-bearing ijolites s. l. (Barranco del Agua Salada).											Rock type: 7: Ijolitic breccia (Playa de Esquinzo); 8: Xenolite in ijolite (Barranco de Esquinzo); 11: Biotitic Malignites (Playa del Aguila).
< indicate below the detection limit.Nd: not determined.											< indicate below the detection limit.Nd: not determined.											< indicate below the detection limit.Nd: not determined.											< indicate below the detection limit.Nd: not determined.											< indicate below the detection limit.Nd: not determined.
[truncated: 30 more columns]

## Sheet: Supplementary Material Table 11
Supplementary Material Table 11: Representative analyses (in wt.) and formulae of perovskites from Esquinzo											Supplementary Material Table 11: Representative analyses (in wt.) and formulae of perovskites from Esquinzo											Supplementary Material Table 11: Representative analyses (in wt.) and formulae of perovskites from Esquinzo											Supplementary Material Table 11: Representative analyses (in wt.) and formulae of perovskites from Esquinzo
ultralkaline rocks.											ultralkaline rocks.											ultralkaline rocks.											ultralkaline rocks.
Sample-Point	E70-01-127	E70-01-128	E70-01-133n	E70-01-134b	E70-01-135	E70-01-143	E14-01-159	E14-01-160	E14-01-161	E14-01-168	Sample-Point	E14-01-175	E31-01-48	E31-01-49	E31-01-51	E31-01-54	E31-01-55	E31-01-58	E31-01-59	E31-01-73	E31-01-83	Sample-Point	E31-01-84	E31-01-90	E31-01-95	E42-01-146	E42-01-153	E42-01-161	E42-01-192	E42-01-193	E36-01-20	E36-01-21	Sample-Point	E36-01-22	E03-24-3A-14	E03-24-3A-15	E03-24-3A-16	E03-24-3A-17	E03-24-3A-14	E03-24-3A-15	E03-24-3A-16	E03-24-3A-17
Rock Type	1	1	1	1	1	1	2	2	2	2	Rock Type	2	6	6	6	6	6	6	6	6	6	Rock Type	6	6	6	8	8	8	8	8	10	10	Rock Type	10	15	15	15	15	15	15	15	15
Plutonic Group	1	1	1	1	1	1	1	1	1	1	Plutonic Group	1	1	1	1	1	1	1	1	1	1	Plutonic Group	1	1	1	1	1	1	1	1	1	1	Plutonic Group	1	1	1	1	1	1	1	1	1
TiO2	59.82	60.15	60.32	60.88	40.03	62.14	58.96	60.05	59.5	59.94	TiO2	59.1	60.11	60.13	60.59	60.8	60.47	60.23	60	60.27	60.52	TiO2	60.22	60.76	60.36	60.01	61.74	61.01	59.44	59.79	60.04	59.43	TiO2	60.22	55.6	55.72	55.36	55.54	55.59	55.71	55.36	55.54
Al2O3	Nd	Nd	Nd	Nd	Nd	Nd	Nd	Nd	Nd	Nd	Al2O3	Nd	Nd	Nd	Nd	Nd	Nd	Nd	Nd	Nd	Nd	Al2O3	Nd	Nd	Nd	Nd	Nd	Nd	Nd	Nd	Nd	Nd	Al2O3	Nd	0.03	0.04	0.03	0.04	Nd	Nd	Nd	Nd
FeOT	0.837	0.693	0.774	0.603	1.89	0.504	0.837	0.828	0.774	0.63	FeOT	0.81	0.657	0.612	0.594	0.828	0.666	0.549	0.666	0.666	0.576	FeOT	0.594	0.684	0.873	0.63	0.459	0.549	0.9	0.873	0.747	0.9	FeOT	0.792	0.72	0.765	0.909	0.837	0.72	0.765	0.909	0.837
FeOcal	0.837	0.693	0.774	0.603	1.89	0.504	0.837	0.828	0.774	0.63	FeOcal	0.81	0.657	0.612	0.594	0.828	0.666	0.549	0.666	0.666	0.576	FeOcal	0.594	0.684	0.873	0.63	0.459	0.549	0.9	0.873	0.747	0.9	FeOcal	0.792	0	0	0	0	0	0.331521	0	0
Fe2O3cal	0	0	0	0	0	0	0	0	0	0	Fe2O3cal	0	0	0	0	0	0	0	0	0	0	Fe2O3cal	0	0	0	0	0	0	0	0	0	0	Fe2O3cal	0	0.8	0.85	1.01	0.93	0.8	0.481644	1.01	0.93
MnO	Nd	Nd	Nd	Nd	Nd	Nd	Nd	Nd	Nd	Nd	MnO	Nd	Nd	Nd	Nd	Nd	Nd	Nd	Nd	Nd	Nd	MnO	Nd	Nd	Nd	Nd	Nd	Nd	Nd	Nd	Nd	Nd	MnO	Nd	0.02	0.02	0.03	0.03	Nd	Nd	Nd	Nd
MgO	Nd	Nd	Nd	Nd	Nd	Nd	Nd	Nd	Nd	Nd	MgO	Nd	Nd	Nd	Nd	Nd	Nd	Nd	Nd	Nd	Nd	MgO	Nd	Nd	Nd	Nd	Nd	Nd	Nd	Nd	Nd	Nd	MgO	Nd	0.02	0.03	0.03	0.02	Nd	Nd	Nd	Nd
CaO	35.93	36.91	36.93	38.89	25.56	39.26	36.18	36.69	37.18	37.75	CaO	37.19	37.78	37.96	38.27	38.02	37.87	37.35	37.86	37.02	38.38	CaO	37.81	37.76	38.39	36.49	38.37	37.77	37.2	37.03	37.94	38.27	CaO	38.14	37.51	36.25	36.91	36.97	37.51	36.25	36.91	36.97
SrO	Nd	Nd	Nd	Nd	Nd	Nd	Nd	Nd	Nd	Nd	SrO	Nd	Nd	Nd	Nd	Nd	Nd	Nd	Nd	Nd	Nd	SrO	Nd	Nd	Nd	Nd	Nd	Nd	Nd	Nd	Nd	Nd	SrO	Nd	0.38	0.39	0.38	0.39	Nd	Nd	Nd	Nd
Na2O	0.62	0.65	0.62	0.34	0.05	0.23	0.55	0.5	0.48	0.52	Na2O	0.48	0.37	0.39	0.34	0.33	0.37	0.47	0.34	0.48	0.43	Na2O	0.5	0.49	0.43	0.67	0.37	0.54	0.71	0.6	0.39	0.44	Na2O	0.47	0.79	0.86	0.86	0.87	0.79	0.86	0.86	0.87
K2O	Nd	Nd	Nd	Nd	Nd	Nd	Nd	Nd	Nd	Nd	K2O	Nd	Nd	Nd	Nd	Nd	Nd	Nd	Nd	Nd	Nd	K2O	Nd	Nd	Nd	Nd	Nd	Nd	Nd	Nd	Nd	Nd	K2O	Nd	<	0.01	0.01	<	Nd	Nd	Nd	Nd
ZrO2	Nd	Nd	Nd	Nd	Nd	Nd	Nd	Nd	Nd	Nd	ZrO2	Nd	Nd	Nd	Nd	Nd	Nd	Nd	Nd	Nd	Nd	ZrO2	Nd	Nd	Nd	Nd	Nd	Nd	Nd	Nd	Nd	Nd	ZrO2	Nd	0.04	0.04	0.03	0.04	Nd	Nd	Nd	Nd
Nb2O3	0.404616	0.360636	0.13194	0.378228	0.008796	0.035184	0.431004	0.668496	0.413412	0.633312	Nb2O3	0.633312	0.510168	0.457392	0.39582	0.501372	0.457392	0.61572	0.756456	0.57174	0.501372	Nb2O3	0.738864	0.606924	0.431004	0.237492	0.756456	0.510168	0.905988	0.905988	0.606924	0.290268	Nb2O3	0.431004	0.52776	0.61572	0.606924	0.598128	0.52776	0.61572	0.606924	0.905988
Y2O3	Nd	Nd	Nd	Nd	Nd	Nd	Nd	Nd	Nd	Nd	Y2O3	Nd	Nd	Nd	Nd	Nd	Nd	Nd	Nd	Nd	Nd	Y2O3	Nd	Nd	Nd	Nd	Nd	Nd	Nd	Nd	Nd	Nd	Y2O3	Nd	0.06	0.06	0.07	0.05	Nd	Nd	Nd	Nd
La2O3	Nd	Nd	Nd	Nd	Nd	Nd	Nd	Nd	Nd	Nd	La2O3	Nd	Nd	Nd	Nd	Nd	Nd	Nd	Nd	Nd	Nd	La2O3	Nd	Nd	Nd	Nd	Nd	Nd	Nd	Nd	Nd	Nd	La2O3	Nd	0.92	0.97	0.99	1	Nd	Nd	Nd	Nd
Ce2O3	2.7	2.49	2.36	1.06	0.2	0.71	1.91	1.9	2.1	1.89	Ce2O3	1.89	1.02	1.08	0.7	0.84	0.79	1.62	0.87	1.43	1.06	Ce2O3	1.34	1.06	0.83	2.44	0.53	1.53	1.18	1.28	1.39	1.49	Ce2O3	1.29	2.29	2.38	2.44	2.48	2.29	2.38	2.44	2.48
Pr2O3	Nd	Nd	Nd	Nd	Nd	Nd	Nd	Nd	Nd	Nd	Pr2O3	Nd	Nd	Nd	Nd	Nd	Nd	Nd	Nd	Nd	Nd	Pr2O3	Nd	Nd	Nd	Nd	Nd	Nd	Nd	Nd	Nd	Nd	Pr2O3	Nd	0.28	0.28	0.28	0.28	Nd	Nd	Nd	Nd
Sm2O3	Nd	Nd	Nd	Nd	Nd	Nd	Nd	Nd	Nd	Nd	Sm2O3	Nd	Nd	Nd	Nd	Nd	Nd	Nd	Nd	Nd	Nd	Sm2O3	Nd	Nd	Nd	Nd	Nd	Nd	Nd	Nd	Nd	Nd	Sm2O3	Nd	0.12	0.12	0.12	0.13	Nd	Nd	Nd	Nd
Nd2O3	Nd	Nd	Nd	Nd	Nd	Nd	Nd	Nd	Nd	Nd	Nd2O3	Nd	Nd	Nd	Nd	Nd	Nd	Nd	Nd	Nd	Nd	Nd2O3	Nd	Nd	Nd	Nd	Nd	Nd	Nd	Nd	Nd	Nd	Nd2O3	Nd	0.99	0.99	1.03	1.03	Nd	Nd	Nd	Nd
V2O3	Nd	Nd	Nd	Nd	Nd	Nd	Nd	Nd	Nd	Nd	V2O3	Nd	Nd	Nd	Nd	Nd	Nd	Nd	Nd	Nd	Nd	V2O3	Nd	Nd	Nd	Nd	Nd	Nd	Nd	Nd	Nd	Nd	V2O3	Nd	0.19	0.19	0.18	0.19	Nd	Nd	Nd	Nd
Total	101.149	101.947	101.91	102.754	69.6288	103.383	99.705	101.464	101.221	101.993	0	100.913	101.104	101.241	101.484	102.147	101.289	101.384	101.158	101.104	102.043	0	101.797	102.045	102.187	101.107	102.684	102.458	101.236	101.352	101.861	101.72	0	102.135	101.288	100.581	101.276	101.425	98.2278	97.3939	98.0959	98.533
Structural formulae on the basis of 24 O											Structural formulae on the basis of 24 O											Structural formulae on the basis of 24 O											Structural formulae on the basis of 24 O
Ti	8.20633	8.17051	8.18941	8.1427	8.08701	8.2111	8.18207	8.18807	8.14097	8.12449	Ti	8.11741	8.17255	8.16316	8.18226	8.18659	8.19198	8.18041	8.15722	8.20586	8.15062	Ti	8.14927	8.18743	8.13892	8.20188	8.21841	8.19019	8.1245	8.15567	8.13616	8.08852	Ti	8.13552	7.7735	7.84225	7.76969	7.77662	7.89187	7.97582	7.89278	7.88686
Al	Nd	Nd	Nd	Nd	Nd	Nd	Nd	Nd	Nd	Nd	Al	Nd	Nd	Nd	Nd	Nd	Nd	Nd	Nd	Nd	Nd	Al	Nd	Nd	Nd	Nd	Nd	Nd	Nd	Nd	Nd	Nd	Al	Nd	0.00657434	0.00882426	0.0065996	0.00877878	Nd	Nd	Nd	Nd
Fe	0.127687	0.104681	0.116856	0.0896873	0.424604	0.0740595	0.129167	0.125551	0.117766	0.0949598	Fe	0.123719	0.0993337	0.0923929	0.0892029	0.12398	0.100333	0.0829191	0.10069	0.100836	0.0862649	Fe	0.089389	0.102496	0.130904	0.0957526	0.0679444	0.0819568	0.136798	0.132424	0.112569	0.136215	Fe	0.118984	0.111942	0.119732	0.14187	0.130326	0.113667	0.121793	0.144118	0.132173
Fe2+	0.127687	0.104681	0.116856	0.0896873	0.424604	0.0740595	0.129167	0.125551	0.117766	0.0949598	Fe2+	0.123719	0.0993337	0.0923929	0.0892029	0.12398	0.100333	0.0829191	0.10069	0.100836	0.0862649	Fe2+	0.089389	0.102496	0.130904	0.0957526	0.0679444	0.0819568	0.136798	0.132424	0.112569	0.136215	Fe2+	0.118984	0	0	0	0	0	0.0527804	0	0
Fe3+	0	0	0	0	0	0	0	0	0	0	Fe3+	0	0	0	0	0	0	0	0	0	0	Fe3+	0	0	0	0	0	0	0	0	0	0	Fe3+	0	0.111918	0.119706	0.141839	0.130297	0.113643	0.0689978	0.144086	0.132144
Mn	Nd	Nd	Nd	Nd	Nd	Nd	Nd	Nd	Nd	Nd	Mn	Nd	Nd	Nd	Nd	Nd	Nd	Nd	Nd	Nd	Nd	Mn	Nd	Nd	Nd	Nd	Nd	Nd	Nd	Nd	Nd	Nd	Mn	Nd	0.0031494	0.00317041	0.00474225	0.0047311	Nd	Nd	Nd	Nd
Mg	Nd	Nd	Nd	Nd	Nd	Nd	Nd	Nd	Nd	Nd	Mg	Nd	Nd	Nd	Nd	Nd	Nd	Nd	Nd	Nd	Nd	Mg	Nd	Nd	Nd	Nd	Nd	Nd	Nd	Nd	Nd	Nd	Mg	Nd	0.00554113	0.00836714	0.00834363	0.00554934	Nd	Nd	Nd	Nd
Ca	7.02261	7.14326	7.14347	7.41089	7.35702	7.39128	7.15341	7.12779	7.24782	7.29012	Ca	7.27772	7.31833	7.3423	7.36325	7.29375	7.30942	7.22756	7.33348	7.18122	7.36437	Ca	7.28993	7.24938	7.37521	7.10563	7.27699	7.22401	7.24435	7.19654	7.32512	7.42096	Ca	7.34115	7.47184	7.26903	7.38058	7.37519	7.58699	7.39416	7.4975	7.47974
Sr	Nd	Nd	Nd	Nd	Nd	Nd	Nd	Nd	Nd	Nd	Sr	Nd	Nd	Nd	Nd	Nd	Nd	Nd	Nd	Nd	Nd	Sr	Nd	Nd	Nd	Nd	Nd	Nd	Nd	Nd	Nd	Nd	Sr	Nd	0.0409665	0.042325	0.0411239	0.0421069	Nd	Nd	Nd	Nd
Na	0.219283	0.227635	0.217017	0.117242	0.0260426	0.0783555	0.196779	0.175772	0.169321	0.181716	Na	0.169974	0.129695	0.136503	0.118376	0.114558	0.129229	0.164578	0.119174	0.16849	0.149304	Na	0.174445	0.17023	0.149485	0.236089	0.12698	0.186895	0.2502	0.211005	0.136256	0.154393	Na	0.163702	0.284761	0.312061	0.311184	0.314062	0.289149	0.317433	0.316114	0.318514
K	Nd	Nd	Nd	Nd	Nd	Nd	Nd	Nd	Nd	Nd	K	Nd	Nd	Nd	Nd	Nd	Nd	Nd	Nd	Nd	Nd	K	Nd	Nd	Nd	Nd	Nd	Nd	Nd	Nd	Nd	Nd	K	Nd	0	0.00238757	0.00238086	0	Nd	Nd	Nd	Nd
Zr	Nd	Nd	Nd	Nd	Nd	Nd	Nd	Nd	Nd	Nd	Zr	Nd	Nd	Nd	Nd	Nd	Nd	Nd	Nd	Nd	Nd	Zr	Nd	Nd	Nd	Nd	Nd	Nd	Nd	Nd	Nd	Nd	Zr	Nd	0.00362633	0.00365052	0.0027302	0.00363171	Nd	Nd	Nd	Nd
Nb	0.022763	0.0200894	0.00734601	0.0207458	0.000728738	0.0019066	0.0245285	0.037381	0.0231967	0.0352031	Nb	0.0356723	0.0284451	0.0254647	0.0219207	0.0276849	0.0254109	0.0342949	0.0421753	0.0319231	0.0276908	Nb	0.041004	0.0335388	0.0238332	0.0133114	0.0412941	0.028086	0.0507837	0.05068	0.0337284	0.0162011	Nb	0.0238786	0.0302595	0.0355383	0.0349322	0.034345	0.0307258	0.0361501	0.0354856	0.0527599
Y	Nd	Nd	Nd	Nd	Nd	Nd	Nd	Nd	Nd	Nd	Y	Nd	Nd	Nd	Nd	Nd	Nd	Nd	Nd	Nd	Nd	Y	Nd	Nd	Nd	Nd	Nd	Nd	Nd	Nd	Nd	Nd	Y	Nd	0.00593644	0.00597605	0.00695247	0.00495437	Nd	Nd	Nd	Nd
La	Nd	Nd	Nd	Nd	Nd	Nd	Nd	Nd	Nd	Nd	La	Nd	Nd	Nd	Nd	Nd	Nd	Nd	Nd	Nd	Nd	La	Nd	Nd	Nd	Nd	Nd	Nd	Nd	Nd	Nd	Nd	La	Nd	0.0630854	0.0669577	0.0681462	0.0686727	Nd	Nd	Nd	Nd
Ce	0.180305	0.164647	0.155971	0.0690147	0.0196686	0.0456699	0.129027	0.126114	0.139869	0.124705	Ce	0.126367	0.0675077	0.0713728	0.0460164	0.055058	0.0520976	0.107107	0.0575774	0.0947765	0.0694927	Ce	0.0882723	0.0695308	0.05448	0.162339	0.0343431	0.099983	0.0785131	0.0849929	0.0916928	0.0987168	Ce	0.0848353	0.155854	0.16306	0.166701	0.169036	0.158256	0.165867	0.169342	0.171432
Pr	Nd	Nd	Nd	Nd	Nd	Nd	Nd	Nd	Nd	Nd	Pr	Nd	Nd	Nd	Nd	Nd	Nd	Nd	Nd	Nd	Nd	Pr	Nd	Nd	Nd	Nd	Nd	Nd	Nd	Nd	Nd	Nd	Pr	Nd	0.0189672	0.0190937	0.0190401	0.0189953	Nd	Nd	Nd	Nd
Sm	Nd	Nd	Nd	Nd	Nd	Nd	Nd	Nd	Nd	Nd	Sm	Nd	Nd	Nd	Nd	Nd	Nd	Nd	Nd	Nd	Nd	Sm	Nd	Nd	Nd	Nd	Nd	Nd	Nd	Nd	Nd	Nd	Sm	Nd	0.00768854	0.00773983	0.00771808	0.00834159	Nd	Nd	Nd	Nd
Nd	Nd	Nd	Nd	Nd	Nd	Nd	Nd	Nd	Nd	Nd	Nd	Nd	Nd	Nd	Nd	Nd	Nd	Nd	Nd	Nd	Nd	Nd	Nd	Nd	Nd	Nd	Nd	Nd	Nd	Nd	Nd	Nd	Nd	Nd	0.0657346	0.0661732	0.0686534	0.068492	Nd	Nd	Nd	Nd
V	Nd	Nd	Nd	Nd	Nd	Nd	Nd	Nd	Nd	Nd	V	Nd	Nd	Nd	Nd	Nd	Nd	Nd	Nd	Nd	Nd	V	Nd	Nd	Nd	Nd	Nd	Nd	Nd	Nd	Nd	Nd	V	Nd	0.0283187	0.0285076	0.0269314	0.0283607	Nd	Nd	Nd	Nd
Rock type: 1: Perovskite-bearing amphibole Pyroxenite (Las Montañetas); 2: Perovskite-bearing pyroxenites (Playa de Esquinzo).											Rock type: 2: Perovskite-bearing pyroxenites (Playa de Esquinzo); 6: Perovskite-bearing ijolites s. l. (Barranco del Agua Salada).											Rock type: 6: Perovskite-bearing ijolites s. l. (Barranco del Agua Salada); 8: Xenolite in ijolite (Barranco de Esquinzo); 10: ijolitic xenolite in nephelinite.											Rock type: 10: ijolitic xenolite in nephelinite; 15: Pegmatite ijolite (Las Montañetas).
< indicate below the detection limit.Nd: not determined.											< indicate below the detection limit.Nd: not determined.											< indicate below the detection limit.Nd: not determined.											< indicate below the detection limit.Nd: not determined.

## Sheet: Supplementary Material Table 12
Table S12: Representative analyses (in wt.) and formulae of pyrochlores from Esquinzo ultralkaline rocks
ultralkaline rocks.
Sample-Point	ES-C-1C/4	ES-C-1C/5	ES-C-1C/6	OL-35/12	OL-35/13	OL-35/15
Rock Type	17	17	17	17	17	17
Plutonic GroupLocation	1	1	1	1	1	1
Observations	Montañetas	Montañetas	Montañetas
Color	Esquinzo	Esquinzo	Esquinzo	Nao	Nao	Nao
SiO2	0.09	0.49	0.34	<	<	<
TiO2	7.88	6.76	6.29	8.01	7.62	8.64
FeOT	0.636364	0.818182	0.636364	0.390909	0.381818	0.463636
CaO	22.01	20.53	20.85	15.93	16.77	15.98
SrO	0.46	0.47	0.53	0.74	0.98	0.64
Na2O	3.1	3.44	3.67	3.11	2.68	3.32
Nb2O5	61.41	64.3	64.38	55.76	57.93	55.97
Ta2O3	<	<	<	0.473068	0.352482	0.371034
Y2O3	0.05	<	0.08	0.13	0.12	0.17
La2O3	0.45	0.35	0.34	0.56	0.73	0.77
Ce2O3	1.08	0.8	0.8	2.76	3.23	3.64
Pr2O3	0.03	0.06	0.02	0.19	0.26	0.24
Sm2O3	<	<	<	0.14	0.16	0.18
Nd2O3	0.18	0.16	0.13	0.79	0.91	1.06
EuO	Nd	Nd	Nd	Nd	Nd	Nd
Gd2O3	<	<	<	0.18	0.18	0.19
Dy2O3	0.1	0.08	0.1	0.26	0.24	0.27
ThO2	0.31	<	0.12	8.55	5.6	7.34
UO2	0.4	<	<	0.41	1.54	0.29
F	3.41	3.6	3.73	1.6	1.48	1.77
Total1	101.67	101.94	102.08	100.06	101.23	101.38
O_F	1.43561	1.5156	1.57033	0.6736	0.62308	0.74517
Total2	100.24	100.42	100.51	99.39	100.61	100.63
Structural formulae on the basis of Nb+Ta+Ti= 2
Si	0.00533876	0.0286831	0.020094	0.00191246	0.0018735	0.00125345
Ti	0.351544	0.2976	0.279572	0.384025	0.357884	0.407235
Fe	0.0315703	0.0400549	0.0314534	0.0208412	0.0199418	0.0243013
Ca	1.39898	1.2877	1.32035	1.08813	1.12217	1.07312
Sr	0.0158239	0.0159546	0.0181644	0.0273566	0.0354909	0.0232603
Na	0.356555	0.390441	0.420552	0.384413	0.324514	0.403441
Nb	1.647	1.70176	1.72027	1.60713	1.63566	1.58595
Ta	0.00145195	0.000636799	0.000160731	0.00884206	0.00645398	0.00681785
Y	0.00157854	0.00124618	0.00251632	0.00441066	0.00398843	0.0056704
La	0.00984612	0.00755706	0.00741175	0.0131678	0.0168155	0.0178
Ce	0.0234541	0.0171442	0.0173091	0.0644136	0.0738469	0.0835169
Pr	0.000648452	0.0012798	0.000430701	0.00441351	0.00591649	0.00548082
Sm	0.000613331	0.000806987	0.000407374	0.00307592	0.00344372	0.00388798
Nd	Nd	Nd	Nd	Nd	Nd	Nd
Eu	0	0	0	0	0	0
Gd	0.000786572	0	0.00039183	0.00380386	0.00372637	0.00394739
Dy	0.00191108	0.00150869	0.001904	0.0053398	0.00482863	0.00545154
Th	0.004185	0.000666095	0.001614	0.124043	0.0795896	0.104691
U	0.00528076	0	0	0.00581693	0.0214038	0.00404494
F	0.639736	0.666472	0.69718	0.322582	0.292309	0.350831
Rock type: 17: Carbonatites and Silico-carbonatites (Las Montañetas).
< indicate below the detection limit.Nd: not determined.
