# Supplementary material
Source: MDPI journal article supplement (https://www.mdpi.com/2075-163X/14/3/295)
Supplement: s1 [file s1 › Table S13.XLS]

## Sheet: Hoja1
Table S13a. Rock analyses of the studied Fuerteventura rocks.												Table S13b. Rock analyses of the studied Fuerteventura rocks.												Table S13c. Rock analyses of the studied Fuerteventura rocks.												Table S13d. Rock analyses of the studied Fuerteventura rocks.												Table S13e. Rock analyses of the studied Fuerteventura rocks.
Sample	8418 (ED-100)	E-03-23	E-03-27	E-03-9	8420 (ED-102)	8432 (ED-10)	8444 (ED20)	E-03-14	E-03-15	16586*	53896- 53897*	Sample	26364*	7979 (E-76-01)	8438 (ED-14B)	8434 (ED-12)	8436 (ED13B)	7721 97/32	E-03-18	E-03-29	E-03-31	56100*	54005*	Sample	8437 (ED-14A)	E-03-36	E-03-37	E-03-38	E-03-39	56091*	56089*	7963 (E-60-01)	E-03-19	E-03-21	56103*	Sample	53978*	E-03-20	E-03-40	E-03-32	68/SC/72**	68/SC/73**	26276*	53927*	17180*	E-03-10	E-03-11	Sample	E-03-12
Type	Amphibole-bearing pyroxenite of Tebeto	Perovskite-bearing amphibole pyroxenite	Perovskite-bearing amphibole pyroxenite	Perovskite and biotite-bearing melteigite	Amphibole-bearing ijolite of Tebeto	Perovskite and biotite-bearing ijolite	Perovskite and biotite-bearing melteigite	Perovskite -bearing ijolite	Perovskite -bearing ijolite	Ijolite	Ijolite	Type	Ijolite	Melanite-biotite-bearing ijolite-urtite	Feldespatic ijolite-mailignites.	Feldespatic ijolite-mailignites.	Feldespatic ijolite-mailignites.	Melanite-bearing pegmatite ijolite.	Pegmatite ijolite.	Titanite-bearing pegmatite ijolite.	Perovskite-titanite-bearing p. ijolite.	Pegmatite ijolite	Pgmatite ijolite	Type	Nepheline syenite network	Nepheline syenite of Jablitos	Nepheline syenite of Jablitos	Nepheline syenite of Jablitos	Nepheline syenite of Jablitos	Nepheline syenite of Jablitos	Nepheline syenite of Jablitos	Nepheline syenite of syenite-carbonatite composite dykes	Nepheline syenite of syenite-carbonatite composite dykes	Nepheline syenite of syenite-carbonatite composite dykes	Nepheline syenite of syenite-carbonatite composite dykes	Type	Nepheline syenite of syenite-carbonatite composite dykes	Carbonatite	Biotite-bearing carbonatite	Pyroxene-nepheline and feldspar-bearing carbonatite	Carbonatite	Pyroxene-nepheline and feldspar-bearing carbonatite	Pyroxene-bearing carbonatite	Feldspar-bearing carbonatite	Carbonatite	Nephelinite dyke	Nephelinite dyke	Type	Nephelinite dyke
Facies	4	1	1	4	4	4	4	4	4	4	4	Facies	1	3	4	4	4	1	1	1	1	1	1	Facies	4	2	2	2	2	2	2	1	1	1	1	Facies	1	1	1	1	1	1	1	1	1	4	4	Facies	4
SiO2	32.51	17.62	32.21	31.56	34.01	34.64	28.84	32.22	33.96	38	41.65	SiO2	42	42.39	36.14	35.04	38.04	36.79	38.62	36.22	32.59	35.8	44	SiO2	47.25	51.76	54.91	53.41	54.28	53.4	53.95	42.79	35.52	51.4	52.4	SiO2	52.9	12.64	4.7	10.48	0.34	5.85	6.08	7.5	9.7	47.58	42.96	SiO2	42.35
Al2O3	8.86	2.71	3.51	6.41	9.48	9.96	5.18	9.11	8.51	13.12	14.22	Al2O3	13.89	24.26	9.42	10.72	11.39	14.38	14.18	12.3	8.51	9.68	17.89	Al2O3	14.38	20.48	19.55	20.4	19.8	20.9	16.44	14.2	12.57	15.35	20.77	Al2O3	20.37	3.8	1.6	3.29	0.16	3.24	2.72	3.38	4.22	19.41	16.8	Al2O3	15.85
Fe2O3(T)	18.98	23.24	18.34	25.56	15.6	13.28	18.56	16.02	13.76			Fe2O3(T)		5.54	14	12.88	13.6	8.54	5.6	12.56	15.58			Fe2O3(T)	10.48	5.41	4.21	6.03	8.1			5.04	0.52	5.22		Fe2O3(T)		0.65	4.9	1.88	0.99	6.2				6.93	9.92	Fe2O3(T)	9.36
FeO										5.29	7.85	FeO	3.78									8.35	4.27	FeO						3.96	8.4				3.63	FeO	4.82						3.53	0.55	3.24			FeO
Fe2O3										5.33	3.45	Fe2O3	2.82									5.86	3.2	Fe2O3						0.97	1.15				1.49	Fe2O3	1.13						0.31	9.32	1.49			Fe2O3
Fe2O3Total	18.98	23.24	18.34	25.56	15.6	13.28	18.56	16.02	13.76	11.2078	12.1722	Fe2O3Total	7.02	5.54	14	12.88	13.6	8.54	5.6	12.56	15.58	15.1378	7.94444	Fe2O3Total	10.48	5.41	4.21	6.03	8.1	5.37	10.4833	5.04	0.52	5.22	5.52333	Fe2O3Total	6.48556	0.65	4.9	1.88	0.99	6.2	4.23222	9.93111	5.09	6.93	9.92	Fe2O3Total	9.36
MnO	0.221	0.228	0.196	0.284	0.229	0.231	0.207	0.248	0.215	0.32	0.27	MnO	0.2	0.16	0.268	0.261	0.26	0.229	0.243	0.203	0.246	0.27	0.2	MnO	0.236	0.129	0.099	0.132	0.123	0.12	0.16	0.191	0.118	0.134	0.17	MnO	0.14	0.176	1.489	0.16	0.75	0.24	0.2	0.2	0.82	0.297	0.303	MnO	0.268
MgO	10.33	5.74	9.41	9.13	5.93	5.9	8.82	7.03	7.54	4.36	3.8	MgO	6.95	1.58	5.87	4.96	5.21	4.6	4.52	5.8	5.62	7.15	5.29	MgO	2.77	0.31	0.18	0.17	0.11	0.39	0.51	0.97	0.25	1.13	0.6	MgO	0	0.19	1	0.42	0.38	0.96	0.09	0.44	0.11	0.95	2.02	MgO	2.16
CaO	14.96	25.28	22.01	14.52	16.05	15.72	18.14	17.34	18.98	10.28	9.62	CaO	14.41	5.57	13.77	12.5	13.15	15.57	14.33	16.51	18.02	16.45	7.62	CaO	7.42	2.32	1.68	1.35	0.95	1.21	1.07	13.36	21.42	7.11	1.48	CaO	2.96	42.34	46.81	45.94	50	48.1	48.45	46.88	41.78	4.07	8.21	CaO	9.19
Na2O	1.56	0.9	0.8	1.2	2.36	2.34	0.94	2.54	2.24	3.94	5.06	Na2O	5.05	5.49	2.77	3.74	3.33	4.74	5.49	4.56	2.33	3.32	3.07	Na2O	4.34	9.75	7.7	8.41	9.35	9.01	8.78	4.16	2.76	3.98	9.8	Na2O	9.22	0.47	0.73	0.88	0.21	1.16	0.32	0.52	0.85	10.21	6.82	Na2O	6.23
K2O	1.48	0.41	0.2	0.92	1.29	1.98	1.15	0.83	1.04	3.47	2.67	K2O	0.42	4.09	2.76	2.31	2.54	0.5	1.89	0.93	1.16	0.68	4.82	K2O	4.65	6.58	8.16	6.92	6.35	7.28	6.26	4.32	4.63	6.67	6.77	K2O	5.3	2.34	0.48	0.64	0.09	0.1	0.25	1.7	1.39	3.73	2.44	K2O	3.31
TiO2	6.113	18.287	8.619	7.342	6.782	6.825	10.16	6.956	6.087	4.17	3.48	TiO2	1.75	1.64	5.5	5.672	5.04	2.559	0.435	3.547	5.256	8.79	5.16	TiO2	2.356	0.427	0.163	0.165	0.166	0.73	0.52	0.125	0.014	0.324	0.85	TiO2	0.31	0.038	0.106	0.078	0	0.34	0.32	0.15	0.53	0.943	1.689	TiO2	2.508
P2O5	1.84	5.43	3.16	0.24	1.68	2.09	2.51	1.71	2.16	0.99	0.78	P2O5	1.31	0.28	1.63	1.42	1.51	1.51	1.45	2.74	2.2	1.87	1.16	P2O5	0.8	0.08	0.03	-0.01	-0.01	0.04	0.03	0.35	0.02	0.31	0.03	P2O5	0.05	0.02	0.06	0.21	0.01	1.51	0.73	0.04	0.32	0.18	0.44	P2O5	0.46
CO2										6.77	2.56		1.76									-	-							-	-				-		0.35						34.14	34.81	32.16
H2O+										3.67	4.28		5.5									2.37	3.21							1.89	2.33				2.48		234						1.81	1.34	2.44
LOI	2.128	0.16	0.39	1.57	5.722	6.11	4.415	4.69	4.41			LOI		7.594	6.869	9.683	5.244	9.249	11.89	4.14	7.01			LOI	5.802	1.85	2.3	1.93	1.18			13.11	19.04	7.14		LOI		32.86	36.71	34.64	45	31.5				4.59	7.47	LOI	7.91
Total	98.98	100.01	98.86	98.73	99.13	99.08	98.93	98.69	98.89	99.72	99.69	Total	99.84	98.6	99	99.19	99.32	98.67	98.66	99.5	98.52	100.59	99.89	Total	100.5	99.09	98.98	98.92	100.43	99.9	99.6	98.64	96.87	98.76	100.47	Total	99.89	95.52	98.59	98.62	97.9	99.2	98.95	97.83	99.05	98.88	99.07	Total	99.59
Rb	23	4.96567	2.37304	21.2584	26	39	25	15.7224	19.2145	51	50	Rb	29	43	65	52	59	11	42.648	19.3586	37.3424	128	54	Rb	106	114.779	153.591	149.455	135.88	133	96	78	77.5104	117.6	29	Rb	134	41.1918	21.2648	8.47779	0.58	0.3	26	30	49	76.639	59.525	Rb	73.3158
Sr	987	1158	632	401	983	1505	692	2125	1521	1710	2236	Sr	1216	1139	1724	1835	1624	1594	1514	758	2322	1321	893	Sr	1385	999	1334	568	304	847	424	2841	5900	1335	756	Sr	1087	14281	11533	12714	14600	8770	8170	16743	6490	2709	1788	Sr	2001
Ba	642	50	23	295	343	600	328	103	63	620	788	Ba	178	1537	1138	815	909	362	796	211	611	1800	860	Ba	335	1206	734	447	63	1080	415	3722	4124	4144	0	Ba	1056	2403	3533	1648	1580	897	460	1056	1280	2098	1426	Ba	1670
Nb	48	644.047	342.747	38.0324	175	238	182	357.643	278.613	136	143	Nb	17	100	141	195	140	110	69.5762	155.118	281.175	33	172	Nb	104	64.8633	38.5127	30.9452	4.9775	116	18	16	14.4836	73.0656	230	Nb	25	9.4541	9.12471	17.7494	2.25	2.95	10	66	0	196.708	137.462	Nb	100.232
Y	26	151	74	17	67	63	62	70	63	37	25	Y	15	13	47	55	41	204	37	43	55	0	27	Y	25	4	3	4	<	1	0	78	146	14	38	Y	13	144	103	65	87.7	71.6	65	121	65	17	37	Y	59
Zr	256	199	304	211	556	359	243	231	185	429	331	Zr	301	368	497	488	520	1276	387	356	726	261	412	Zr	850	369	436	607	712	515	712	6411	15505	941	325	Zr	430	12474	10	177	3.41	2.3	114	82	40	737	842	Zr	1095
Hf	8.8	13.2105	12.7726	7.78907	15.6	9.5	7.9	7.78832	7.70338	nd	nd	Hf	nd	7.9	12.8	11.6	13.2	29.7	7.29313	9.25057	16.2268	nd	nd	Hf	15.6	6.86407	7.61385	9.66295	12.3207	nd	nd	50.9	127	20.8088	nd	Hf	nd	98.1133	1.19102	3.62375	0.05	0.06	nd	nd	nd	11.8651	17.5752	Hf	22.7592
Ta	3.2	113.665	37.7115	3.40661	27.7	34.2	34.2	24.3093	20.1575	nd	nd	Ta	nd	2.6	11.1	18.4	11.1	4.6	0.626918	11.8385	15.1452	nd	nd	Ta	5.4	1.21966	0.328749	0.294236	<	nd	nd	0.2	0.105538	1.36248	nd	Ta	nd	<	<	0.101223	0.01	0.04	nd	nd	nd	3.51896	2.14672	Ta	1.94365
Cr	<	<	<	<	<	10	<	<	<	0	0	Cr	0	<	<	9	<	<	<	<	<	0	0	Cr	<	<	26.4396	<	<	0	0	<	<	<	0	Cr	46	<	<	<	1	14	0	0	0	<	<	Cr	<
Sc	25.6	20	27	55	14	19	34.7	18	17	nd	nd	Sc	nd	1.2	15	11.4	13.8	6.5	10	9	9	nd	nd	Sc	7.5	<	<	<	1	nd	nd	1.6	2	2	nd	Sc	nd	<	<	0.2	nd	nd	nd	nd	nd	<	1	Sc	4
Ni	55	73.9131	51.3762	68.1473	8	10	27	21.1838	63.3499	2	2	Ni	0	9	11	4	10	2	<	28.9298	31.6295	1	1	Ni	7	<	<	<	<	1	0	2	<	<	0	Ni	8	<	<	<	10	6	0	0	0	<	<	Ni	<
Co	58	39.5536	44.8676	75.0506	34	30	60	40.1431	41.6413	18	28	Co	9	9	33	26	33	10	9.24781	26.6232	27.2178	0	19	Co	12	1.95194	1.257	1.7915	1.65735	0	4	2	<	2.94577	32	Co	0	<	11.9043	<	7		8	15	10	7.18158	12.2564	Co	12.9845
V	476	512	382	637	461	410	500	437	365	319	313	V	147	227	452	448	474	302	160	278	399	113	149	V	349	175	107	141	138	95	183	282	12	266	230	V	248	11	28	75.0619	12	192	62	3	52	208	382	V	353
Cu	140	32.1012	107.937	63.3387	100	230	330	43.469	195.041	67	80	Cu	0	20	90	90	110	20	<	33.9223	61.6056	0	202	Cu	30	<	<	<	<	0	0	10	<	<	10	Cu	6	<	112.862	32.8488			37	98	25	13.8077	39.5828	Cu	108.735
Zn	64	206.895	174.77	277.178	54	57	266	126.31	129.262	101	69	Zn	58	40	85	64	58	11	157.163	142.08	251.72	48	65	Zn	87	62.4975	104.354	104.287	68.3288	74	79	81	<	94.2939	71	Zn	70	<	324.916	16	36	55	40	38	196	345.944	219.042	Zn	251.177
Pb	<	<	<	<	<	12	<	<	<	0	0	Pb	2	<	9	19	14	<	26.1138	<	<	1	7	Pb	<	<	6.56573	<	<	5	5	18	9.41505	10.054	0	Pb	9	6.06608	17.0576	<	9.93	1.46	0	7	4	22.5193	12.3692	Pb	18.9168
Ga	20	26.0656	20.5218	21.9401	18	22	21	15.7455	13.5616	0	0	Ga	0	27	25	23	22	15	15.923	14.9381	21.2599	0	0	Ga	40	36.8206	44.6971	53.7806	59.2032	0	0	34	35.2987	42.7754	0	Ga	0	16.9841	10.4564	9.20501	nd	nd	0	0	0	56.805	41.2657	Ga	35.671
Th	2.2	272.651	43.7861	2.7901	8.3	44.6	45.7	34.8735	21.1769	0	0	Th	0	2	9.4	15.4	5.5	11.5	15.1167	12.7525	14.3809	0	0	Th	7.7	0.77588	2.53629	3.9152	0.234529	4	0	67.5	103.159	6.11434	18	Th	2	86.6731	18.8833	0.90536	3.35	0.44	5	2	3	17.3435	3.16384	Th	3.29402
U	0.4	20.243	7.92859	0.842315	1.3	5.5	4.8	7.44946	6.15087	nd	nd	U	nd	0.6	3.9	5	1.7	3.3	0.851843	3.41246	3.47316	nd	nd	U	2.9	0.202802	0.438277	0.799866	<	nd	nd	9.7	12.8696	0.86594	nd	U	nd	13.2448	0.753041	0.121151	0.19	0.02	nd	nd	nd	6.97219	1.448	U	2.5801
La	61.1	1370	478.871	36.0736	164	366	322	360.238	303.058	134	112	La	20	25.3	117	178	92.4	72.1	117.447	185.034	227.155	7	55	La	64.5	12.6063	55.2957	7.82241	1.44846	5	0	80.6	117.055	42.6898	260	La	33	257.279	719.425	299.359	339	284	285	568	227	124.284	48.2474	La	36.1291
Ce	150	3330	996.845	72.3766	421	1010	954	612.197	520.685	238	199	Ce	64	48.3	253	370	221	181	222.239	348.85	411.874	70	108	Ce	133	26.7527	75.2612	12.4726	2.87425	100	80	152	193.244	70.5982	380	Ce	120	390.538	1270	479.721	531	434	583	883	438	165.037	61.4976	Ce	50.4439
Pr	18	417.503	118.271	9.19456	49.5	102	105	68.9718	57.7301	nd	nd	Pr	nd	4.59	27.9	38.9	25.7	23.1	25.9396	38.8424	45.6807	nd	nd	Pr	14	3.17669	6.88879	1.2493	0.315256	nd	nd	13.5	15.3197	7.3109	nd	Pr	nd	36.1739	124.277	43.4742	50.9	47	nd	nd	nd	14.7531	6.12419	Pr	5.57288
Nd	76.1	1720	482.039	40.9397	201	385	406	267.417	223.972	nd	nd	Nd	nd	15.7	110	146	103	109	100.019	150.598	174.109	nd	nd	Nd	53.2	12.125	21.8893	4.30336	1.17681	nd	nd	46.3	63.8812	26.0651	nd	Nd	nd	124.953	408.193	141.828	157	152	nd	nd	nd	45.2446	22.2843	Nd	22.4385
Sm	14.8	288.856	89.3079	9.2395	36.7	63.4	69.9	50.0235	43.3122	nd	nd	Sm	nd	2.8	20.7	26.6	18.6	31	17.223	28.9648	34.1119	nd	nd	Sm	9.2	2.2776	2.91765	0.758692	0.219537	nd	nd	8	12.1474	4.46437	nd	Sm	nd	20.5191	51.386	23.561	22.8	22.1	nd	nd	nd	6.06677	4.65294	Sm	5.61221
Eu	4.88	69.9747	23.8901	2.76479	11.9	18.9	21	14.2158	12.6714	nd	nd	Eu	nd	1.09	6.96	9	6.12	12.9	4.8282	8.12806	10.1195	nd	nd	Eu	3.07	0.658634	0.714029	0.245738	0.066782	nd	nd	3.15	4.11101	1.27494	nd	Eu	nd	6.09023	12.5552	6.53453	6.43	5.93	nd	nd	nd	1.62692	1.61431	Eu	2.05457
Gd	11.7	170.683	60.3491	7.53785	27.5	39.1	46.8	33.736	34.3748	nd	nd	Gd	nd	2.5	16.8	21.4	14.8	34.4	13.2695	21.9551	27.2091	nd	nd	Gd	7.3	1.6835	1.6199	0.611453	0.159414	nd	nd	8.3	13.078	3.57095	nd	Gd	nd	19.2161	32.1982	16.5615	18.6	17.8	nd	nd	nd	4.02829	4.82788	Gd	6.4526
Tb	1.6	17.4187	6.87472	0.998642	3.8	5	5.7	4.79509	4.43355	nd	nd	Tb	nd	0.4	2.4	3	2.1	6.6	1.71087	2.79389	3.54318	nd	nd	Tb	1.1	0.226877	0.170374	0.103672	<	nd	nd	1.7	2.66723	0.527298	nd	Tb	nd	3.33957	3.78013	2.48162	2.6	2.35	nd	nd	nd	0.56758	0.902262	Tb	1.28307
Dy	7.3	60.2763	25.5592	4.06036	17.8	21.4	22.6	20.8906	18.3449	nd	nd	Dy	nd	2.6	11.6	14.3	9.8	42.1	7.64092	11.197	14.8369	nd	nd	Dy	5.4	1.06101	0.65695	0.526156	0.140026	nd	nd	11.6	19.6027	2.47822	nd	Dy	nd	19.3889	16.8572	12.359	14.6	12.5	nd	nd	nd	2.56389	4.9736	Dy	7.36896
Ho	1.1	7.86892	3.67763	0.660396	2.8	3.2	3.2	2.96872	2.91188	nd	nd	Ho	nd	0.5	1.9	2.3	1.6	8.4	1.38267	1.73557	2.37105	nd	nd	Ho	1	0.18419	0.11771	0.120225	<	nd	nd	2.7	4.71253	0.505006	nd	Ho	nd	4.81811	3.38625	2.21061	2.97	2.41	nd	nd	nd	0.500095	1.1158	Ho	1.70703
Er	2.6	15.2718	7.7277	1.50903	6.6	7	6.7	6.53851	6.1595	nd	nd	Er	nd	1.4	4.8	5.5	4.1	24.6	3.66455	4.01819	5.48256	nd	nd	Er	2.7	0.520942	0.399976	0.425257	0.189769	nd	nd	9.6	17.7236	1.53321	nd	Er	nd	16.8576	10.3109	6.47817	8.45	6.4	nd	nd	nd	1.53753	3.43424	Er	5.50228
Tm	0.3	1.14492	0.557994	0.158858	0.79	0.76	0.66	0.62811	0.538805	nd	nd	Tm	nd	0.21	0.61	0.67	0.53	3.46	0.420122	0.335037	0.495856	nd	nd	Tm	0.4	0.079899	0.0630651	0.084457	0.059147	nd	nd	1.67	3.14386	0.203945	nd	Tm	nd	2.53312	1.34502	0.851289	1.24	0.84	nd	nd	nd	0.209919	0.464644	Tm	0.795252
Yb	1.6	5.48313	2.88038	0.902564	4.1	3.9	3.1	3.19287	2.84811	nd	nd	Yb	nd	1.3	3.3	3.6	3	20.2	2.56686	1.82312	2.55354	nd	nd	Yb	2.7	0.703288	0.58266	0.829329	0.749922	nd	nd	11.1	21.1695	1.43048	nd	Yb	nd	16.8824	8.91752	5.11547	8.03	5.09	nd	nd	nd	1.4385	3.03477	Yb	5.17496
Lu	0.22	0.539711	0.347917	0.140417	0.48	0.42	0.32	0.37927	0.370851	nd	nd	Lu	nd	0.2	0.42	0.44	0.39	2.6	0.434763	0.253061	0.35012	nd	nd	Lu	0.44	0.17129	0.140456	0.203138	0.236396	nd	nd	1.73	3.3939	0.271354	nd	Lu	nd	2.88848	1.37502	0.725668	1.07	0.69	nd	nd	nd	0.2565	0.531972	Lu	0.818222
Q	0	0	0	0	0	0	0	0	0	0	0	Q	0	0	0	0	0	0	0	0	0	0	0	Q	0	0	0	0	0	0	0	0	0	0	0	Q	0	0	0	0	0	0	0	0	0	0	0	Q	0
Cor	0	0	0	0	0	0	0	0	0	0	0	Cor	0	1.48	0	0	0	0	0	0	0	0	0	Cor	0	0	0	0	0	0	0	0	0	0	0	Cor	0	0	0	0	0	0	0	0	0	0	0	Cor	0
Ort	0	0	0	0	0	0	0	0	0	13.66	16.96	Ort	2.68	26.64	0	4.39	8.45	0	0	0	0	0	29.44	Ort	29.19	40.06	49.95	42.27	37.93	43.78	37.83	28.42	0	43.13	40.74	Ort	32.13	0	0	0	0	0	0	0	0	23.44	15.83	Ort	21.45
Ab	0	0	0	0	0	0	0	0	0	0	7.73	Ab	6.34	8.54	0	0	0	0	0	0	0	0	8.17	Ab	17.1	2.93	8.54	15.32	13.98	7.44	11.83	0	0	17.42	4.16	Ab	22.64	0	0	0	0	0	0	0	0	11.58	13.55	Ab	7.28
An	13.4	2.07	5.54	9.86	12.34	11.84	6.99	11.8	10.69	8.81	8.81	An	15.11	28.45	5.63	6.35	9.25	18.26	9.61	10.91	10.19	9.52	21.5	An	6.39	0	0	0	0	0	0	8.58	8.41	4.72	0	An	0	1.67	0	3.77	0	3.93	6.04	2.26	4.19	0	8.81	An	6.04
Ne	7.48	3.98	3.77	5.78	11.64	11.73	4.62	12.49	10.87	20.24	20.74	Ne	21.56	23.11	13.97	19.32	16.37	24.07	28.56	22.05	11.66	15.25	10.12	Ne	11.87	36.76	26.3	28.88	28.84	32.89	21.12	22.37	12.93	10.52	35.88	Ne	29.56	2.68	3.85	4.85	0.23	6.26	1.68	2.89	4.54	39.29	26.99	Ne	27.37
Le	7.18	1.83	0.95	4.47	6.43	10.03	5.71	4.12	5.1	7.31	0	Le	0	0	14.07	8.62	5.99	2.56	9.94	4.54	5.87	3.15	0	Le	0	0	0	0	0	0	0	1.2	21.93	0	0	Le	0	13.49	0	3.57	0	0	1.08	0	6.23	0	0	Le	0
Kp	0	0	0	0	0	0	0	0	0	0	0	Kp	0	0	0	0	0	0	0	0	0	0	0	Kp	0	0	0	0	0	0	0	0	0	0	0	Kp	0	0	5.21	0	3.48	4.6	0.39	4.3	2.25	0	0	Kp	0
Hy	0	0	0	0	0	0	0	0	0	0	0	Hy	0	0	0	0	0	0	0	0	0	0	0	Hy	0	0	0	0	0	0	0	0	0	0	0	Hy	0	0	0	0	0	0	0	0	0	0	0	Hy	0
Di	18.44	18.63	38.49	21.86	39.85	36.04	25.05	29.04	35.86	31.18	29.42	Di	41.97	0	41.41	34.94	38.05	35.73	36.19	36.32	37.22	40.56	7.58	Di	21.93	7.41	6.1	5.32	4.26	4.94	4.54	14.01	2.53	11.46	6.11	Di	3.81	0	0	0	0	0	0	0	0	11.23	20.2	Di	17.04
Wo	0	0	0	0	0	0	0	0	0	0.77	0.18	Wo	0	0	0	3.76	1.07	2.93	3.91	0	0	1.26	0	Wo	0	1.13	0.59	0.36	0	0	0	20.78	12.88	7.39	0	Wo	4.36	0	0	0	0	0	0	0	0	2.81	3.4	Wo	8.13
Ol	21.07	3.63	10.09	22.97	1.74	1.05	12.06	7.98	5.65	0	0	Ol	1.95	3.86	0.52	0	0	0	0	2.81	4.32	0	7.08	Ol	0.05	0	0	0	1.86	0.35	4.32	0	0	0	0.6	Ol	0	1.39	11.21	3.22	3.76	9.1	5.02	12.35	6.34	0	0	Ol	0
La	8.92	18.88	11.62	11.61	3.68	3.99	12.53	9.98	9	0	0	La	0	0	1.83	0	0	2.98	3.64	3.56	8.04	3.24	0	La	0	0	0	0	0	0	0	0	40.95	0	0	La	0	80.36	91.97	83.26	101.32	82.23	82.13	86.51	72.81	0	0	La	0
Ac	0	0	0	0	0	0	0	0	0	0	0	Ac	0	0	0	0	0	0	0	0	0	0	0	Ac	0	9.98	7.71	4.33	11.24	8.3	18.21	0	0	0	10.2	Ac	2.48	0	0.69	0	0.44	0	0	0	0	6.86	0	Ac	0
Na_ms	0	0	0	0	0	0	0	0	0	0	0	Na_ms	0	0	0	0	0	0	0	0	0	0	0	Na_ms	0	0.66	0.37	0	0	0	1.03	0	0	0	0.57	Na_ms	0	0	0	0	0.32	0	0	0	0	0	0	Na_ms	0
Mag	6.76	3.68	4.98	8.16	6.14	5.7	5.91	6.04	5.13	6.49	7.03	Mag	3.42	3.72	6.79	6.65	6.68	4.08	3.28	5.83	6.07	5.81	0.02	Mag	6.66	0	0	3.19	1.55	0.75	0	3.36	0.27	3.83	0	Mag	4.26	0.23	0.98	0.53	0	1.58	0.93	3.07	1.54	2.4	6.52	Mag	6.24
Hem	0	1.24	0	0	0	0	0	0	0	0	0	Hem	0	0	0	0	0	0	0	0	0	0	3.09	Hem	0	0	0	0	0	0	0	0	0	0	0	Hem	0	0	0	0	0	0	0	0	0	0	0	Hem	0
Ilm	12.15	33.58	16.83	14.65	13.86	14.17	20.71	14.17	12.24	8.87	7.1	Ilm	3.58	3.43	11.49	12.14	10.26	5.38	0.93	7.1	10.9	16.73	10.13	Ilm	4.75	0.83	0.32	0.32	0.31	1.41	1.01	0.27	0.02	0.67	1.64	Ilm	0.6	0.08	0.25	0.17	0	0.76	0.7	0.34	1.17	1.9	3.52	Ilm	5.22
Tit	0	0	0	0	0	0	0	0	0	0	0	Tit	0	0	0	0	0	0	0	0	0	0	0	Tit	0	0	0	0	0	0	0	0	0	0	0	Tit	0	0	0	0	0	0	0	0	0	0	0	Tit	0
Ru	0	0	0	0	0	0	0	0	0	0	0	Ru	0	0	0	0	0	0	0	0	0	0	0	Ru	0	0	0	0	0	0	0	0	0	0	0	Ru	0	0	0	0	0	0	0	0	0	0	0	Ru	0
Pwk	0	0	0	0	0	0	0	0	0	0	0	Pwk	0	0	0	0	0	0	0	0	0	0	0	Pwk	0	0	0	0	0	0	0	0	0	0	0	Pwk	0	0	0	0	0	0	0	0	0	0	0	Pwk	0
Ap	4.56	12.43	7.69	0.59	4.28	5.41	6.37	4.34	5.41	2.62	1.98	Ap	3.35	0.73	4.24	3.79	3.83	3.96	3.89	6.84	5.69	4.43	2.83	Ap	2.01	0.19	0.07	-0.03	-0.03	0.09	0.07	0.97	0.04	0.8	0.07	Ap	0.12	0.05	0.18	0.59	0.03	4.21	1.99	0.11	0.88	0.45	1.14	Ap	1.19
Cc	0	0	0	0	0	0	0	0	0	0	0	Cc	0	0	0	0	0	0	0	0	0	0	0	Cc	0	0	0	0	0	0	0	0	0	0	0	Cc	0	0	0	0	0	0	0	0	0	0	0	Cc	0
Ft	0	0	0	0	0	0	0	0	0	0	0	Ft	0	0	0	0	0	0	0	0	0	0	0	Ft	0	0	0	0	0	0	0	0	0	0	0	Ft	0	0	0	0	0	0	0	0	0	0	0	Ft	0
Py	0	0	0	0	0	0	0	0	0	0	0	Py	0	0	0	0	0	0	0	0	0	0	0	Py	0	0	0	0	0	0	0	0	0	0	0	Py	0	0	0	0	0	0	0	0	0	0	0	Py	0
agpaicity index: molar proportions of (Na + K)/Al	0.470349	0.709923	0.436516	0.463213	0.55669	0.601528	0.538703	0.557153	0.56516	0.780116	0.788426	agpaicity index	0.630677	0.554629	0.800692	0.806984	0.722165	0.579751	0.780997	0.691554	0.597814	0.640101	0.573794	agpaicity index	0.84631	1.13067	1.09946	1.04511	1.12371	1.08596	1.29042	0.811041	0.759723	0.896667	1.12875	agpaicity index	1.02599	0.869806	1.07503	0.650424	2.76735	0.622233	0.292954	0.797311	0.687721	1.07308	0.82483	agpaicity index	0.872446
Ta/Nb	0.0666667	0.176486	0.110027	0.0895714	0.158286	0.143697	0.187912	0.0679709	0.0723492	nd	nd		nd	0.026	0.0787234	0.094359	0.0792857	0.0418182	0.00901053	0.0763197	0.053864	nd	nd		0.0519231	0.0188035	0.00853613	0.0095083	nd	nd	nd	0.0125	0.00728674	0.0186473	nd		nd	nd	nd	0.00570289	0.00444444	0.0135593	nd	nd	nd	0.0178892	0.0156168		0.0193915
Zr/Hf	29.0909	15.0637	23.801	27.0892	35.641	37.7895	30.7595	29.6598	24.0154	nd	nd		nd	46.5823	38.8281	42.069	39.3939	42.963	53.0636	38.4841	44.7409	nd	nd		54.4872	53.7582	57.2641	62.8173	57.7891	nd	nd	125.953	122.087	45.2213	nd		nd	127.139	8.39614	48.8444	68.2	38.3333	nd	nd	nd	62.1148	47.9083		48.1124
Mg-values (Mg/Mg+Fe)	31.9263	17.5485	30.6584	23.536	24.674	27.6852	29.053	27.4387	32.0741	25.1061	21.1988		46.0371	19.7278	26.5412	24.916	24.8185	31.7013	41.0214	28.4655	23.7129	28.9275	36.4594		18.5511	4.70542	3.55339	2.37177	1.1567	5.8897	4.02348	14.2254	29.293	15.7214	8.5596		0	20.1206	14.9559	16.1434	24.855	11.772	1.79951	3.67746	1.82821	10.5649	14.9277		16.5873
The concentrations of the major elements (Si, Al, Ti, Ca, Mg, Fe, Mn, Na, K, P) F and S are in wt%. The concentration of the rest of elements												The concentrations of the major elements (Si, Al, Ti, Ca, Mg, Fe, Mn, Na, K, P) F and S are in wt%. The concentration of the rest of elements												The concentrations of the major elements (Si, Al, Ti, Ca, Mg, Fe, Mn, Na, K, P) F and S are in wt%. The concentration of the rest of elements												The concentrations of the major elements (Si, Al, Ti, Ca, Mg, Fe, Mn, Na, K, P) F and S are in wt%. The concentration of the rest of elements												The concentrations of the major elements (Si, Al, Ti, Ca, Mg, Fe, Mn, Na, K, P) F and S are in wt%. The concentration of the rest of elements
is expressed in parts per million, ppm. < indicate below the detection limit. Nd: not determined.												is expressed in parts per million, ppm. < indicate below the detection limit. Nd: not determined.												is expressed in parts per million, ppm. < indicate below the detection limit. Nd: not determined.												is expressed in parts per million, ppm. < indicate below the detection limit. Nd: not determined.												is expressed in parts per million, ppm. < indicate below the detection limit. Nd: not determined.
Facies: 1). Las Montañetas; 2). Jablitos; 3).Montaña de los Frailes; 4). Barranco del Agua Salada												Facies: 1). Las Montañetas; 2). Jablitos; 3).Montaña de los Frailes; 4). Barranco del Agua Salada												Facies: 1). Las Montañetas; 2). Jablitos; 3).Montaña de los Frailes; 4). Barranco del Agua Salada												Facies: 1). Las Montañetas; 2). Jablitos; 3).Montaña de los Frailes; 4). Barranco del Agua Salada												Facies: 1). Las Montañetas; 2). Jablitos; 3).Montaña de los Frailes; 4). Barranco del Agua Salada
* Data from Barrera et al., (1981)												* Data from Barrera et al., (1981)												* Data from Barrera et al., (1981)												* Data from Barrera et al., (1981); ** data from Hoernle et al., (2002).												* Data from Barrera et al., (1981)
[truncated: 3 more columns]
