# Supplementary material
Source: MDPI journal article supplement (https://www.mdpi.com/2075-163X/14/3/295)

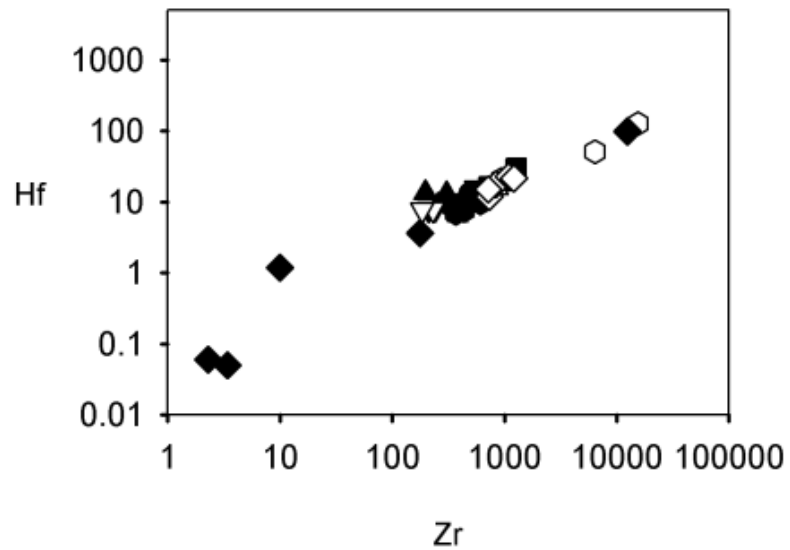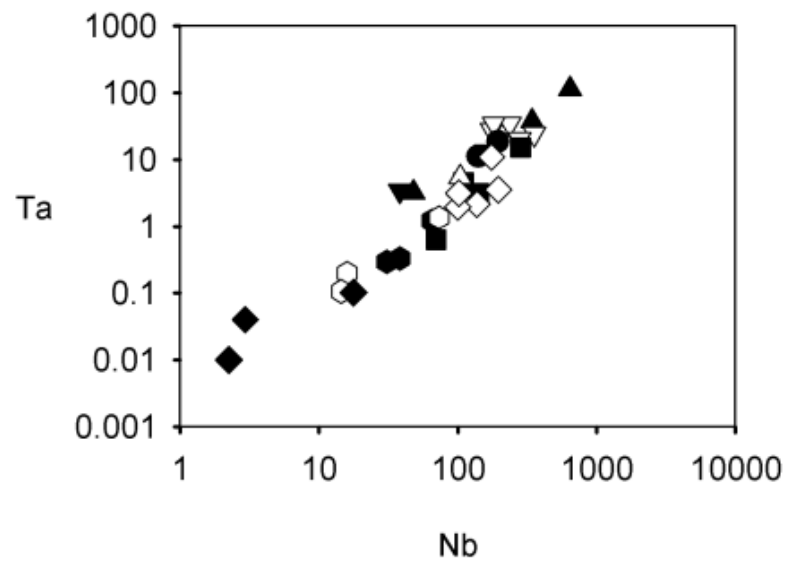

Figure S18. Hf-Zr and Ta-Nb (in ppm) relationships for the studied rocks. Symbols as in Figure S14a and 14b.

Supplement: s1 [file s1]

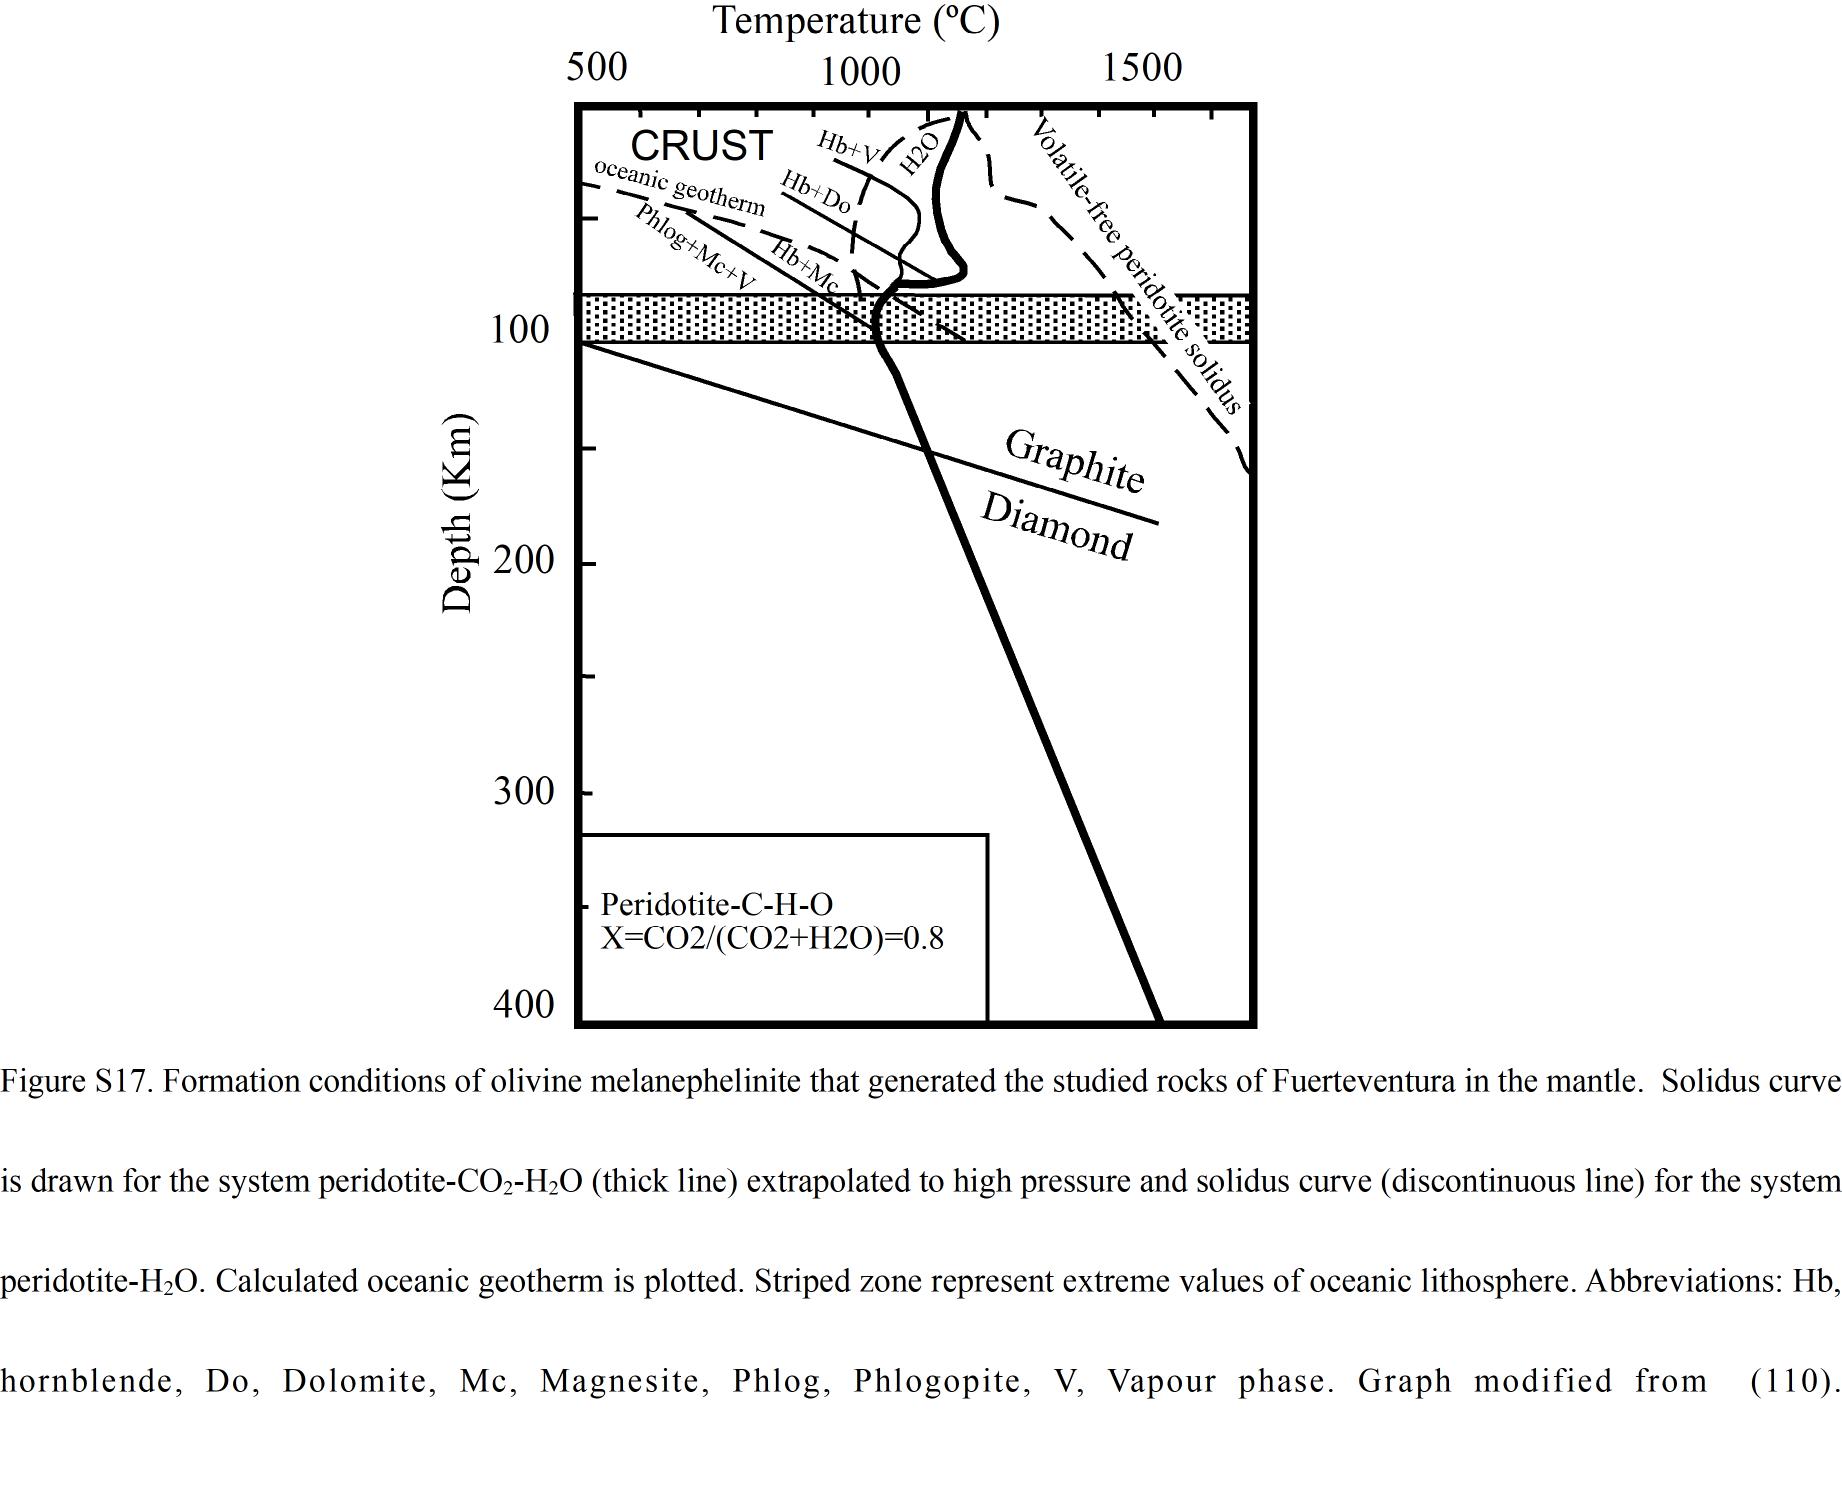

Supplement: s1 [file s1 › Figure S17.jpg]

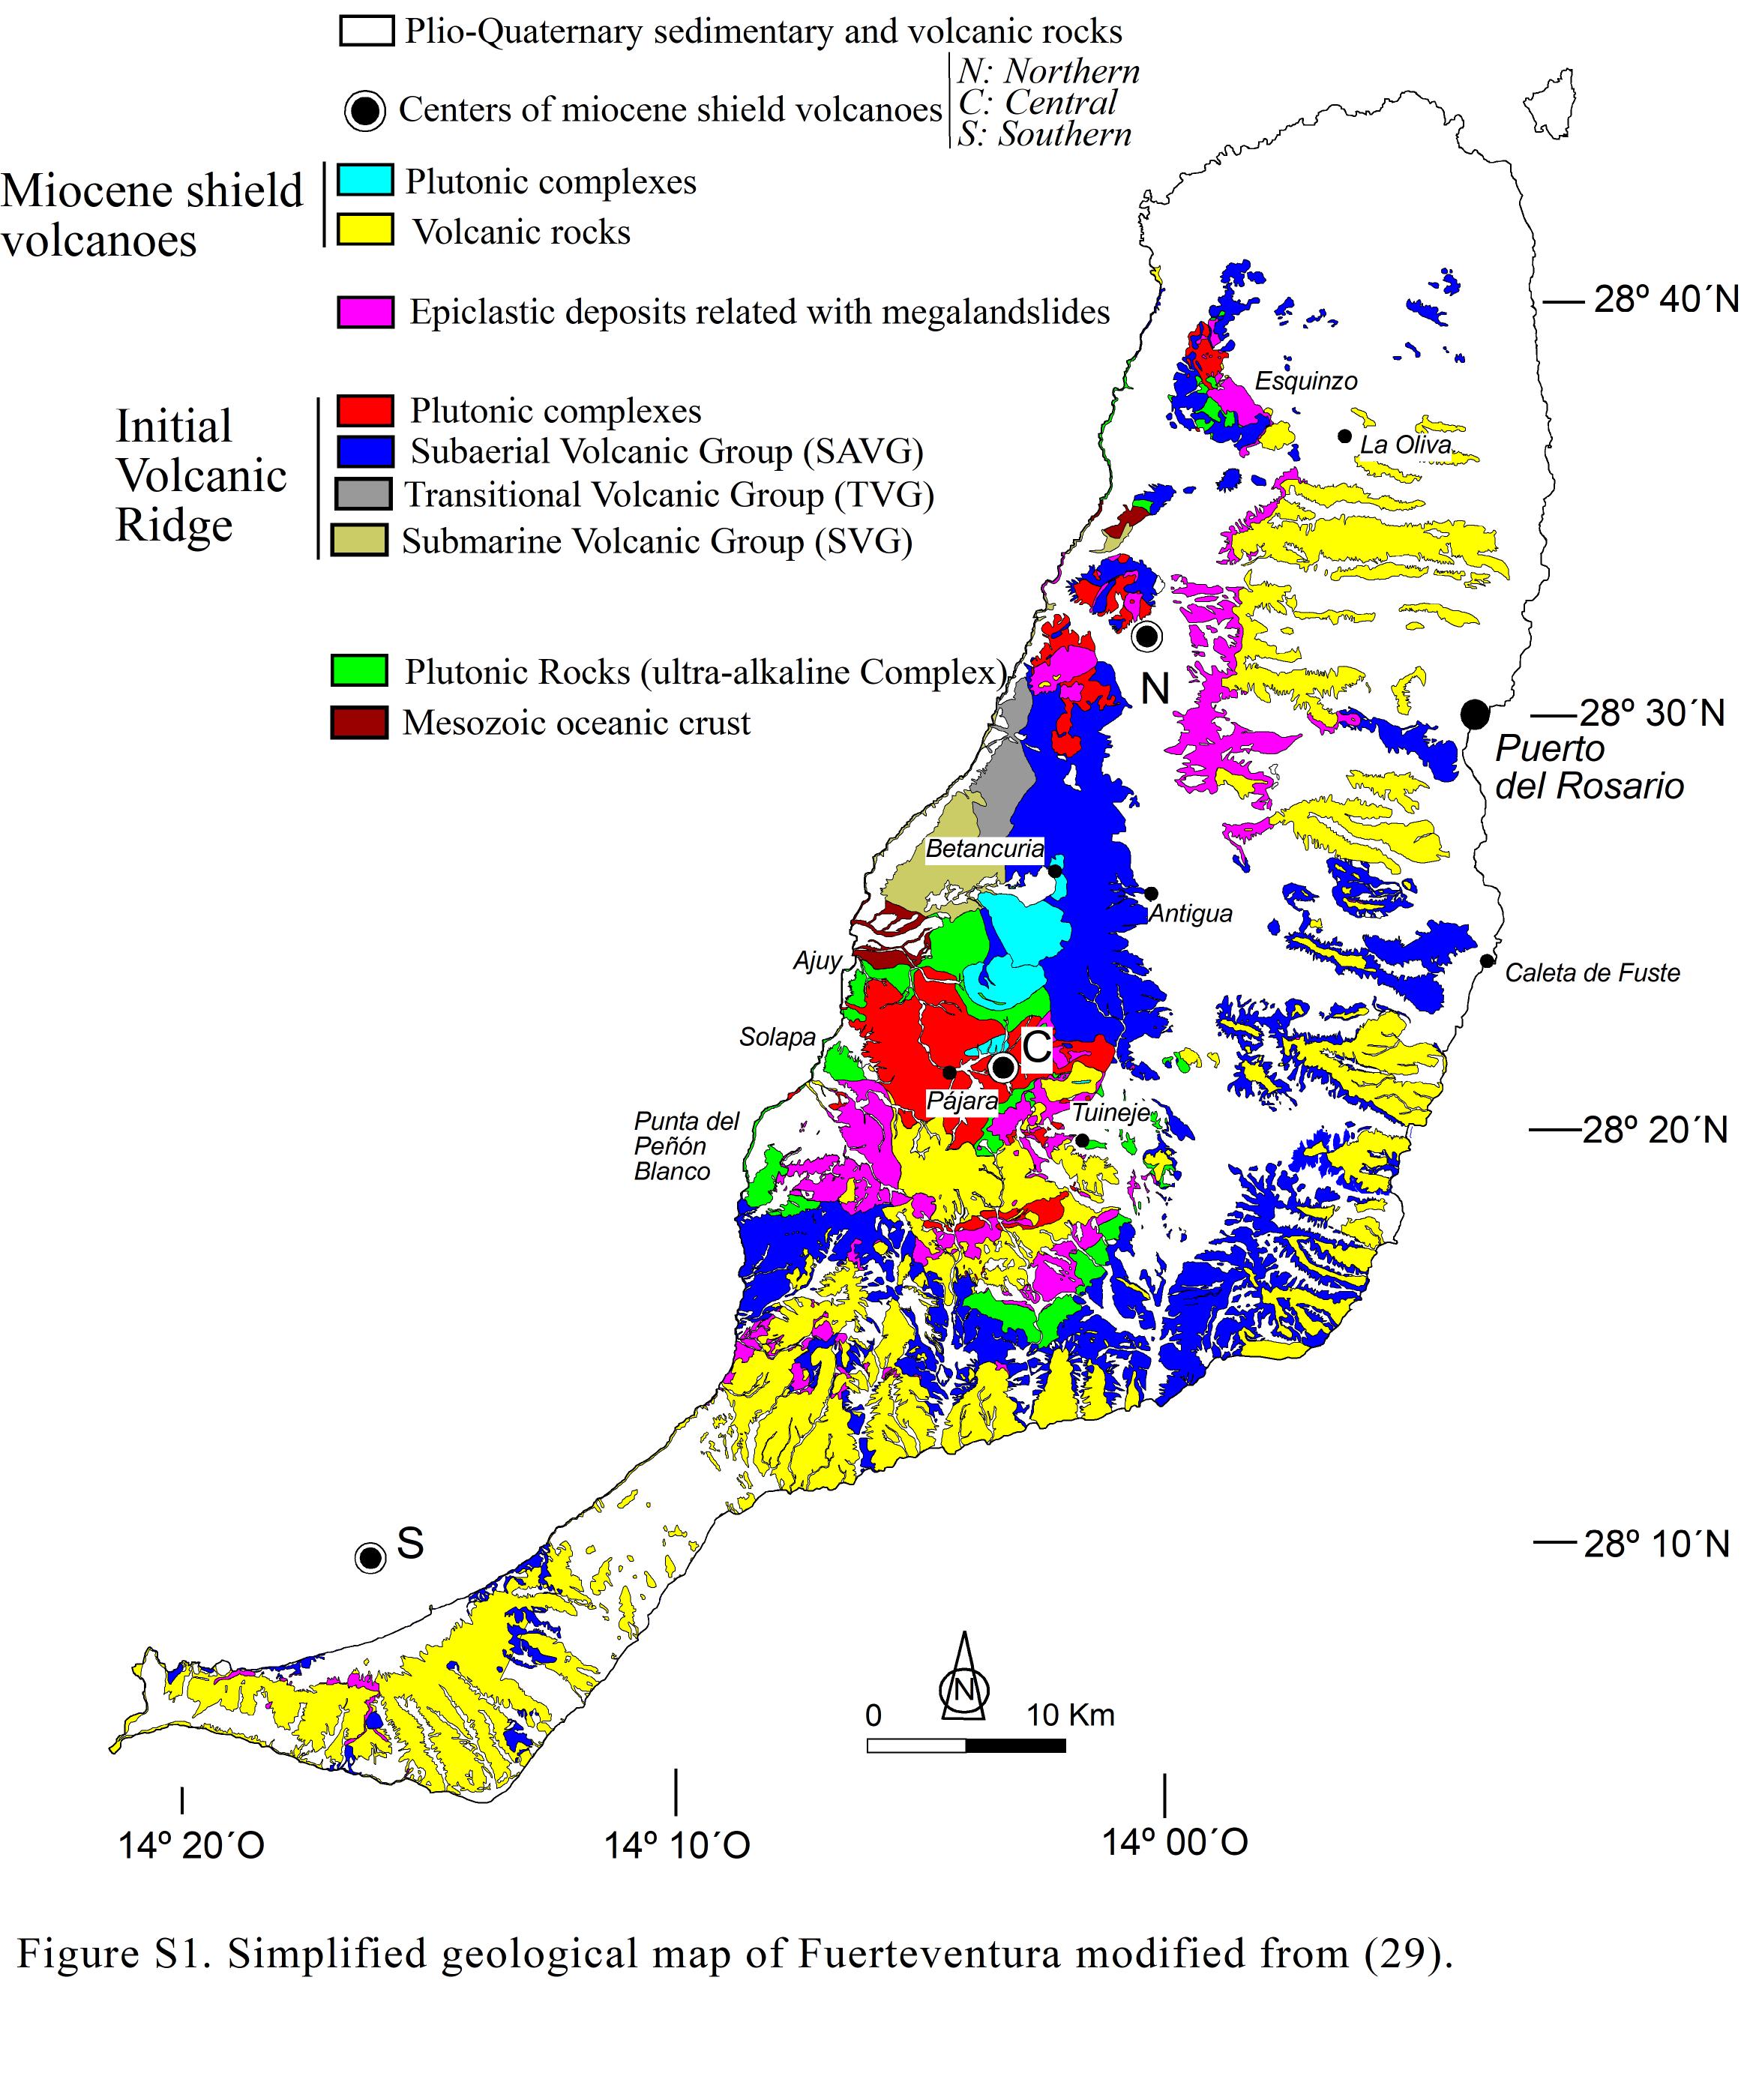

Supplement: s1 [file s1 › Figure S1.jpg]

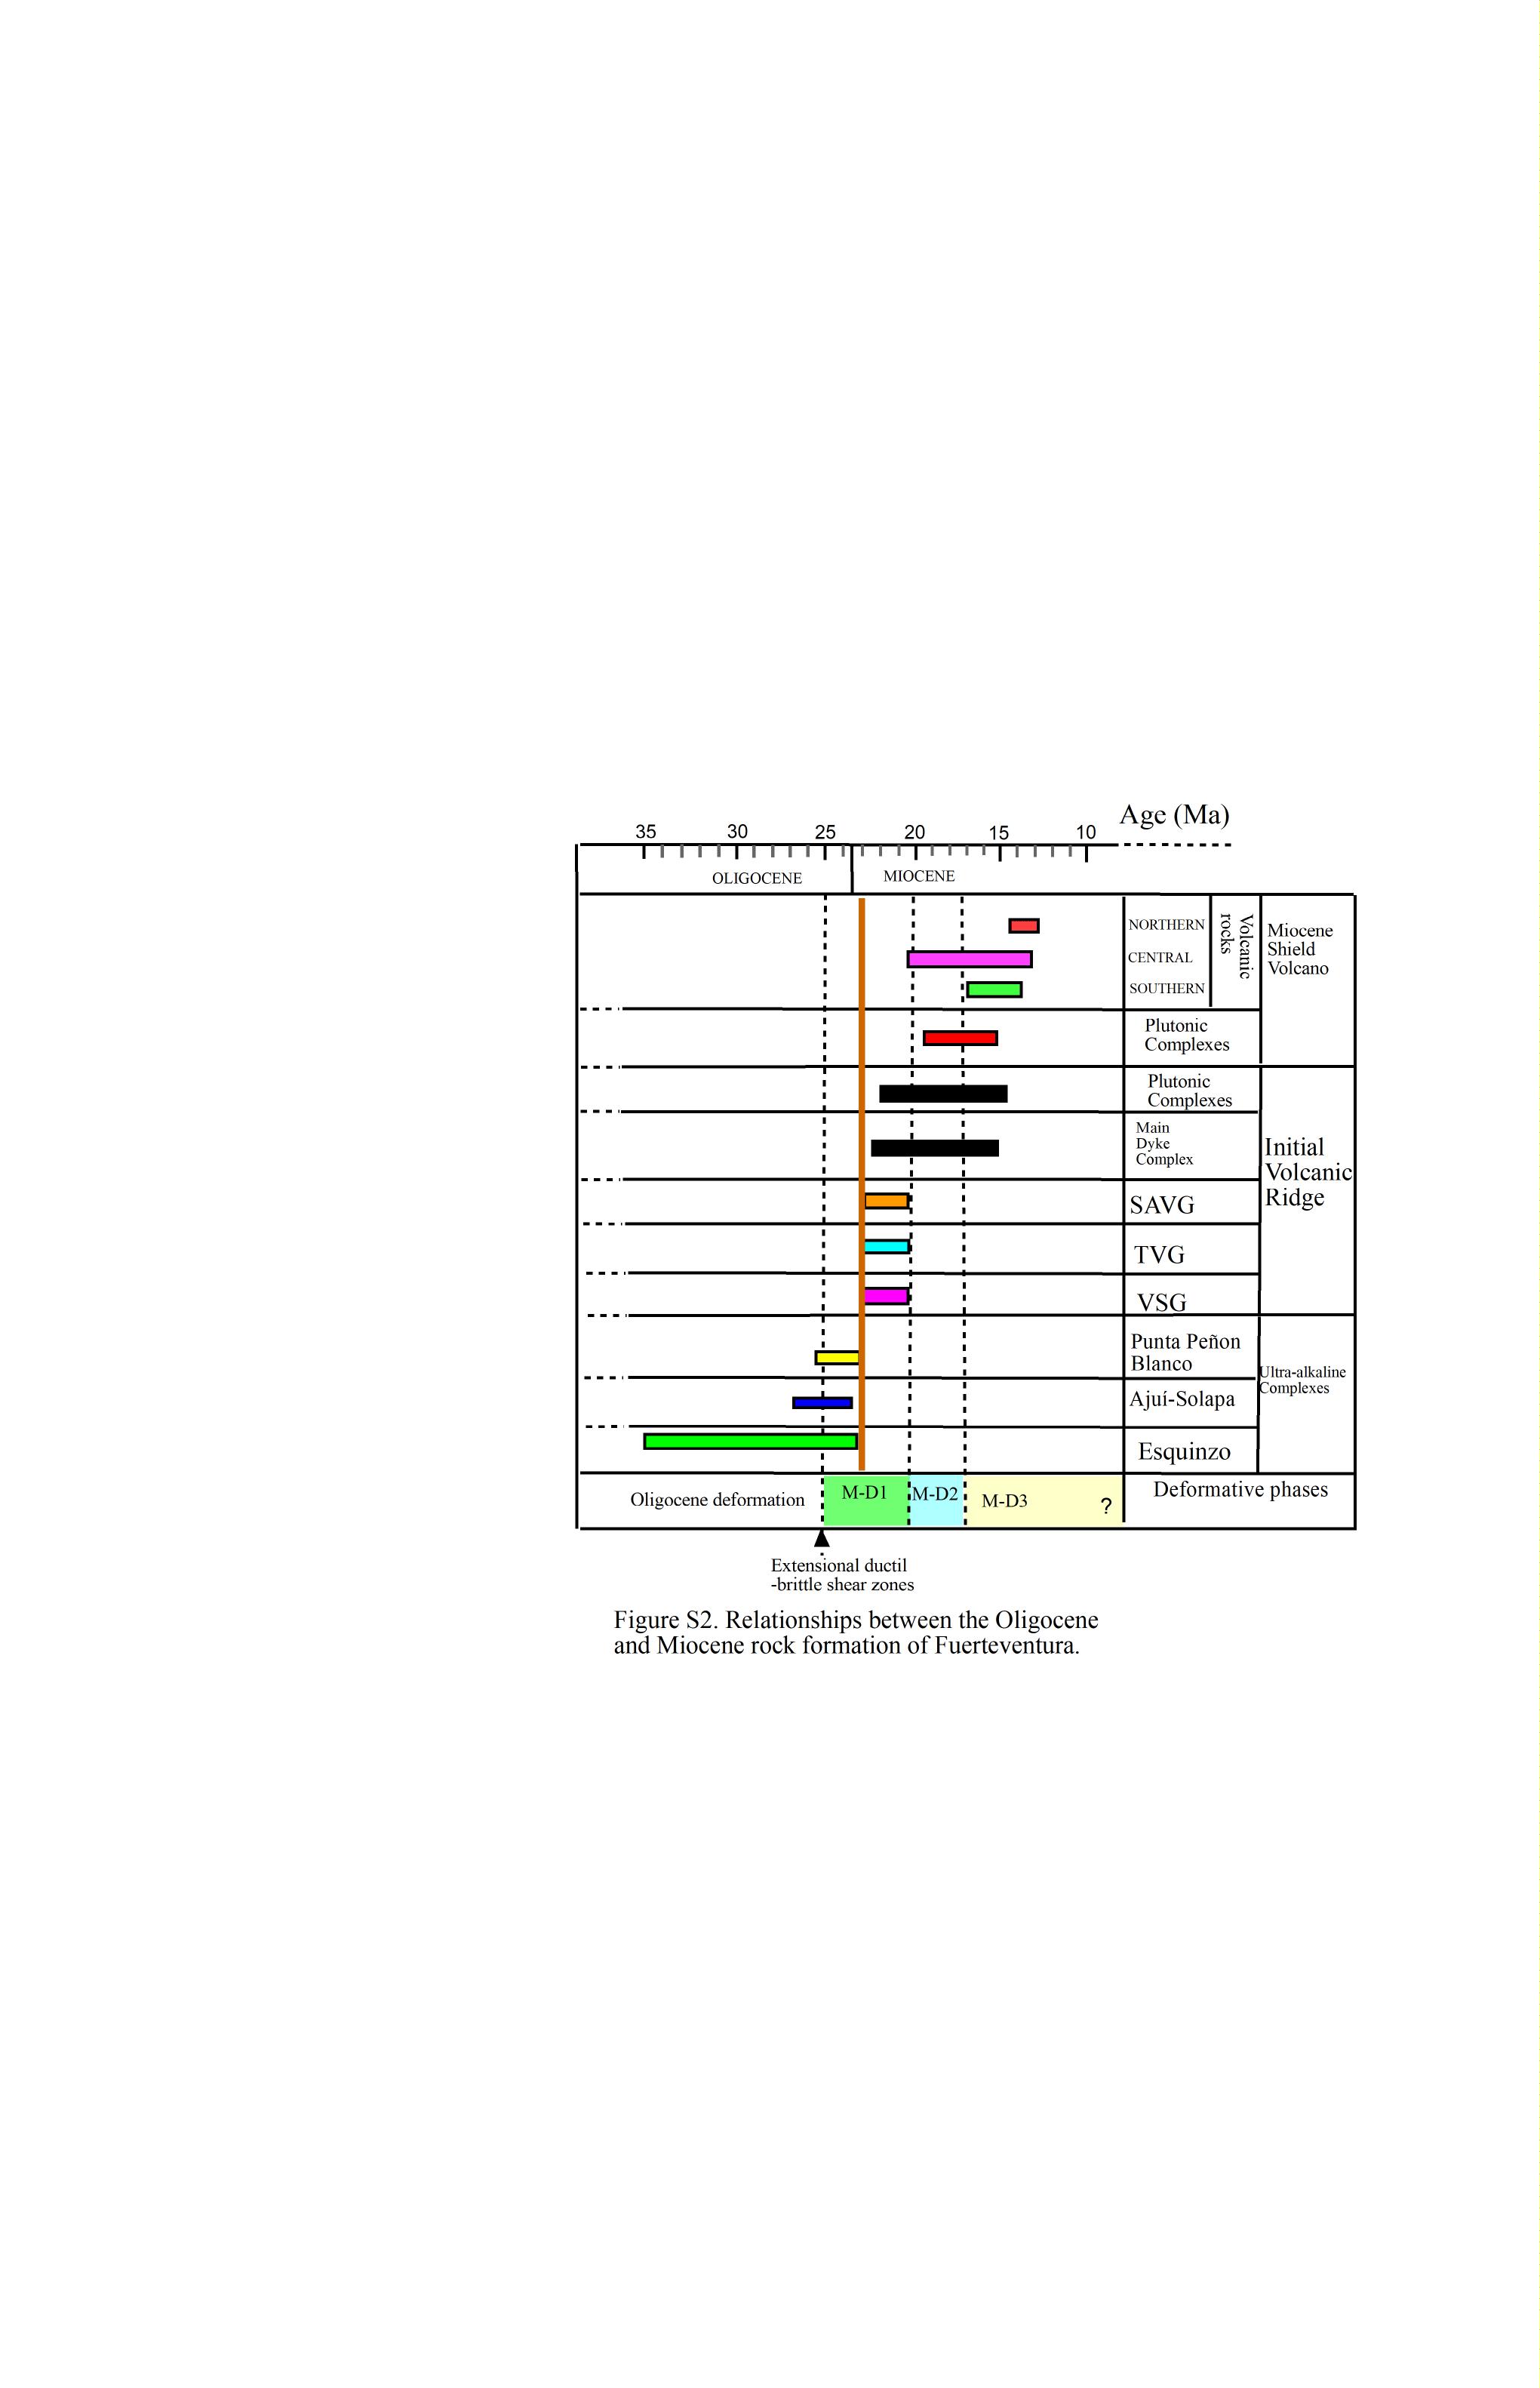

Supplement: s1 [file s1 › Figure S2.jpg]

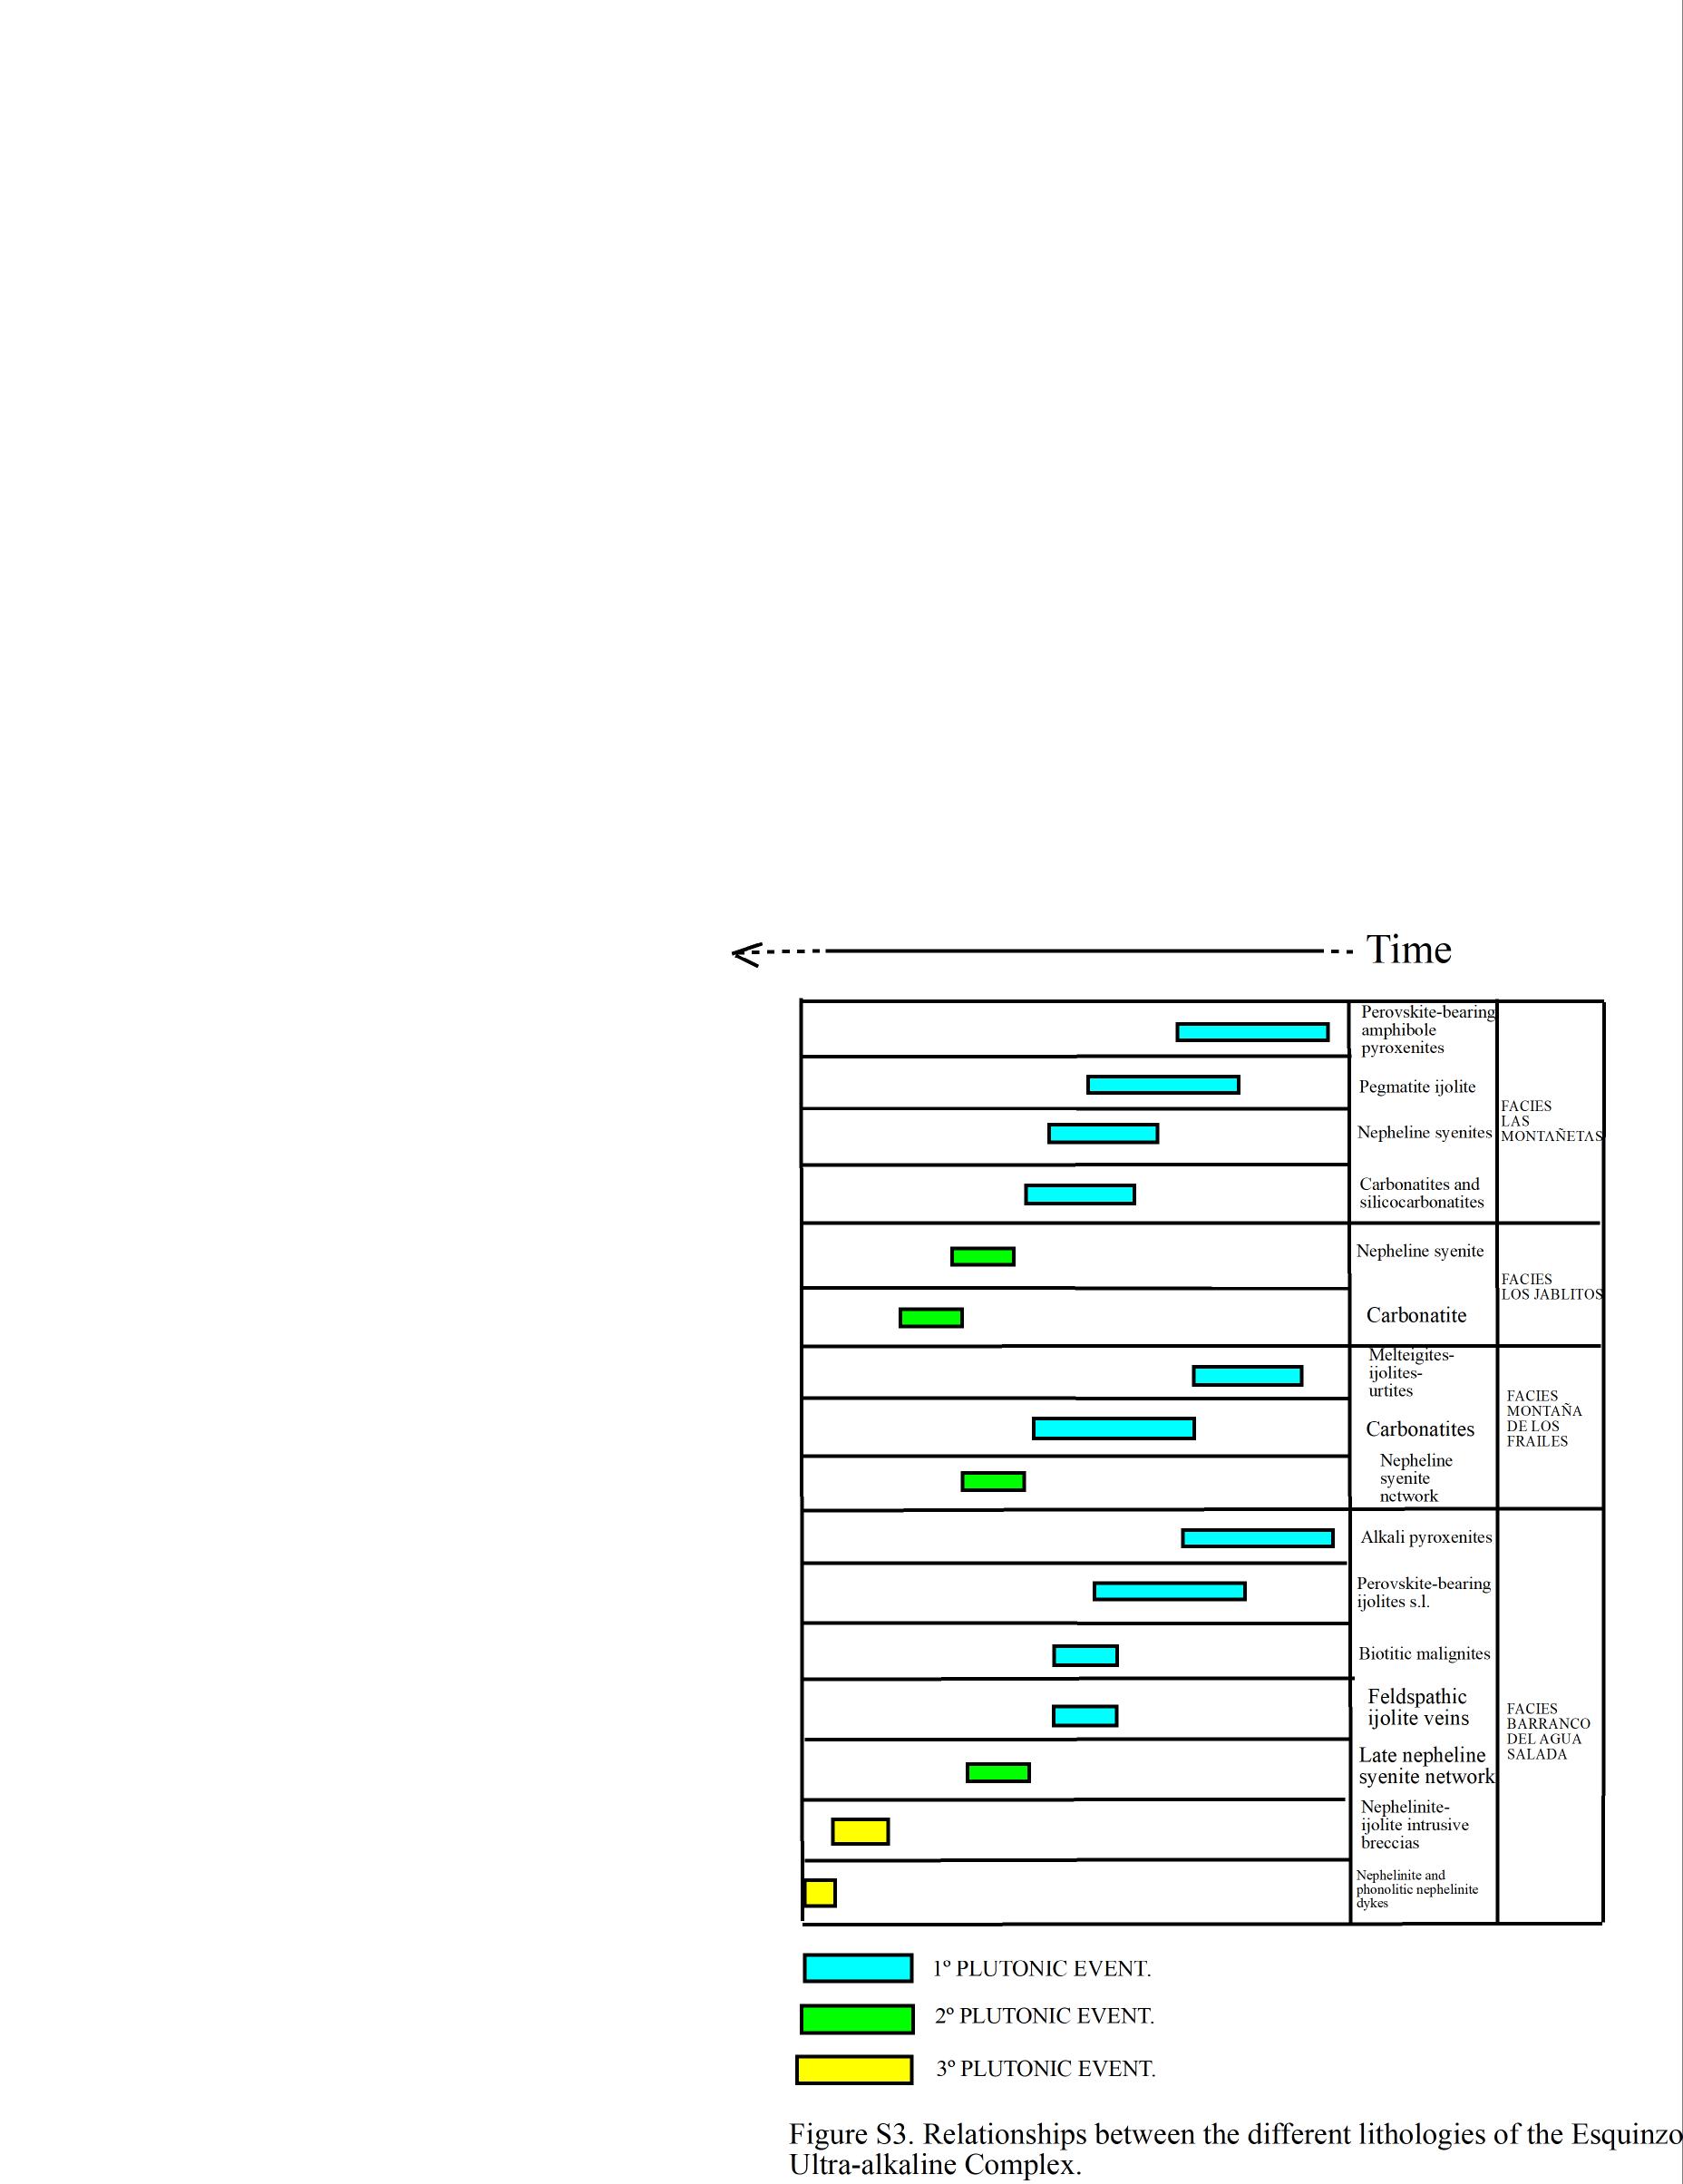

Supplement: s1 [file s1 › Figure S3.jpg]

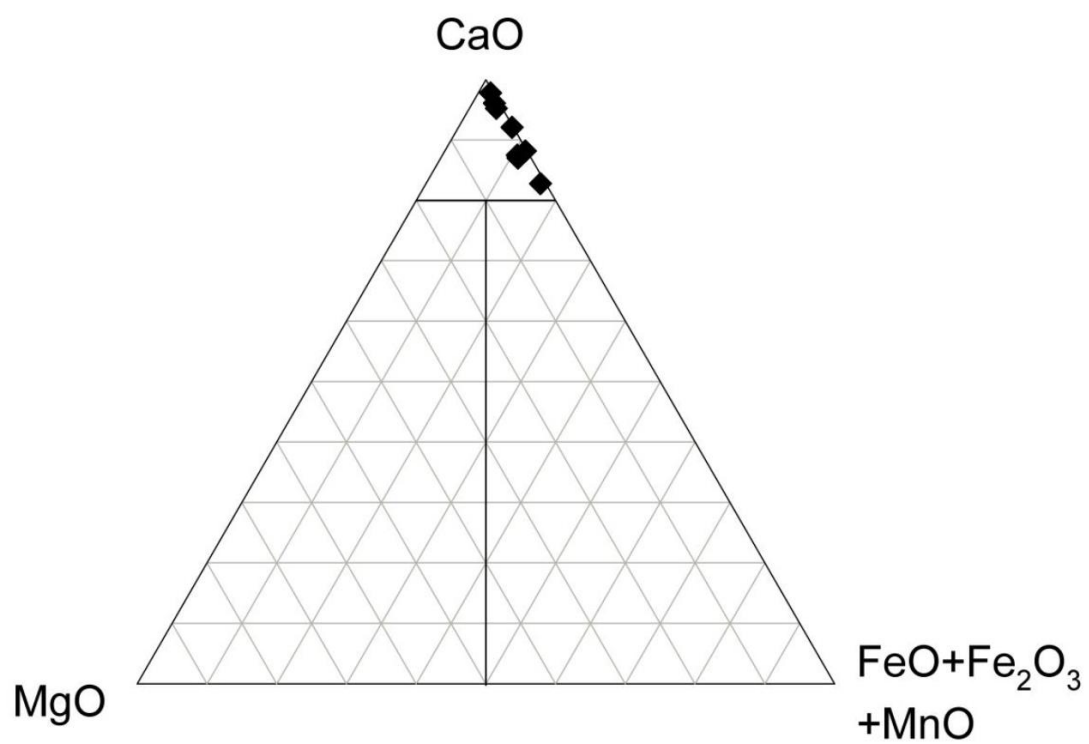

Figure S13. Projection of Esquinzo carbonatite composition in the CaO-MgO-FeO diagram from [83].

Supplement: s1 [file s1 › Figure S13.pdf]

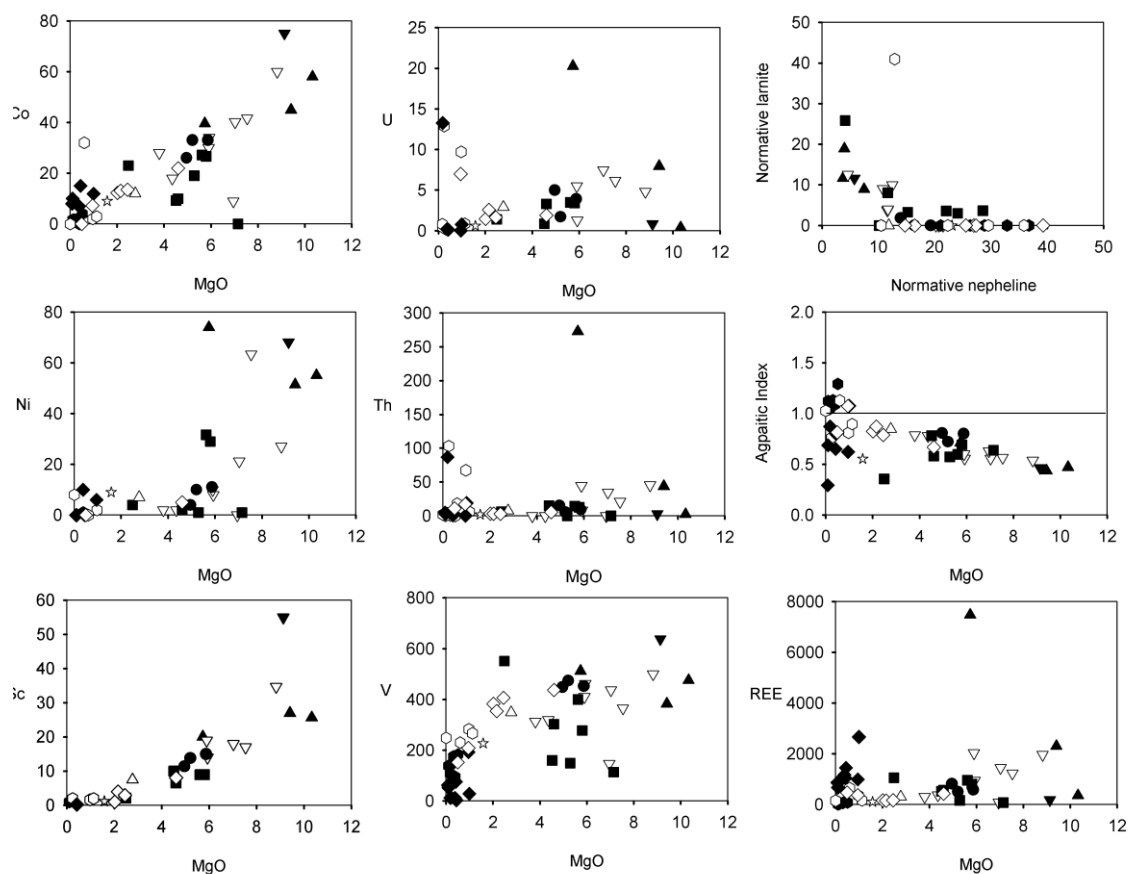

Supplement: s1 [file s1 › Figure S14b.pdf]
